# Supplementary material
Source: bioRxiv or medRxiv preprint supplement (https://www.biorxiv.org/highwire/filestream/21650/field_highwire_adjunct_files/0/044990-1.pdf)
Supplement: Supplementary file [file 044990-1.pdf]

# A hugin-PC

1.

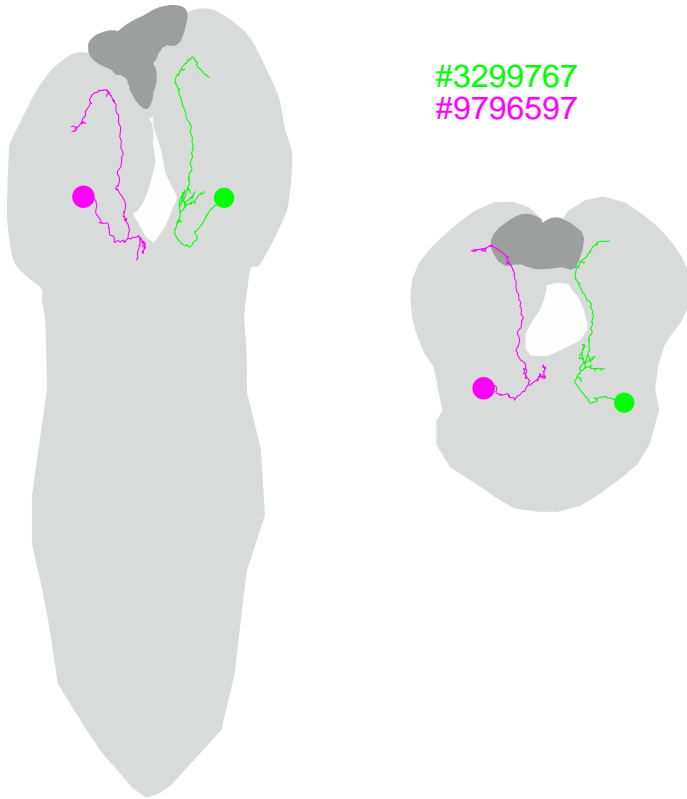

|                   | synapses to |   | synapses from |   |
|-------------------|-------------|---|---------------|---|
| hugin-PC right 1  | 8           | 0 | 4             | 0 |
| hugin-PC right 2  | 0           | 0 | 0             | 0 |
| hugin-PC right 3  | 2           | 0 | 5             | 0 |
| hugin-PC right 4  | 1           | 0 | 1             | 0 |
| hugin-PC left 1   | 0           | 3 | 0             | 4 |
| hugin-PC left 2   | 0           | 0 | 0             | 0 |
| hugin-PC left 3   | 0           | 2 | 0             | 4 |
| hugin-PC left 4   | 0           | 2 | 0             | 3 |
| hugin-RG right 1  | 0           | 0 | 0             | 0 |
| hugin-RG right 2  | 0           | 0 | 0             | 0 |
| hugin-RG left 1   | 0           | 0 | 0             | 0 |
| hugin-RG left 2   | 0           | 0 | 0             | 0 |
| hugin-VNC right 1 | 0           | 1 | 0             | 0 |
| hugin-VNC right 2 | 0           | 0 | 0             | 0 |
| hugin-VNC left 1  | 0           | 0 | 0             | 0 |
| hugin-VNC left 2  | 0           | 0 | 0             | 0 |
| hugin-PH right 1  | 0           | 0 | 0             | 0 |
| hugin-PH right 2  | 0           | 0 | 0             | 0 |
| hugin-PH left 1   | 0           | 0 | 0             | 0 |
| hugin-PH left 2   | 0           | 0 | 0             | 0 |

2.

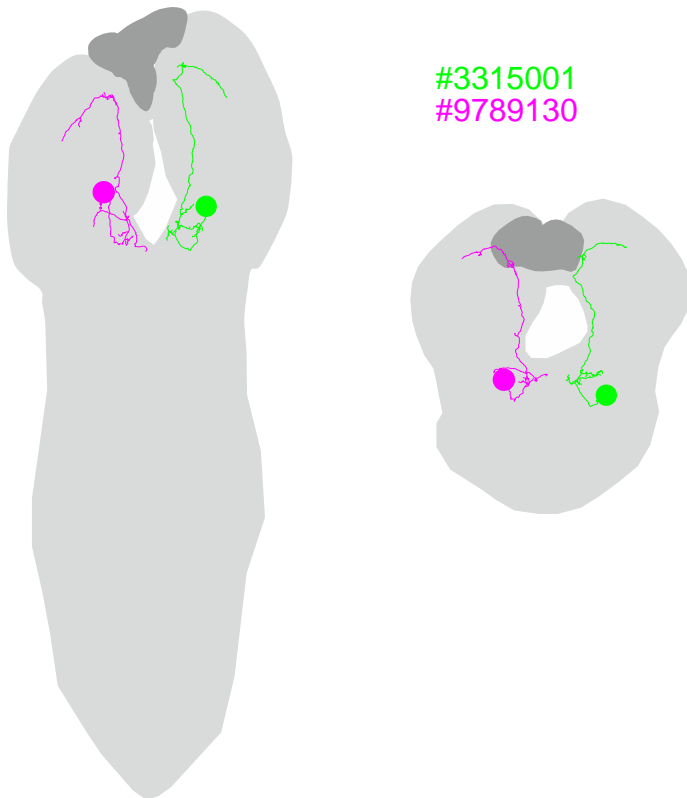

|                   | synapses to |   | synapses from |   |
|-------------------|-------------|---|---------------|---|
| hugin-PC right 1  | 0           | 0 | 0             | 0 |
| hugin-PC right 2  | 4           | 0 | 8             | 0 |
| hugin-PC right 3  | 0           | 0 | 1             | 0 |
| hugin-PC right 4  | 3           | 0 | 5             | 0 |
| hugin-PC left 1   | 0           | 0 | 0             | 0 |
| hugin-PC left 2   | 0           | 4 | 0             | 3 |
| hugin-PC left 3   | 0           | 5 | 0             | 3 |
| hugin-PC left 4   | 0           | 5 | 0             | 7 |
| hugin-RG right 1  | 0           | 0 | 0             | 0 |
| hugin-RG right 2  | 0           | 0 | 0             | 0 |
| hugin-RG left 1   | 0           | 0 | 0             | 0 |
| hugin-RG left 2   | 0           | 1 | 0             | 0 |
| hugin-VNC right 1 | 0           | 0 | 0             | 0 |
| hugin-VNC right 2 | 0           | 2 | 0             | 0 |
| hugin-VNC left 1  | 0           | 0 | 0             | 0 |
| hugin-VNC left 2  | 0           | 0 | 0             | 0 |
| hugin-PH right 1  | 0           | 0 | 0             | 0 |
| hugin-PH right 2  | 0           | 0 | 0             | 0 |
| hugin-PH left 1   | 0           | 0 | 0             | 0 |
| hugin-PH left 2   | 0           | 0 | 0             | 0 |

3.

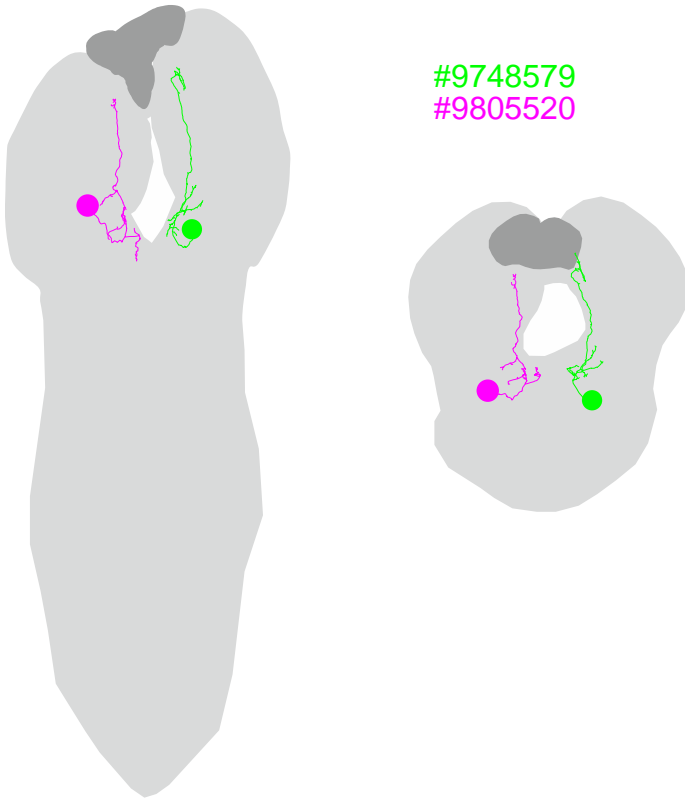

#9748579  
#9805520

synapses to

synapses from

|                   |   |   |   |   |
|-------------------|---|---|---|---|
| hugin-PC right 1  | 3 | 0 | 0 | 0 |
| hugin-PC right 2  | 5 | 0 | 2 | 0 |
| hugin-PC right 3  | 0 | 0 | 0 | 0 |
| hugin-PC right 4  | 2 | 0 | 2 | 0 |
| hugin-PC left 1   | 0 | 3 | 0 | 5 |
| hugin-PC left 2   | 0 | 4 | 0 | 2 |
| hugin-PC left 3   | 0 | 0 | 0 | 0 |
| hugin-PC left 4   | 0 | 1 | 0 | 1 |
| hugin-RG right 1  | 0 | 0 | 0 | 0 |
| hugin-RG right 2  | 0 | 0 | 0 | 0 |
| hugin-RG left 1   | 0 | 0 | 0 | 0 |
| hugin-RG left 2   | 0 | 0 | 0 | 0 |
| hugin-VNC right 1 | 0 | 0 | 0 | 0 |
| hugin-VNC right 2 | 0 | 0 | 0 | 0 |
| hugin-VNC left 1  | 0 | 0 | 0 | 0 |
| hugin-VNC left 2  | 0 | 0 | 0 | 0 |
| hugin-PH right 1  | 0 | 0 | 0 | 0 |
| hugin-PH right 2  | 0 | 0 | 0 | 0 |
| hugin-PH left 1   | 0 | 0 | 0 | 0 |
| hugin-PH left 2   | 0 | 0 | 0 | 0 |

4.

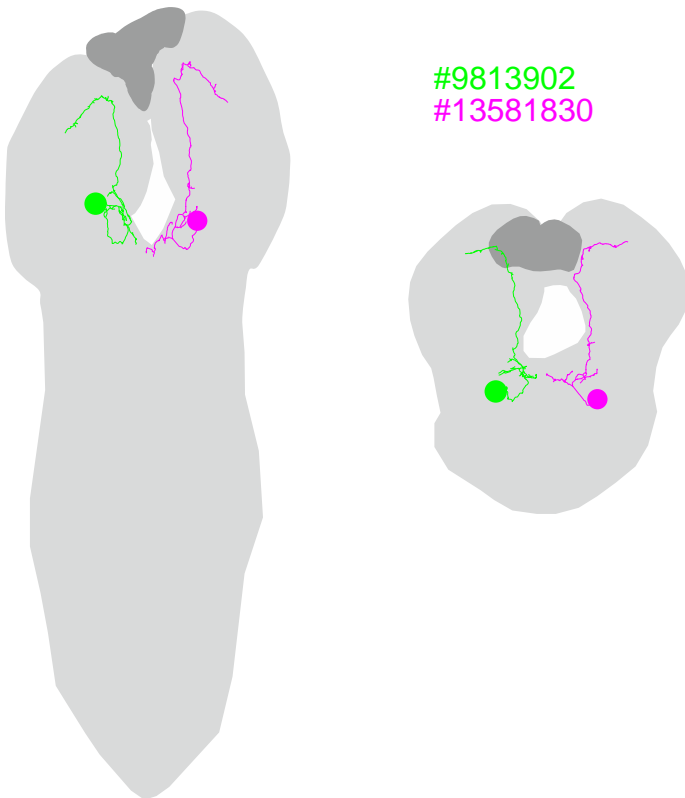

#9813902  
#13581830

synapses to

synapses from

|                   |   |   |   |   |
|-------------------|---|---|---|---|
| hugin-PC right 1  | 0 | 5 | 0 | 3 |
| hugin-PC right 2  | 0 | 3 | 0 | 1 |
| hugin-PC right 3  | 0 | 2 | 0 | 2 |
| hugin-PC right 4  | 0 | 0 | 0 | 0 |
| hugin-PC left 1   | 7 | 0 | 5 | 0 |
| hugin-PC left 2   | 3 | 0 | 2 | 0 |
| hugin-PC left 3   | 1 | 0 | 1 | 0 |
| hugin-PC left 4   | 0 | 0 | 0 | 0 |
| hugin-RG right 1  | 0 | 0 | 0 | 0 |
| hugin-RG right 2  | 0 | 0 | 0 | 0 |
| hugin-RG left 1   | 0 | 0 | 0 | 0 |
| hugin-RG left 2   | 1 | 0 | 0 | 0 |
| hugin-VNC right 1 | 0 | 0 | 0 | 0 |
| hugin-VNC right 2 | 0 | 0 | 0 | 0 |
| hugin-VNC left 1  | 0 | 0 | 0 | 0 |
| hugin-VNC left 2  | 0 | 0 | 0 | 0 |
| hugin-PH right 1  | 0 | 0 | 0 | 0 |
| hugin-PH right 2  | 0 | 0 | 0 | 0 |
| hugin-PH left 1   | 0 | 0 | 0 | 0 |
| hugin-PH left 2   | 0 | 0 | 0 | 0 |

## B hugin-VNC

1.

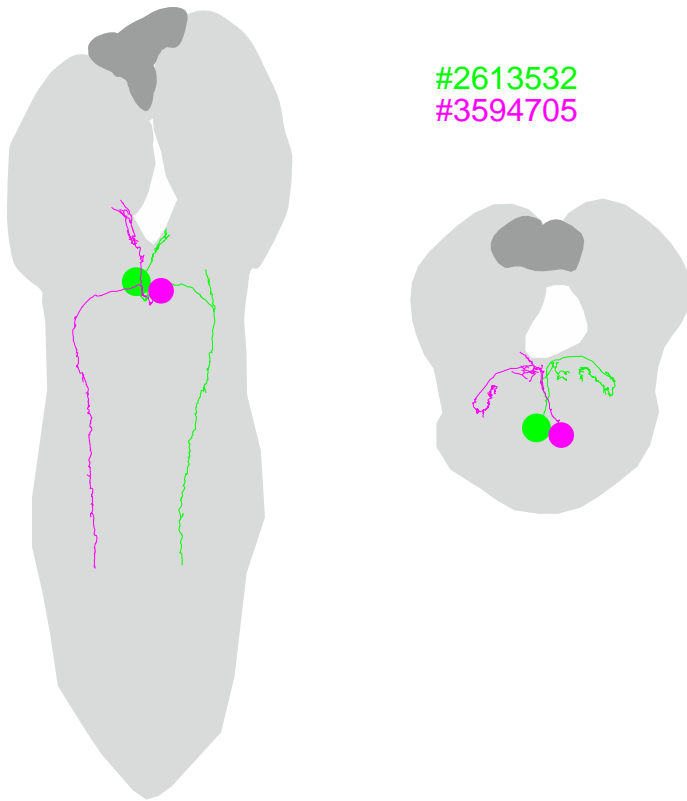

#2613532  
#3594705

|                   | synapses to |   | synapses from |   |
|-------------------|-------------|---|---------------|---|
| hugin-PC right 1  | 0           | 0 | 0             | 0 |
| hugin-PC right 2  | 0           | 0 | 0             | 0 |
| hugin-PC right 3  | 0           | 0 | 0             | 0 |
| hugin-PC right 4  | 0           | 0 | 0             | 0 |
| hugin-PC left 1   | 0           | 0 | 0             | 2 |
| hugin-PC left 2   | 0           | 0 | 0             | 0 |
| hugin-PC left 3   | 0           | 0 | 0             | 0 |
| hugin-PC left 4   | 0           | 0 | 0             | 0 |
| hugin-RG right 1  | 0           | 0 | 0             | 0 |
| hugin-RG right 2  | 0           | 0 | 0             | 0 |
| hugin-RG left 1   | 0           | 0 | 0             | 0 |
| hugin-RG left 2   | 0           | 0 | 0             | 0 |
| hugin-VNC right 1 | 0           | 2 | 0             | 5 |
| hugin-VNC right 2 | 0           | 0 | 0             | 0 |
| hugin-VNC left 1  | 7           | 0 | 6             | 0 |
| hugin-VNC left 2  | 0           | 0 | 0             | 0 |
| hugin-PH right 1  | 0           | 0 | 0             | 0 |
| hugin-PH right 2  | 0           | 0 | 0             | 0 |
| hugin-PH left 1   | 0           | 0 | 0             | 0 |
| hugin-PH left 2   | 0           | 0 | 0             | 0 |

2.

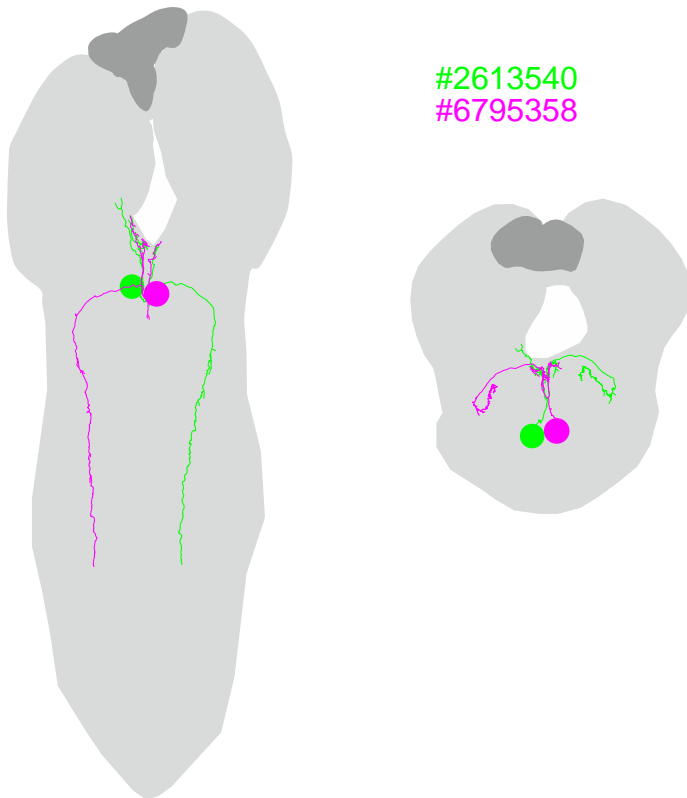

#2613540  
#6795358

|                   | synapses to |   | synapses from |   |
|-------------------|-------------|---|---------------|---|
| hugin-PC right 1  | 0           | 0 | 0             | 0 |
| hugin-PC right 2  | 0           | 0 | 0             | 0 |
| hugin-PC right 3  | 0           | 0 | 0             | 0 |
| hugin-PC right 4  | 0           | 0 | 0             | 0 |
| hugin-PC left 1   | 0           | 0 | 0             | 0 |
| hugin-PC left 2   | 0           | 0 | 0             | 1 |
| hugin-PC left 3   | 0           | 0 | 0             | 0 |
| hugin-PC left 4   | 0           | 0 | 0             | 0 |
| hugin-RG right 1  | 0           | 0 | 0             | 0 |
| hugin-RG right 2  | 0           | 0 | 0             | 0 |
| hugin-RG left 1   | 0           | 0 | 0             | 0 |
| hugin-RG left 2   | 0           | 0 | 0             | 0 |
| hugin-VNC right 1 | 0           | 0 | 0             | 0 |
| hugin-VNC right 2 | 0           | 5 | 0             | 2 |
| hugin-VNC left 1  | 0           | 0 | 0             | 0 |
| hugin-VNC left 2  | 6           | 0 | 7             | 0 |
| hugin-PH right 1  | 0           | 0 | 0             | 0 |
| hugin-PH right 2  | 0           | 0 | 0             | 0 |
| hugin-PH left 1   | 0           | 0 | 0             | 0 |
| hugin-PH left 2   | 0           | 0 | 0             | 0 |

## C hugin-RG

1.

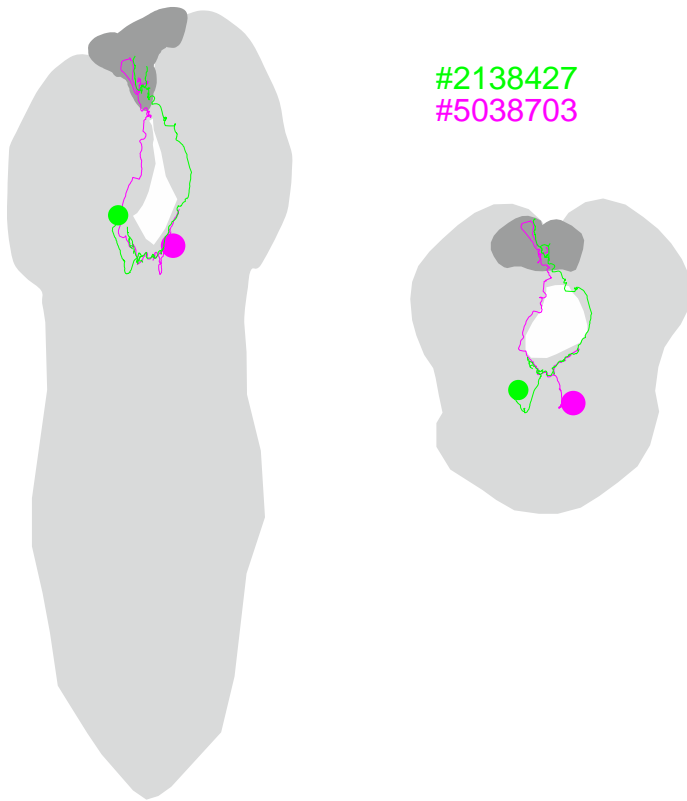

#2138427  
#5038703

|                   | synapses to |   | synapses from |   |
|-------------------|-------------|---|---------------|---|
| hugin-PC right 1  | 0           | 0 | 0             | 0 |
| hugin-PC right 2  | 0           | 0 | 0             | 0 |
| hugin-PC right 3  | 0           | 0 | 0             | 0 |
| hugin-PC right 4  | 0           | 0 | 0             | 0 |
| hugin-PC left 1   | 0           | 0 | 0             | 0 |
| hugin-PC left 2   | 0           | 0 | 0             | 0 |
| hugin-PC left 3   | 0           | 0 | 0             | 0 |
| hugin-PC left 4   | 0           | 0 | 0             | 0 |
| hugin-RG right 1  | 0           | 0 | 0             | 0 |
| hugin-RG right 2  | 0           | 0 | 0             | 0 |
| hugin-RG left 1   | 0           | 0 | 0             | 0 |
| hugin-RG left 2   | 0           | 0 | 0             | 0 |
| hugin-VNC right 1 | 0           | 0 | 0             | 0 |
| hugin-VNC right 2 | 0           | 0 | 0             | 0 |
| hugin-VNC left 1  | 0           | 0 | 0             | 0 |
| hugin-VNC left 2  | 0           | 0 | 0             | 0 |
| hugin-PH right 1  | 0           | 0 | 0             | 0 |
| hugin-PH right 2  | 0           | 0 | 0             | 0 |
| hugin-PH left 1   | 0           | 0 | 0             | 0 |
| hugin-PH left 2   | 0           | 0 | 0             | 0 |

2.

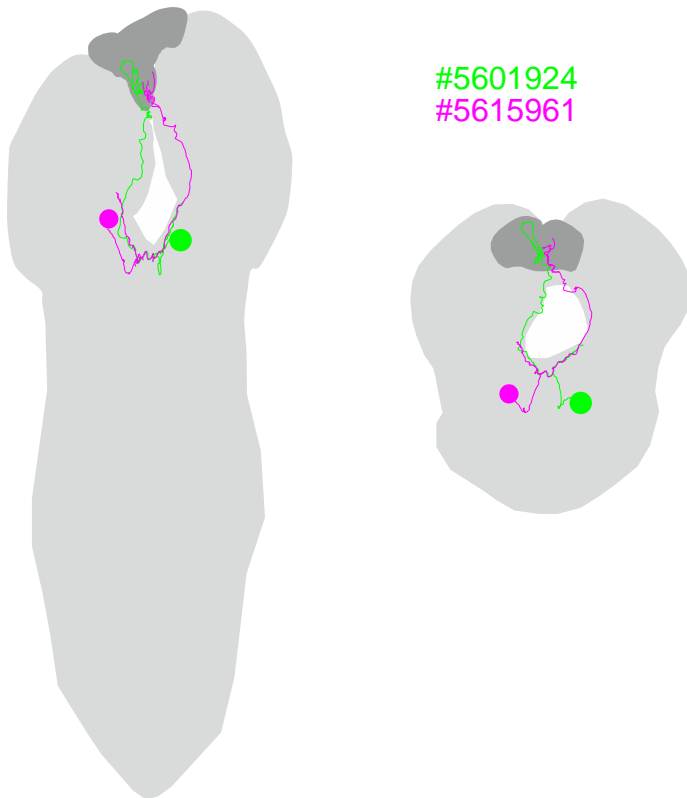

#5601924  
#5615961

|                   | synapses to |   | synapses from |   |
|-------------------|-------------|---|---------------|---|
| hugin-PC right 1  | 0           | 0 | 0             | 0 |
| hugin-PC right 2  | 0           | 0 | 0             | 0 |
| hugin-PC right 3  | 0           | 0 | 0             | 0 |
| hugin-PC right 4  | 0           | 0 | 0             | 0 |
| hugin-PC left 1   | 0           | 0 | 0             | 1 |
| hugin-PC left 2   | 0           | 0 | 0             | 0 |
| hugin-PC left 3   | 0           | 0 | 0             | 0 |
| hugin-PC left 4   | 0           | 0 | 0             | 1 |
| hugin-RG right 1  | 0           | 0 | 0             | 0 |
| hugin-RG right 2  | 0           | 0 | 0             | 0 |
| hugin-RG left 1   | 0           | 0 | 0             | 0 |
| hugin-RG left 2   | 0           | 0 | 0             | 0 |
| hugin-VNC right 1 | 0           | 0 | 0             | 0 |
| hugin-VNC right 2 | 0           | 0 | 0             | 0 |
| hugin-VNC left 1  | 0           | 0 | 0             | 0 |
| hugin-VNC left 2  | 0           | 0 | 0             | 0 |
| hugin-PH right 1  | 0           | 0 | 0             | 0 |
| hugin-PH right 2  | 0           | 0 | 0             | 0 |
| hugin-PH left 1   | 0           | 0 | 0             | 0 |
| hugin-PH left 2   | 0           | 0 | 0             | 0 |

## D hugin-PH

1.

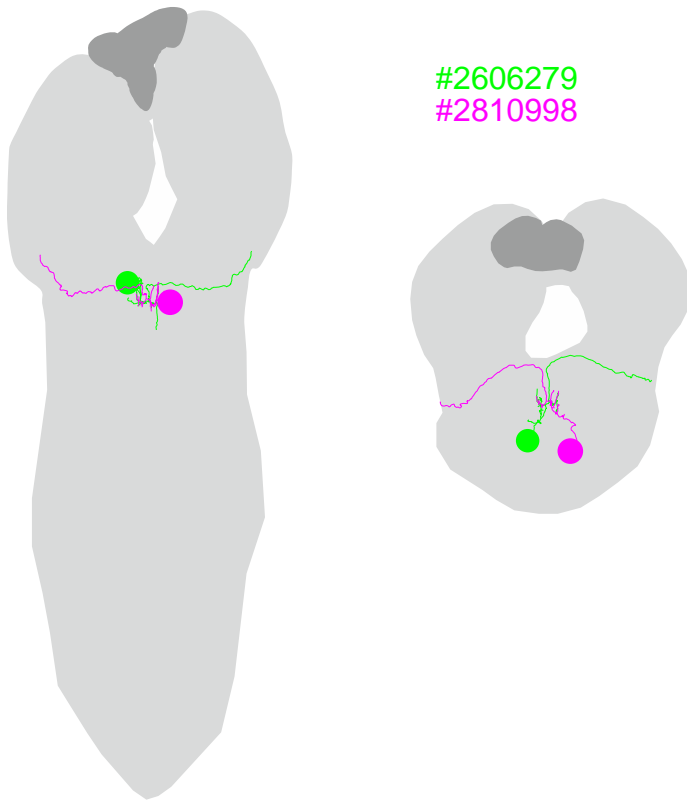

#2606279  
#2810998

|                   | synapses to |   | synapses from |   |
|-------------------|-------------|---|---------------|---|
| hugin-PC right 1  | 0           | 0 | 0             | 0 |
| hugin-PC right 2  | 0           | 0 | 0             | 0 |
| hugin-PC right 3  | 0           | 0 | 0             | 0 |
| hugin-PC right 4  | 0           | 0 | 0             | 0 |
| hugin-PC left 1   | 0           | 0 | 0             | 0 |
| hugin-PC left 2   | 0           | 0 | 0             | 0 |
| hugin-PC left 3   | 0           | 0 | 0             | 0 |
| hugin-PC left 4   | 0           | 0 | 0             | 0 |
| hugin-RG right 1  | 0           | 0 | 0             | 0 |
| hugin-RG right 2  | 0           | 0 | 0             | 0 |
| hugin-RG left 1   | 0           | 0 | 0             | 0 |
| hugin-RG left 2   | 0           | 0 | 0             | 0 |
| hugin-VNC right 1 | 0           | 0 | 0             | 0 |
| hugin-VNC right 2 | 0           | 0 | 0             | 0 |
| hugin-VNC left 1  | 0           | 0 | 0             | 0 |
| hugin-VNC left 2  | 0           | 0 | 0             | 0 |
| hugin-PH right 1  | 0           | 0 | 0             | 0 |
| hugin-PH right 2  | 0           | 0 | 0             | 0 |
| hugin-PH left 1   | 0           | 0 | 0             | 1 |
| hugin-PH left 2   | 0           | 0 | 0             | 0 |

2.

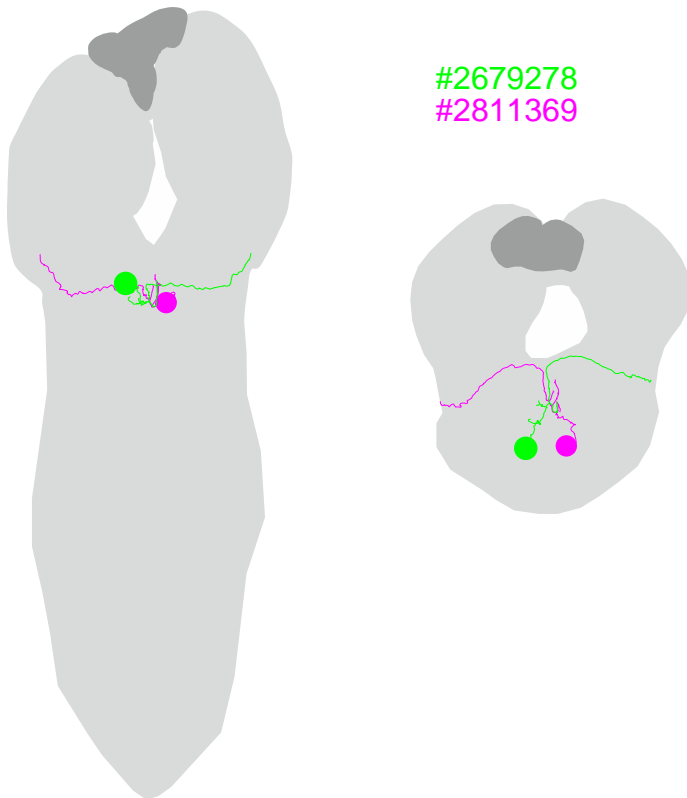

#2679278  
#2811369

|                   | synapses to |   | synapses from |   |
|-------------------|-------------|---|---------------|---|
| hugin-PC right 1  | 0           | 0 | 0             | 0 |
| hugin-PC right 2  | 0           | 0 | 0             | 0 |
| hugin-PC right 3  | 0           | 0 | 0             | 0 |
| hugin-PC right 4  | 0           | 0 | 0             | 0 |
| hugin-PC left 1   | 0           | 0 | 0             | 0 |
| hugin-PC left 2   | 0           | 0 | 0             | 0 |
| hugin-PC left 3   | 0           | 0 | 0             | 0 |
| hugin-PC left 4   | 0           | 0 | 0             | 0 |
| hugin-RG right 1  | 0           | 0 | 0             | 0 |
| hugin-RG right 2  | 0           | 0 | 0             | 0 |
| hugin-RG left 1   | 0           | 0 | 0             | 0 |
| hugin-RG left 2   | 0           | 0 | 0             | 0 |
| hugin-VNC right 1 | 0           | 0 | 0             | 0 |
| hugin-VNC right 2 | 0           | 0 | 0             | 0 |
| hugin-VNC left 1  | 0           | 0 | 0             | 0 |
| hugin-VNC left 2  | 0           | 0 | 0             | 0 |
| hugin-PH right 1  | 0           | 0 | 0             | 0 |
| hugin-PH right 2  | 1           | 0 | 0             | 0 |
| hugin-PH left 1   | 0           | 0 | 0             | 0 |
| hugin-PH left 2   | 0           | 0 | 0             | 0 |

# E Insulin-producing cells (IPCs)

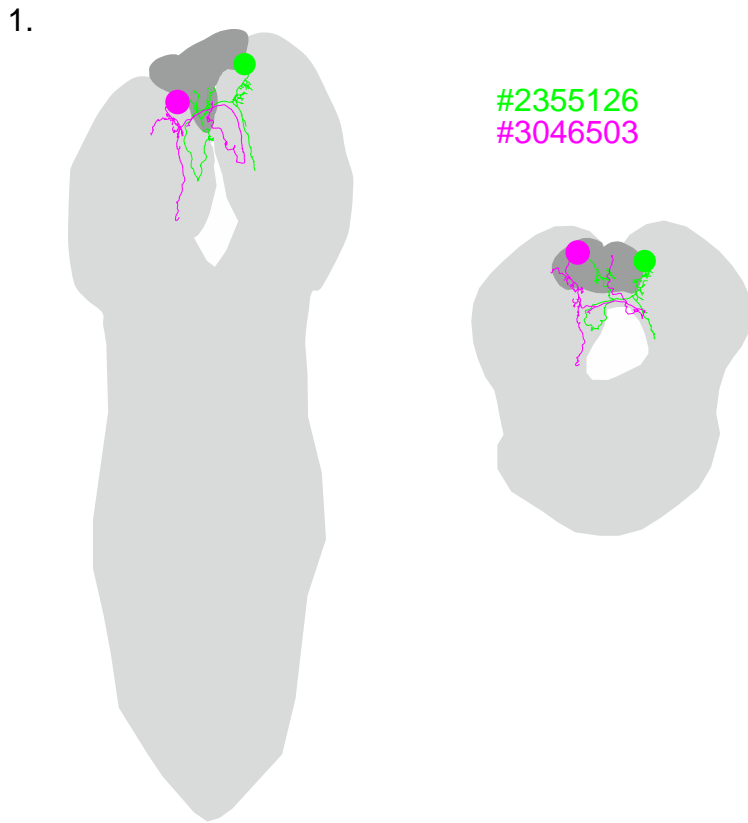

|                   | synapses to |   | synapses from |   |
|-------------------|-------------|---|---------------|---|
| hugin-PC right 1  | 0           | 0 | 2             | 0 |
| hugin-PC right 2  | 0           | 0 | 6             | 0 |
| hugin-PC right 3  | 0           | 0 | 2             | 0 |
| hugin-PC right 4  | 0           | 0 | 0             | 0 |
| hugin-PC left 1   | 0           | 0 | 0             | 2 |
| hugin-PC left 2   | 0           | 0 | 0             | 0 |
| hugin-PC left 3   | 0           | 0 | 0             | 2 |
| hugin-PC left 4   | 0           | 0 | 0             | 2 |
| hugin-RG right 1  | 0           | 0 | 0             | 0 |
| hugin-RG right 2  | 0           | 0 | 0             | 0 |
| hugin-RG left 1   | 0           | 0 | 0             | 0 |
| hugin-RG left 2   | 0           | 0 | 0             | 0 |
| hugin-VNC right 1 | 0           | 0 | 0             | 0 |
| hugin-VNC right 2 | 0           | 0 | 0             | 0 |
| hugin-VNC left 1  | 0           | 0 | 0             | 0 |
| hugin-VNC left 2  | 0           | 0 | 0             | 0 |
| hugin-PH right 1  | 0           | 0 | 0             | 0 |
| hugin-PH right 2  | 0           | 0 | 0             | 0 |
| hugin-PH left 1   | 0           | 0 | 0             | 0 |
| hugin-PH left 2   | 0           | 0 | 0             | 0 |

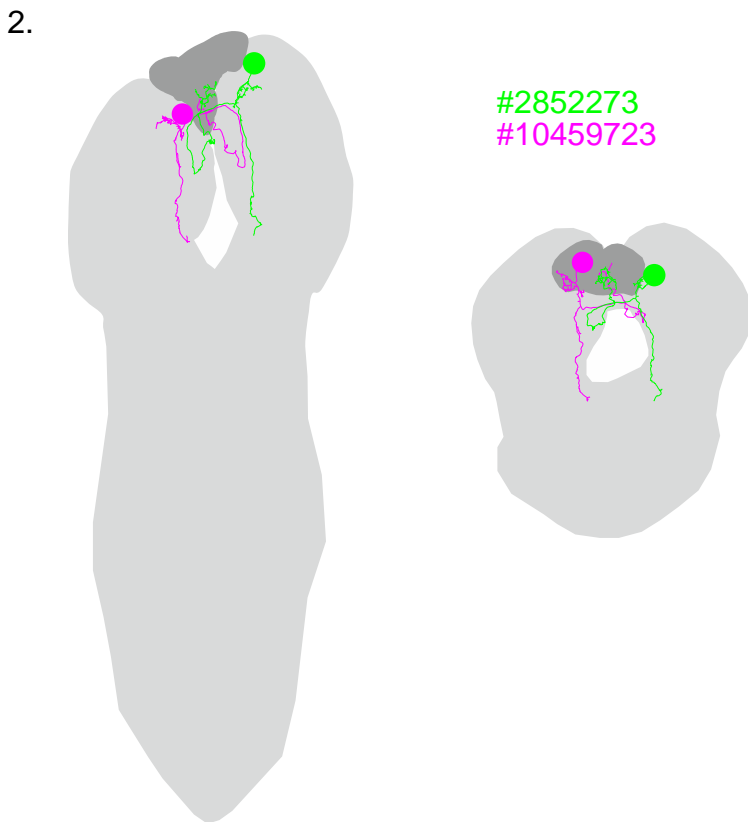

|                   | synapses to |   | synapses from |   |
|-------------------|-------------|---|---------------|---|
| hugin-PC right 1  | 0           | 0 | 1             | 0 |
| hugin-PC right 2  | 0           | 0 | 5             | 0 |
| hugin-PC right 3  | 0           | 0 | 1             | 0 |
| hugin-PC right 4  | 0           | 0 | 1             | 0 |
| hugin-PC left 1   | 0           | 0 | 0             | 2 |
| hugin-PC left 2   | 0           | 0 | 0             | 1 |
| hugin-PC left 3   | 0           | 0 | 0             | 0 |
| hugin-PC left 4   | 0           | 0 | 0             | 3 |
| hugin-RG right 1  | 0           | 0 | 1             | 0 |
| hugin-RG right 2  | 0           | 0 | 0             | 0 |
| hugin-RG left 1   | 0           | 0 | 0             | 0 |
| hugin-RG left 2   | 0           | 0 | 0             | 0 |
| hugin-VNC right 1 | 0           | 0 | 0             | 0 |
| hugin-VNC right 2 | 0           | 0 | 0             | 0 |
| hugin-VNC left 1  | 0           | 0 | 0             | 0 |
| hugin-VNC left 2  | 0           | 0 | 0             | 0 |
| hugin-PH right 1  | 0           | 0 | 0             | 0 |
| hugin-PH right 2  | 0           | 0 | 0             | 0 |
| hugin-PH left 1   | 0           | 0 | 0             | 0 |
| hugin-PH left 2   | 0           | 0 | 0             | 0 |

3.

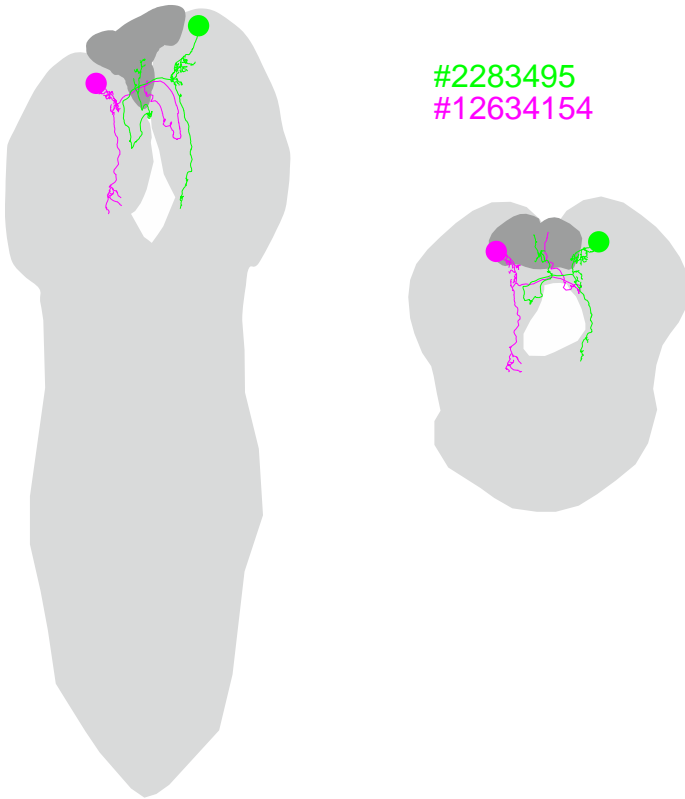

#2283495  
#12634154

synapses to

synapses from

|                   |   |   |   |   |
|-------------------|---|---|---|---|
| hugin-PC right 1  | 0 | 0 | 4 | 0 |
| hugin-PC right 2  | 0 | 0 | 5 | 0 |
| hugin-PC right 3  | 0 | 0 | 3 | 0 |
| hugin-PC right 4  | 0 | 0 | 1 | 0 |
| hugin-PC left 1   | 0 | 0 | 0 | 0 |
| hugin-PC left 2   | 0 | 0 | 0 | 5 |
| hugin-PC left 3   | 0 | 0 | 0 | 3 |
| hugin-PC left 4   | 0 | 0 | 0 | 3 |
| hugin-RG right 1  | 0 | 0 | 0 | 0 |
| hugin-RG right 2  | 0 | 0 | 1 | 0 |
| hugin-RG left 1   | 0 | 0 | 0 | 0 |
| hugin-RG left 2   | 0 | 0 | 0 | 0 |
| hugin-VNC right 1 | 0 | 0 | 0 | 0 |
| hugin-VNC right 2 | 0 | 0 | 0 | 0 |
| hugin-VNC left 1  | 0 | 0 | 0 | 0 |
| hugin-VNC left 2  | 0 | 0 | 0 | 0 |
| hugin-PH right 1  | 0 | 0 | 0 | 0 |
| hugin-PH right 2  | 0 | 0 | 0 | 0 |
| hugin-PH left 1   | 0 | 0 | 0 | 0 |
| hugin-PH left 2   | 0 | 0 | 0 | 0 |

4.

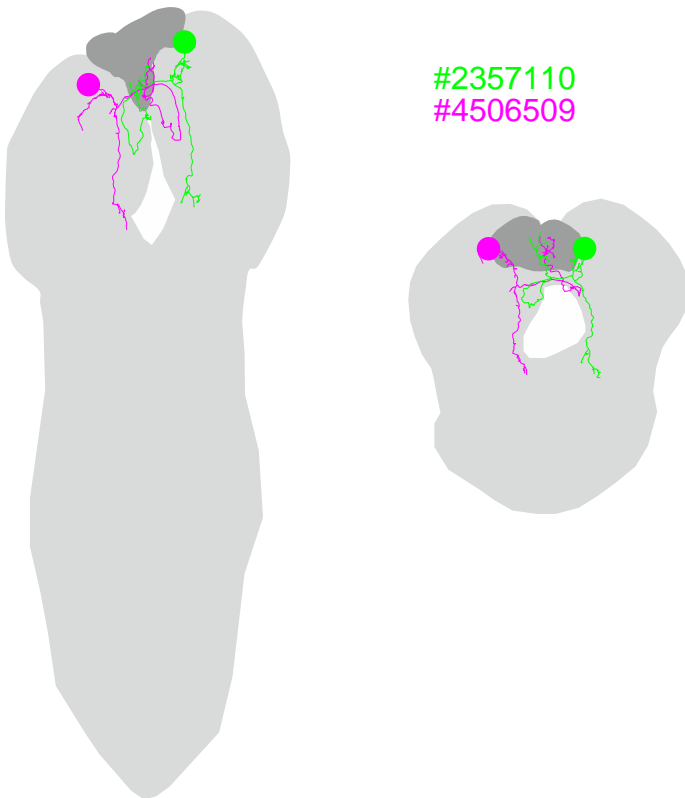

#2357110  
#4506509

synapses to

synapses from

|                   |   |   |   |   |
|-------------------|---|---|---|---|
| hugin-PC right 1  | 0 | 0 | 3 | 0 |
| hugin-PC right 2  | 0 | 0 | 3 | 0 |
| hugin-PC right 3  | 0 | 0 | 0 | 0 |
| hugin-PC right 4  | 0 | 0 | 1 | 0 |
| hugin-PC left 1   | 0 | 0 | 0 | 9 |
| hugin-PC left 2   | 0 | 0 | 0 | 1 |
| hugin-PC left 3   | 0 | 0 | 0 | 1 |
| hugin-PC left 4   | 0 | 0 | 0 | 2 |
| hugin-RG right 1  | 0 | 0 | 0 | 0 |
| hugin-RG right 2  | 0 | 0 | 0 | 0 |
| hugin-RG left 1   | 0 | 0 | 0 | 0 |
| hugin-RG left 2   | 0 | 0 | 0 | 0 |
| hugin-VNC right 1 | 0 | 0 | 0 | 0 |
| hugin-VNC right 2 | 0 | 0 | 0 | 0 |
| hugin-VNC left 1  | 0 | 0 | 0 | 0 |
| hugin-VNC left 2  | 0 | 0 | 0 | 0 |
| hugin-PH right 1  | 0 | 0 | 0 | 0 |
| hugin-PH right 2  | 0 | 0 | 0 | 0 |
| hugin-PH left 1   | 0 | 0 | 0 | 0 |
| hugin-PH left 2   | 0 | 0 | 0 | 0 |

5.

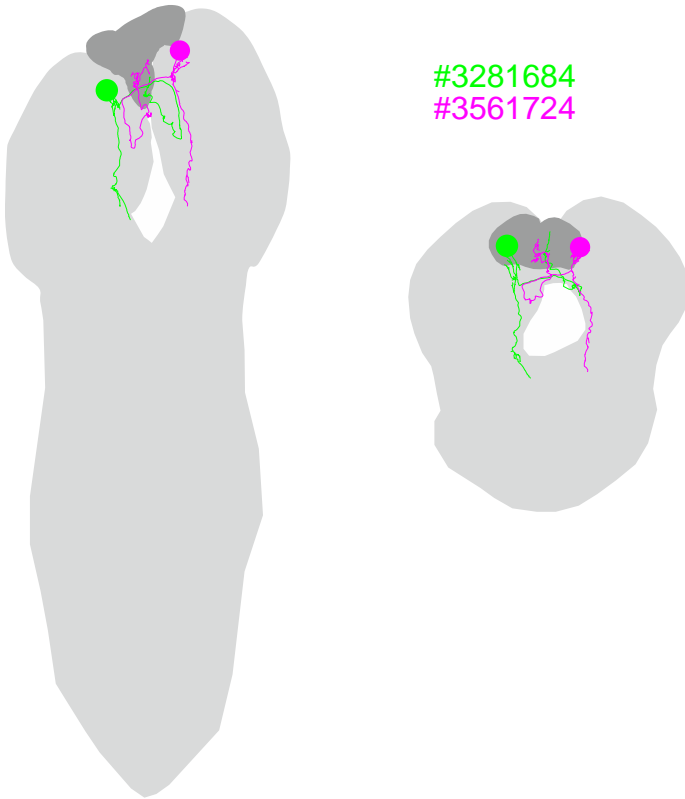

synapses to

synapses from

|                   |   |   |   |   |
|-------------------|---|---|---|---|
| hugin-PC right 1  | 0 | 0 | 0 | 1 |
| hugin-PC right 2  | 0 | 0 | 0 | 4 |
| hugin-PC right 3  | 0 | 0 | 0 | 5 |
| hugin-PC right 4  | 0 | 0 | 0 | 0 |
| hugin-PC left 1   | 0 | 0 | 3 | 0 |
| hugin-PC left 2   | 0 | 0 | 3 | 0 |
| hugin-PC left 3   | 0 | 0 | 3 | 0 |
| hugin-PC left 4   | 0 | 0 | 2 | 0 |
| hugin-RG right 1  | 0 | 0 | 0 | 0 |
| hugin-RG right 2  | 0 | 0 | 0 | 0 |
| hugin-RG left 1   | 0 | 0 | 0 | 0 |
| hugin-RG left 2   | 0 | 0 | 0 | 0 |
| hugin-VNC right 1 | 0 | 0 | 0 | 0 |
| hugin-VNC right 2 | 0 | 0 | 0 | 0 |
| hugin-VNC left 1  | 0 | 0 | 0 | 0 |
| hugin-VNC left 2  | 0 | 0 | 0 | 0 |
| hugin-PH right 1  | 0 | 0 | 0 | 0 |
| hugin-PH right 2  | 0 | 0 | 0 | 0 |
| hugin-PH left 1   | 0 | 0 | 0 | 0 |
| hugin-PH left 2   | 0 | 0 | 0 | 0 |

6.

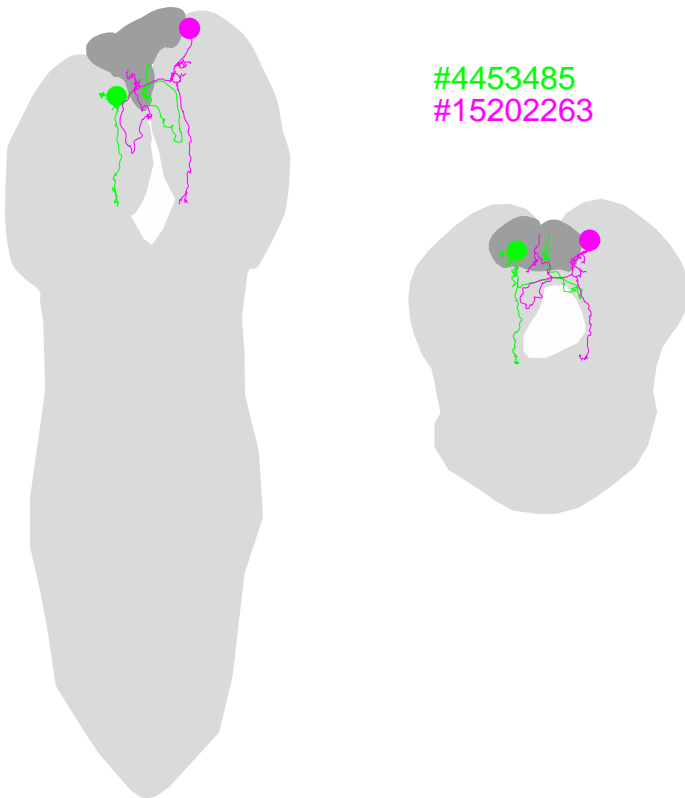

synapses to

synapses from

|                   |   |   |   |   |
|-------------------|---|---|---|---|
| hugin-PC right 1  | 0 | 0 | 0 | 7 |
| hugin-PC right 2  | 0 | 0 | 0 | 1 |
| hugin-PC right 3  | 0 | 0 | 0 | 1 |
| hugin-PC right 4  | 0 | 0 | 0 | 1 |
| hugin-PC left 1   | 0 | 0 | 4 | 0 |
| hugin-PC left 2   | 0 | 0 | 3 | 0 |
| hugin-PC left 3   | 0 | 0 | 3 | 0 |
| hugin-PC left 4   | 0 | 0 | 0 | 0 |
| hugin-RG right 1  | 0 | 0 | 0 | 0 |
| hugin-RG right 2  | 0 | 0 | 0 | 0 |
| hugin-RG left 1   | 0 | 0 | 0 | 0 |
| hugin-RG left 2   | 0 | 0 | 1 | 0 |
| hugin-VNC right 1 | 0 | 0 | 0 | 0 |
| hugin-VNC right 2 | 0 | 0 | 0 | 0 |
| hugin-VNC left 1  | 0 | 0 | 0 | 0 |
| hugin-VNC left 2  | 0 | 0 | 0 | 0 |
| hugin-PH right 1  | 0 | 0 | 0 | 0 |
| hugin-PH right 2  | 0 | 0 | 0 | 0 |
| hugin-PH left 1   | 0 | 0 | 0 | 0 |
| hugin-PH left 2   | 0 | 0 | 0 | 0 |



7.

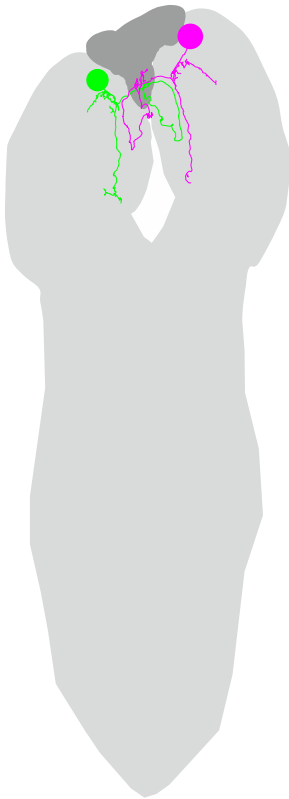

#10329208  
#13535380

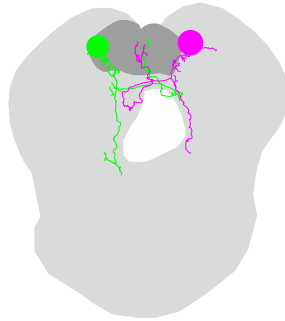

synapses to

synapses from

|                   |   |   |   |   |
|-------------------|---|---|---|---|
| hugin-PC right 1  | 0 | 1 | 0 | 7 |
| hugin-PC right 2  | 0 | 0 | 0 | 3 |
| hugin-PC right 3  | 0 | 0 | 0 | 3 |
| hugin-PC right 4  | 0 | 0 | 0 | 1 |
| hugin-PC left 1   | 0 | 0 | 7 | 0 |
| hugin-PC left 2   | 0 | 0 | 2 | 0 |
| hugin-PC left 3   | 0 | 0 | 4 | 0 |
| hugin-PC left 4   | 0 | 0 | 1 | 0 |
| hugin-RG right 1  | 0 | 0 | 0 | 0 |
| hugin-RG right 2  | 0 | 0 | 0 | 0 |
| hugin-RG left 1   | 0 | 0 | 0 | 0 |
| hugin-RG left 2   | 0 | 0 | 0 | 0 |
| hugin-VNC right 1 | 0 | 0 | 0 | 0 |
| hugin-VNC right 2 | 0 | 0 | 0 | 0 |
| hugin-VNC left 1  | 0 | 0 | 0 | 0 |
| hugin-VNC left 2  | 0 | 0 | 0 | 0 |
| hugin-PH right 1  | 0 | 0 | 0 | 0 |
| hugin-PH right 2  | 0 | 0 | 0 | 0 |
| hugin-PH left 1   | 0 | 0 | 0 | 0 |
| hugin-PH left 2   | 0 | 0 | 0 | 0 |

## F DH44-producing mNSCs

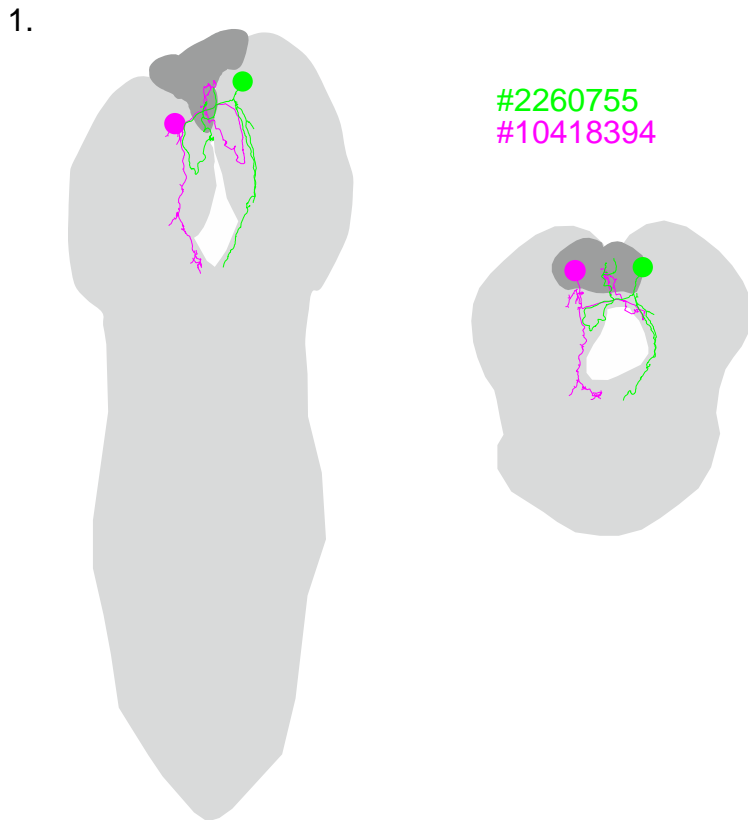

|                   | synapses to |   | synapses from |   |
|-------------------|-------------|---|---------------|---|
| hugin-PC right 1  | 0           | 0 | 0             | 0 |
| hugin-PC right 2  | 0           | 0 | 1             | 0 |
| hugin-PC right 3  | 0           | 0 | 1             | 0 |
| hugin-PC right 4  | 0           | 0 | 0             | 0 |
| hugin-PC left 1   | 0           | 0 | 0             | 1 |
| hugin-PC left 2   | 0           | 0 | 0             | 0 |
| hugin-PC left 3   | 0           | 0 | 0             | 2 |
| hugin-PC left 4   | 0           | 0 | 0             | 0 |
| hugin-RG right 1  | 0           | 0 | 0             | 0 |
| hugin-RG right 2  | 0           | 0 | 0             | 0 |
| hugin-RG left 1   | 0           | 0 | 0             | 0 |
| hugin-RG left 2   | 0           | 0 | 0             | 0 |
| hugin-VNC right 1 | 0           | 0 | 0             | 0 |
| hugin-VNC right 2 | 0           | 0 | 0             | 0 |
| hugin-VNC left 1  | 0           | 0 | 0             | 0 |
| hugin-VNC left 2  | 0           | 0 | 0             | 0 |
| hugin-PH right 1  | 0           | 0 | 0             | 0 |
| hugin-PH right 2  | 0           | 0 | 0             | 0 |
| hugin-PH left 1   | 0           | 0 | 0             | 0 |
| hugin-PH left 2   | 0           | 0 | 0             | 0 |

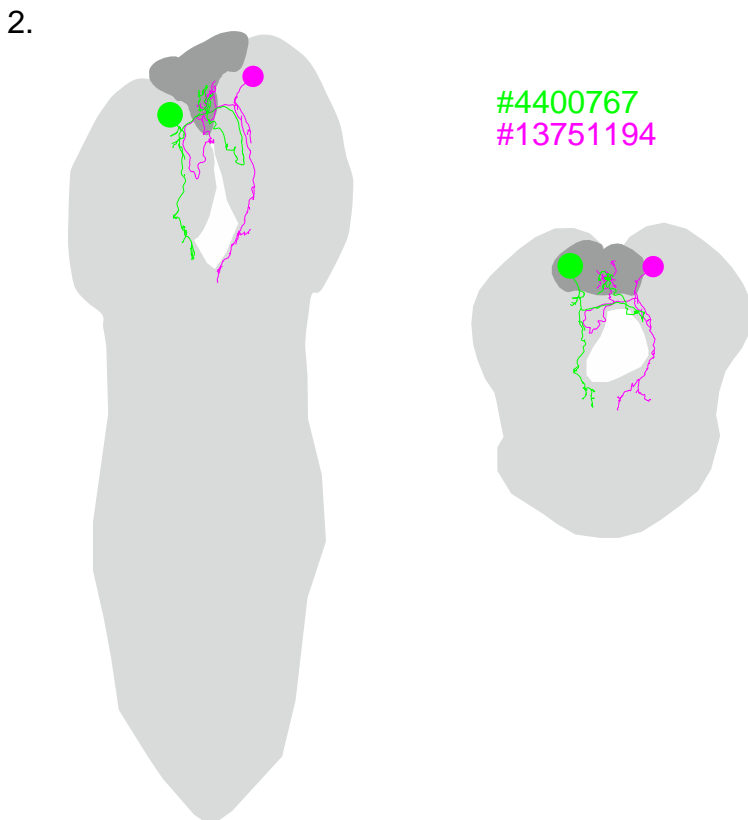

|                   | synapses to |   | synapses from |   |
|-------------------|-------------|---|---------------|---|
| hugin-PC right 1  | 0           | 0 | 0             | 0 |
| hugin-PC right 2  | 0           | 0 | 0             | 0 |
| hugin-PC right 3  | 0           | 0 | 0             | 0 |
| hugin-PC right 4  | 0           | 0 | 0             | 0 |
| hugin-PC left 1   | 0           | 0 | 0             | 0 |
| hugin-PC left 2   | 0           | 0 | 0             | 0 |
| hugin-PC left 3   | 0           | 0 | 1             | 0 |
| hugin-PC left 4   | 0           | 0 | 0             | 0 |
| hugin-RG right 1  | 0           | 0 | 0             | 0 |
| hugin-RG right 2  | 0           | 0 | 0             | 1 |
| hugin-RG left 1   | 0           | 0 | 0             | 0 |
| hugin-RG left 2   | 0           | 0 | 0             | 0 |
| hugin-VNC right 1 | 0           | 0 | 0             | 0 |
| hugin-VNC right 2 | 0           | 0 | 0             | 0 |
| hugin-VNC left 1  | 0           | 0 | 0             | 0 |
| hugin-VNC left 2  | 0           | 0 | 0             | 0 |
| hugin-PH right 1  | 0           | 0 | 0             | 0 |
| hugin-PH right 2  | 0           | 0 | 0             | 0 |
| hugin-PH left 1   | 0           | 0 | 0             | 0 |
| hugin-PH left 2   | 0           | 0 | 0             | 0 |

3.

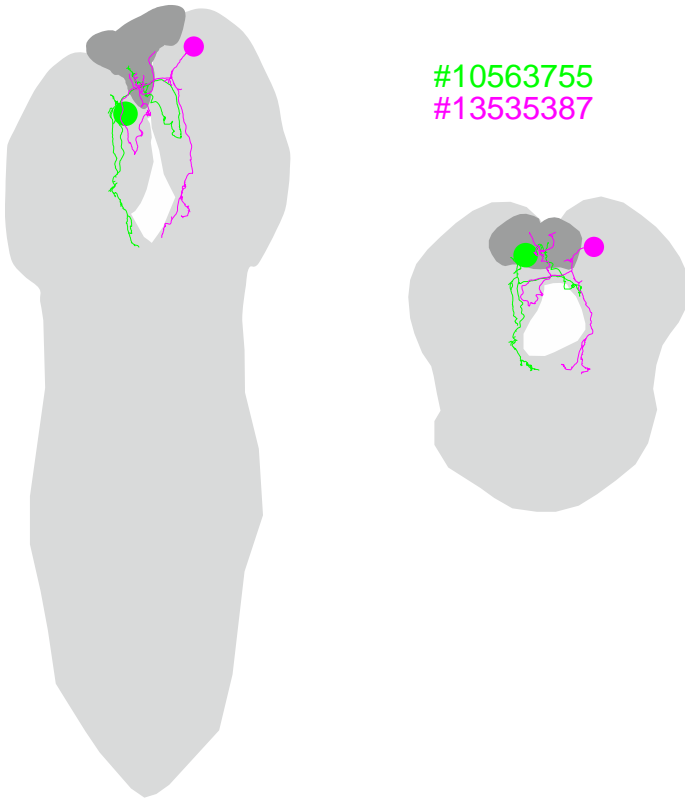

#10563755  
#13535387

synapses to

synapses from

|                   |   |   |   |   |
|-------------------|---|---|---|---|
| hugin-PC right 1  | 0 | 0 | 0 | 0 |
| hugin-PC right 2  | 0 | 0 | 0 | 0 |
| hugin-PC right 3  | 0 | 0 | 0 | 0 |
| hugin-PC right 4  | 0 | 0 | 0 | 0 |
| hugin-PC left 1   | 0 | 0 | 0 | 0 |
| hugin-PC left 2   | 0 | 0 | 0 | 0 |
| hugin-PC left 3   | 0 | 0 | 0 | 0 |
| hugin-PC left 4   | 0 | 0 | 0 | 0 |
| hugin-RG right 1  | 0 | 0 | 0 | 0 |
| hugin-RG right 2  | 0 | 0 | 0 | 0 |
| hugin-RG left 1   | 0 | 0 | 0 | 0 |
| hugin-RG left 2   | 0 | 0 | 0 | 0 |
| hugin-VNC right 1 | 0 | 0 | 0 | 0 |
| hugin-VNC right 2 | 0 | 0 | 0 | 0 |
| hugin-VNC left 1  | 0 | 0 | 0 | 0 |
| hugin-VNC left 2  | 0 | 0 | 0 | 0 |
| hugin-PH right 1  | 0 | 0 | 0 | 0 |
| hugin-PH right 2  | 0 | 0 | 0 | 0 |
| hugin-PH left 1   | 0 | 0 | 0 | 0 |
| hugin-PH left 2   | 0 | 0 | 0 | 0 |

## G DMS-producing mNSCs

1.

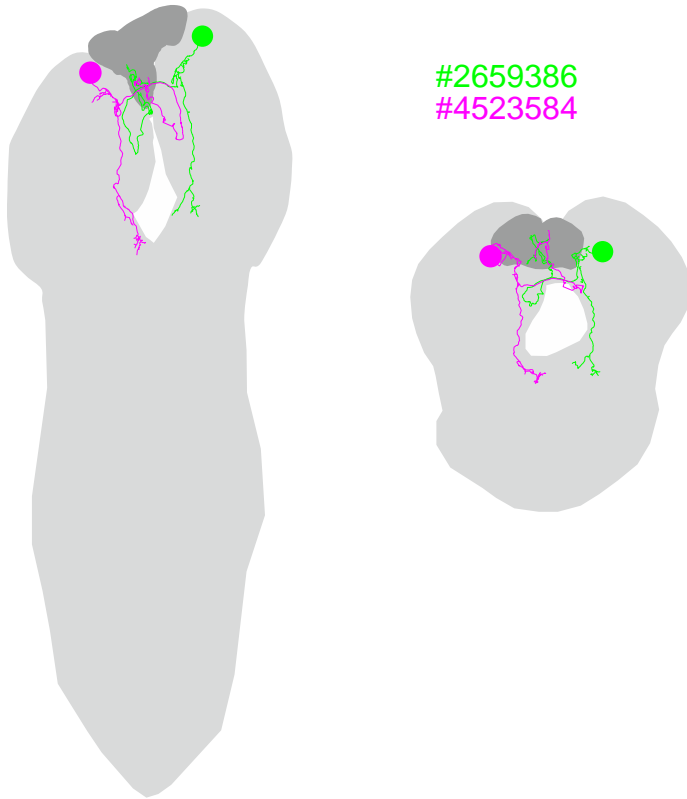

#2659386  
#4523584

synapses to

synapses from

|                   |   |   |   |   |
|-------------------|---|---|---|---|
| hugin-PC right 1  | 0 | 0 | 0 | 0 |
| hugin-PC right 2  | 0 | 0 | 0 | 0 |
| hugin-PC right 3  | 0 | 0 | 0 | 0 |
| hugin-PC right 4  | 0 | 0 | 1 | 0 |
| hugin-PC left 1   | 0 | 0 | 0 | 1 |
| hugin-PC left 2   | 0 | 0 | 0 | 3 |
| hugin-PC left 3   | 0 | 0 | 0 | 0 |
| hugin-PC left 4   | 0 | 0 | 0 | 3 |
| hugin-RG right 1  | 0 | 0 | 0 | 0 |
| hugin-RG right 2  | 0 | 0 | 0 | 0 |
| hugin-RG left 1   | 0 | 0 | 0 | 0 |
| hugin-RG left 2   | 0 | 0 | 0 | 0 |
| hugin-VNC right 1 | 0 | 0 | 0 | 0 |
| hugin-VNC right 2 | 0 | 0 | 0 | 0 |
| hugin-VNC left 1  | 0 | 0 | 0 | 0 |
| hugin-VNC left 2  | 0 | 0 | 0 | 0 |
| hugin-PH right 1  | 0 | 0 | 0 | 0 |
| hugin-PH right 2  | 0 | 0 | 0 | 0 |
| hugin-PH left 1   | 0 | 0 | 0 | 0 |
| hugin-PH left 2   | 0 | 0 | 0 | 0 |

2.

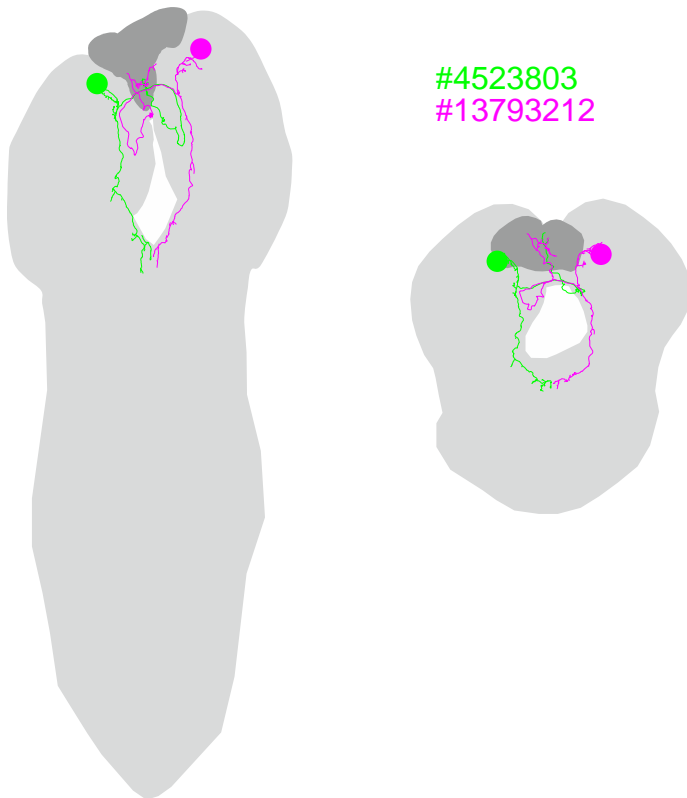

#4523803  
#13793212

synapses to

synapses from

|                   |   |   |   |   |
|-------------------|---|---|---|---|
| hugin-PC right 1  | 0 | 0 | 0 | 0 |
| hugin-PC right 2  | 0 | 0 | 0 | 0 |
| hugin-PC right 3  | 0 | 0 | 0 | 0 |
| hugin-PC right 4  | 0 | 0 | 0 | 0 |
| hugin-PC left 1   | 0 | 0 | 1 | 0 |
| hugin-PC left 2   | 0 | 0 | 0 | 0 |
| hugin-PC left 3   | 0 | 0 | 2 | 0 |
| hugin-PC left 4   | 0 | 0 | 0 | 0 |
| hugin-RG right 1  | 0 | 0 | 0 | 0 |
| hugin-RG right 2  | 0 | 0 | 0 | 0 |
| hugin-RG left 1   | 0 | 0 | 0 | 0 |
| hugin-RG left 2   | 0 | 0 | 0 | 0 |
| hugin-VNC right 1 | 0 | 0 | 0 | 0 |
| hugin-VNC right 2 | 0 | 0 | 0 | 0 |
| hugin-VNC left 1  | 0 | 0 | 0 | 0 |
| hugin-VNC left 2  | 0 | 0 | 0 | 0 |
| hugin-PH right 1  | 0 | 0 | 0 | 0 |
| hugin-PH right 2  | 0 | 0 | 0 | 0 |
| hugin-PH left 1   | 0 | 0 | 0 | 0 |
| hugin-PH left 2   | 0 | 0 | 0 | 0 |

# H AN sensory neurons

1.

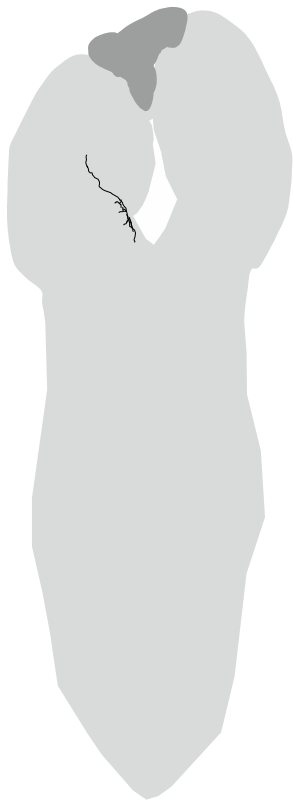

#1435466

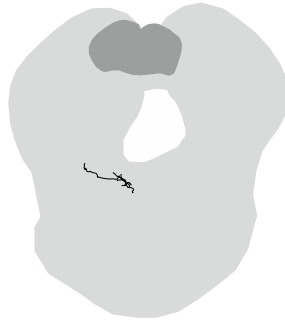

synapses to

synapses from

|                   |   |   |
|-------------------|---|---|
| hugin-PC right 1  | 0 | 0 |
| hugin-PC right 2  | 0 | 0 |
| hugin-PC right 3  | 0 | 0 |
| hugin-PC right 4  | 0 | 0 |
| hugin-PC left 1   | 3 | 0 |
| hugin-PC left 2   | 1 | 0 |
| hugin-PC left 3   | 2 | 0 |
| hugin-PC left 4   | 0 | 0 |
| hugin-RG right 1  | 0 | 0 |
| hugin-RG right 2  | 0 | 0 |
| hugin-RG left 1   | 0 | 0 |
| hugin-RG left 2   | 0 | 0 |
| hugin-VNC right 1 | 0 | 0 |
| hugin-VNC right 2 | 1 | 0 |
| hugin-VNC left 1  | 0 | 0 |
| hugin-VNC left 2  | 0 | 0 |
| hugin-PH right 1  | 0 | 0 |
| hugin-PH right 2  | 0 | 0 |
| hugin-PH left 1   | 0 | 0 |
| hugin-PH left 2   | 0 | 0 |

2.

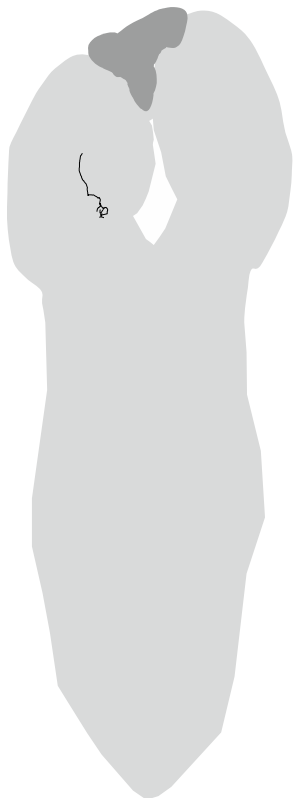

#15997957

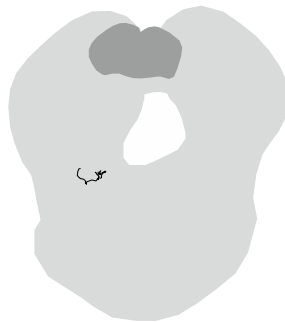

synapses to

synapses from

|                   |   |   |
|-------------------|---|---|
| hugin-PC right 1  | 0 | 0 |
| hugin-PC right 2  | 0 | 0 |
| hugin-PC right 3  | 0 | 0 |
| hugin-PC right 4  | 0 | 0 |
| hugin-PC left 1   | 3 | 0 |
| hugin-PC left 2   | 0 | 0 |
| hugin-PC left 3   | 0 | 0 |
| hugin-PC left 4   | 0 | 0 |
| hugin-RG right 1  | 0 | 0 |
| hugin-RG right 2  | 0 | 0 |
| hugin-RG left 1   | 0 | 0 |
| hugin-RG left 2   | 0 | 0 |
| hugin-VNC right 1 | 0 | 0 |
| hugin-VNC right 2 | 0 | 0 |
| hugin-VNC left 1  | 0 | 0 |
| hugin-VNC left 2  | 0 | 0 |
| hugin-PH right 1  | 0 | 0 |
| hugin-PH right 2  | 0 | 0 |
| hugin-PH left 1   | 0 | 0 |
| hugin-PH left 2   | 0 | 0 |

3.

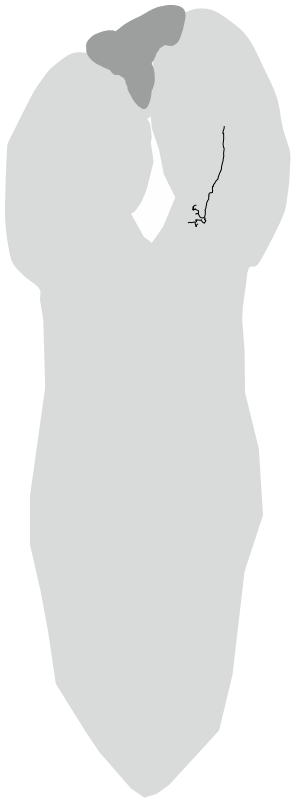

#15532105

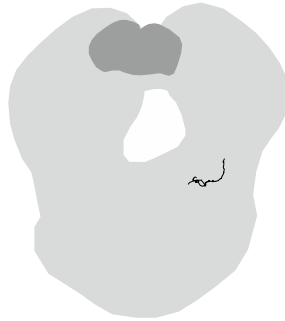

synapses to

synapses from

|                   |   |   |
|-------------------|---|---|
| hugin-PC right 1  | 0 | 0 |
| hugin-PC right 2  | 0 | 0 |
| hugin-PC right 3  | 0 | 0 |
| hugin-PC right 4  | 3 | 0 |
| hugin-PC left 1   | 0 | 0 |
| hugin-PC left 2   | 0 | 0 |
| hugin-PC left 3   | 0 | 0 |
| hugin-PC left 4   | 0 | 0 |
| hugin-RG right 1  | 0 | 0 |
| hugin-RG right 2  | 0 | 0 |
| hugin-RG left 1   | 0 | 0 |
| hugin-RG left 2   | 0 | 0 |
| hugin-VNC right 1 | 0 | 0 |
| hugin-VNC right 2 | 0 | 0 |
| hugin-VNC left 1  | 0 | 0 |
| hugin-VNC left 2  | 0 | 0 |
| hugin-PH right 1  | 0 | 0 |
| hugin-PH right 2  | 0 | 0 |
| hugin-PH left 1   | 0 | 0 |
| hugin-PH left 2   | 0 | 0 |

4.

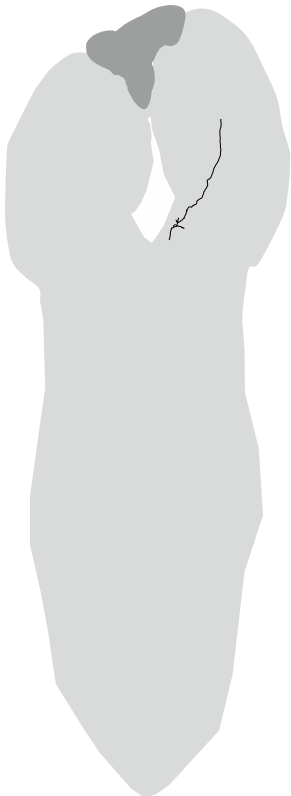

#15564807

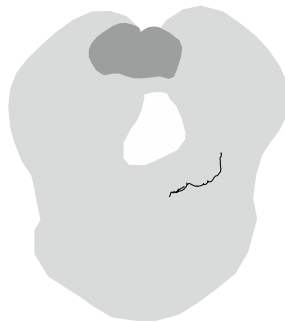

synapses to

synapses from

|                   |   |   |
|-------------------|---|---|
| hugin-PC right 1  | 2 | 0 |
| hugin-PC right 2  | 1 | 0 |
| hugin-PC right 3  | 3 | 0 |
| hugin-PC right 4  | 0 | 0 |
| hugin-PC left 1   | 0 | 0 |
| hugin-PC left 2   | 0 | 0 |
| hugin-PC left 3   | 0 | 0 |
| hugin-PC left 4   | 0 | 0 |
| hugin-RG right 1  | 0 | 0 |
| hugin-RG right 2  | 0 | 0 |
| hugin-RG left 1   | 0 | 0 |
| hugin-RG left 2   | 0 | 0 |
| hugin-VNC right 1 | 0 | 0 |
| hugin-VNC right 2 | 0 | 0 |
| hugin-VNC left 1  | 0 | 0 |
| hugin-VNC left 2  | 0 | 0 |
| hugin-PH right 1  | 0 | 0 |
| hugin-PH right 2  | 0 | 0 |
| hugin-PH left 1   | 0 | 0 |
| hugin-PH left 2   | 0 | 0 |

5.

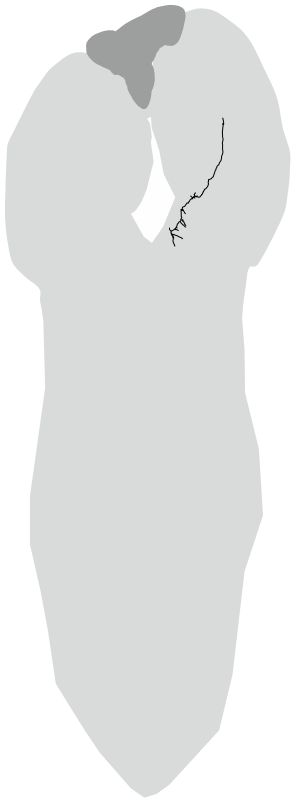

#15574328

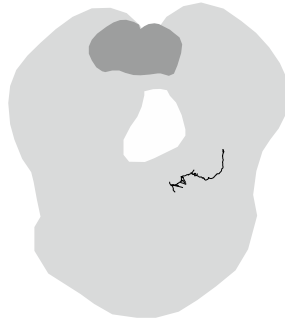

synapses to

synapses from

|                   |   |   |
|-------------------|---|---|
| hugin-PC right 1  | 3 | 1 |
| hugin-PC right 2  | 1 | 0 |
| hugin-PC right 3  | 0 | 0 |
| hugin-PC right 4  | 3 | 1 |
| hugin-PC left 1   | 0 | 0 |
| hugin-PC left 2   | 0 | 0 |
| hugin-PC left 3   | 0 | 0 |
| hugin-PC left 4   | 0 | 0 |
| hugin-RG right 1  | 0 | 0 |
| hugin-RG right 2  | 0 | 0 |
| hugin-RG left 1   | 0 | 0 |
| hugin-RG left 2   | 0 | 0 |
| hugin-VNC right 1 | 0 | 0 |
| hugin-VNC right 2 | 0 | 0 |
| hugin-VNC left 1  | 0 | 0 |
| hugin-VNC left 2  | 0 | 0 |
| hugin-PH right 1  | 0 | 0 |
| hugin-PH right 2  | 0 | 0 |
| hugin-PH left 1   | 0 | 0 |
| hugin-PH left 2   | 0 | 0 |

6.

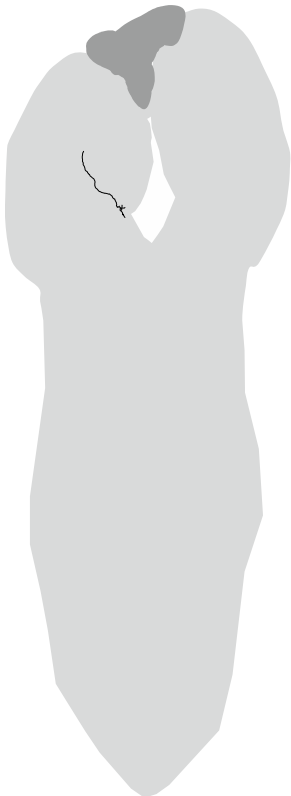

#1428271

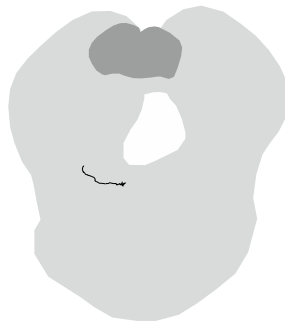

synapses to

synapses from

|                   |   |   |
|-------------------|---|---|
| hugin-PC right 1  | 0 | 0 |
| hugin-PC right 2  | 0 | 0 |
| hugin-PC right 3  | 0 | 0 |
| hugin-PC right 4  | 0 | 0 |
| hugin-PC left 1   | 4 | 0 |
| hugin-PC left 2   | 0 | 0 |
| hugin-PC left 3   | 0 | 0 |
| hugin-PC left 4   | 1 | 0 |
| hugin-RG right 1  | 0 | 0 |
| hugin-RG right 2  | 0 | 0 |
| hugin-RG left 1   | 0 | 0 |
| hugin-RG left 2   | 0 | 0 |
| hugin-VNC right 1 | 0 | 0 |
| hugin-VNC right 2 | 1 | 0 |
| hugin-VNC left 1  | 0 | 0 |
| hugin-VNC left 2  | 0 | 0 |
| hugin-PH right 1  | 0 | 0 |
| hugin-PH right 2  | 0 | 0 |
| hugin-PH left 1   | 0 | 0 |
| hugin-PH left 2   | 0 | 0 |

7.

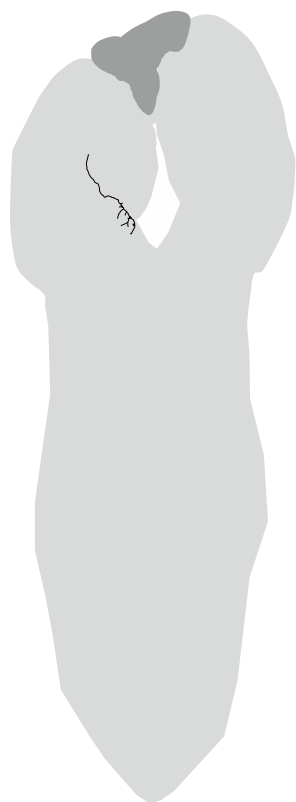

#1375101

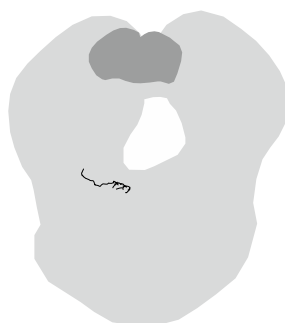

synapses to

synapses from

|                   |   |   |
|-------------------|---|---|
| hugin-PC right 1  | 0 | 0 |
| hugin-PC right 2  | 0 | 0 |
| hugin-PC right 3  | 0 | 0 |
| hugin-PC right 4  | 0 | 0 |
| hugin-PC left 1   | 0 | 0 |
| hugin-PC left 2   | 0 | 0 |
| hugin-PC left 3   | 0 | 0 |
| hugin-PC left 4   | 2 | 0 |
| hugin-RG right 1  | 0 | 0 |
| hugin-RG right 2  | 0 | 0 |
| hugin-RG left 1   | 0 | 0 |
| hugin-RG left 2   | 0 | 0 |
| hugin-VNC right 1 | 0 | 0 |
| hugin-VNC right 2 | 0 | 0 |
| hugin-VNC left 1  | 0 | 0 |
| hugin-VNC left 2  | 0 | 0 |
| hugin-PH right 1  | 0 | 0 |
| hugin-PH right 2  | 0 | 0 |
| hugin-PH left 1   | 0 | 0 |
| hugin-PH left 2   | 0 | 0 |

8.

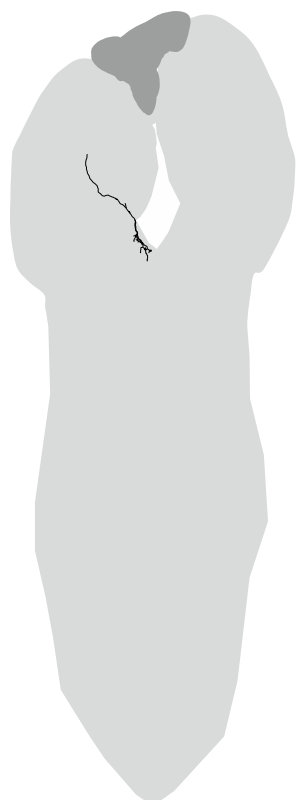

#1405493

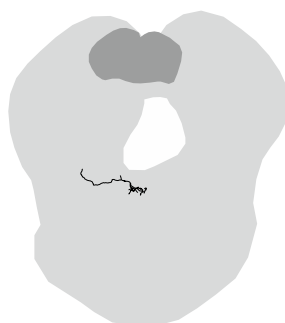

synapses to

synapses from

|                   |   |   |
|-------------------|---|---|
| hugin-PC right 1  | 0 | 0 |
| hugin-PC right 2  | 0 | 0 |
| hugin-PC right 3  | 0 | 0 |
| hugin-PC right 4  | 0 | 0 |
| hugin-PC left 1   | 1 | 0 |
| hugin-PC left 2   | 1 | 0 |
| hugin-PC left 3   | 0 | 0 |
| hugin-PC left 4   | 3 | 0 |
| hugin-RG right 1  | 0 | 0 |
| hugin-RG right 2  | 0 | 0 |
| hugin-RG left 1   | 0 | 0 |
| hugin-RG left 2   | 0 | 0 |
| hugin-VNC right 1 | 3 | 0 |
| hugin-VNC right 2 | 0 | 0 |
| hugin-VNC left 1  | 1 | 0 |
| hugin-VNC left 2  | 0 | 0 |
| hugin-PH right 1  | 0 | 0 |
| hugin-PH right 2  | 0 | 0 |
| hugin-PH left 1   | 0 | 0 |
| hugin-PH left 2   | 0 | 0 |



9.

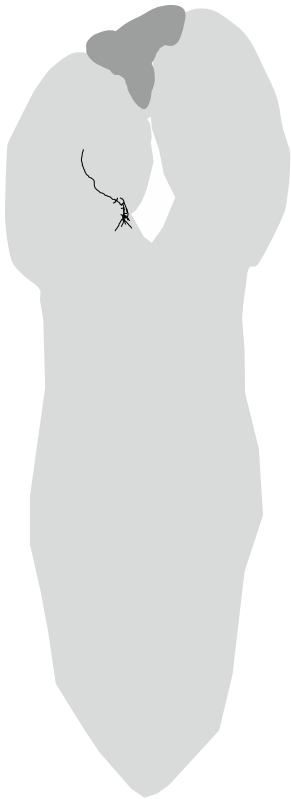

#15769680

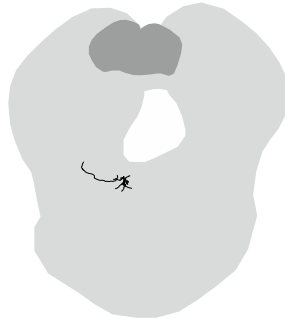

synapses to

synapses from

|                   |   |   |
|-------------------|---|---|
| hugin-PC right 1  | 0 | 0 |
| hugin-PC right 2  | 0 | 0 |
| hugin-PC right 3  | 0 | 0 |
| hugin-PC right 4  | 0 | 0 |
| hugin-PC left 1   | 1 | 0 |
| hugin-PC left 2   | 0 | 0 |
| hugin-PC left 3   | 2 | 0 |
| hugin-PC left 4   | 2 | 0 |
| hugin-RG right 1  | 0 | 0 |
| hugin-RG right 2  | 0 | 0 |
| hugin-RG left 1   | 0 | 0 |
| hugin-RG left 2   | 0 | 0 |
| hugin-VNC right 1 | 0 | 0 |
| hugin-VNC right 2 | 0 | 0 |
| hugin-VNC left 1  | 0 | 0 |
| hugin-VNC left 2  | 0 | 0 |
| hugin-PH right 1  | 0 | 0 |
| hugin-PH right 2  | 0 | 0 |
| hugin-PH left 1   | 0 | 0 |
| hugin-PH left 2   | 0 | 0 |

10.

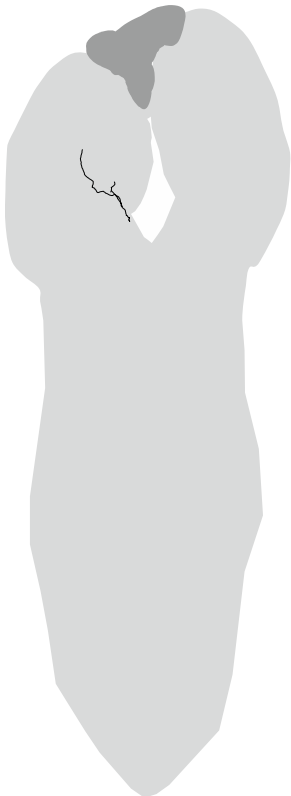

#1367171

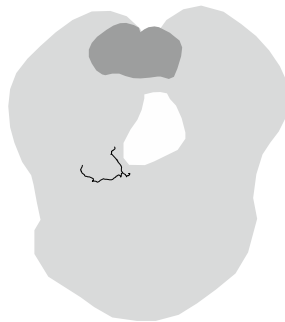

synapses to

synapses from

|                   |   |   |
|-------------------|---|---|
| hugin-PC right 1  | 0 | 0 |
| hugin-PC right 2  | 0 | 0 |
| hugin-PC right 3  | 0 | 0 |
| hugin-PC right 4  | 0 | 0 |
| hugin-PC left 1   | 0 | 0 |
| hugin-PC left 2   | 0 | 0 |
| hugin-PC left 3   | 0 | 0 |
| hugin-PC left 4   | 0 | 0 |
| hugin-RG right 1  | 0 | 0 |
| hugin-RG right 2  | 0 | 0 |
| hugin-RG left 1   | 0 | 0 |
| hugin-RG left 2   | 0 | 0 |
| hugin-VNC right 1 | 3 | 0 |
| hugin-VNC right 2 | 1 | 0 |
| hugin-VNC left 1  | 3 | 0 |
| hugin-VNC left 2  | 0 | 0 |
| hugin-PH right 1  | 0 | 0 |
| hugin-PH right 2  | 0 | 0 |
| hugin-PH left 1   | 0 | 0 |
| hugin-PH left 2   | 0 | 0 |

11.

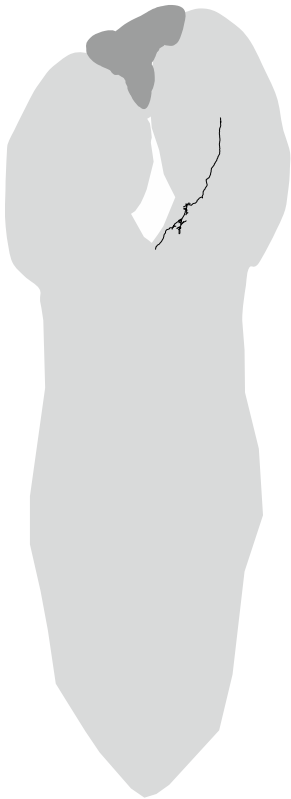

#15564706

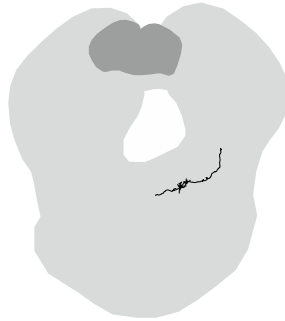

synapses to

synapses from

|                   |   |   |
|-------------------|---|---|
| hugin-PC right 1  | 0 | 0 |
| hugin-PC right 2  | 1 | 0 |
| hugin-PC right 3  | 1 | 0 |
| hugin-PC right 4  | 1 | 0 |
| hugin-PC left 1   | 0 | 0 |
| hugin-PC left 2   | 0 | 0 |
| hugin-PC left 3   | 0 | 0 |
| hugin-PC left 4   | 0 | 0 |
| hugin-RG right 1  | 0 | 0 |
| hugin-RG right 2  | 0 | 0 |
| hugin-RG left 1   | 0 | 0 |
| hugin-RG left 2   | 0 | 0 |
| hugin-VNC right 1 | 0 | 0 |
| hugin-VNC right 2 | 0 | 0 |
| hugin-VNC left 1  | 0 | 0 |
| hugin-VNC left 2  | 0 | 0 |
| hugin-PH right 1  | 0 | 0 |
| hugin-PH right 2  | 0 | 0 |
| hugin-PH left 1   | 0 | 0 |
| hugin-PH left 2   | 0 | 0 |

12.

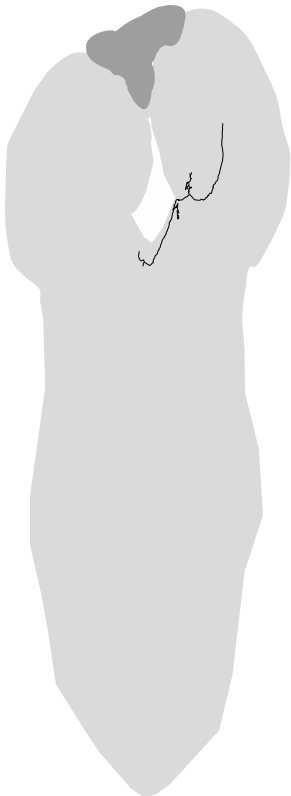

#15541944

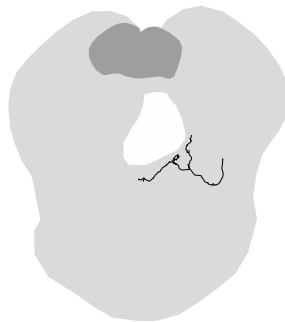

synapses to

synapses from

|                   |   |   |
|-------------------|---|---|
| hugin-PC right 1  | 0 | 0 |
| hugin-PC right 2  | 0 | 0 |
| hugin-PC right 3  | 0 | 0 |
| hugin-PC right 4  | 0 | 0 |
| hugin-PC left 1   | 0 | 0 |
| hugin-PC left 2   | 0 | 0 |
| hugin-PC left 3   | 0 | 0 |
| hugin-PC left 4   | 0 | 0 |
| hugin-RG right 1  | 0 | 0 |
| hugin-RG right 2  | 0 | 0 |
| hugin-RG left 1   | 0 | 0 |
| hugin-RG left 2   | 1 | 0 |
| hugin-VNC right 1 | 0 | 0 |
| hugin-VNC right 2 | 1 | 0 |
| hugin-VNC left 1  | 0 | 0 |
| hugin-VNC left 2  | 0 | 0 |
| hugin-PH right 1  | 0 | 0 |
| hugin-PH right 2  | 0 | 0 |
| hugin-PH left 1   | 0 | 0 |
| hugin-PH left 2   | 0 | 0 |

13.

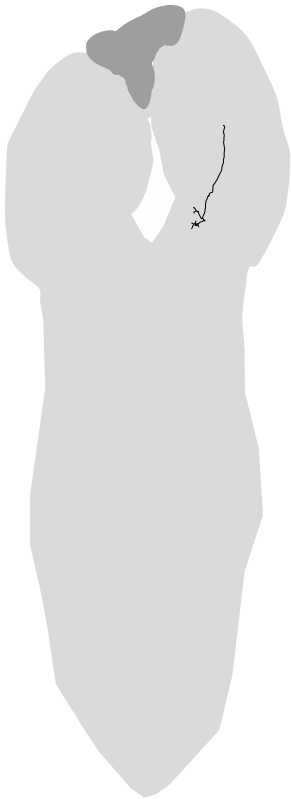

#3192952

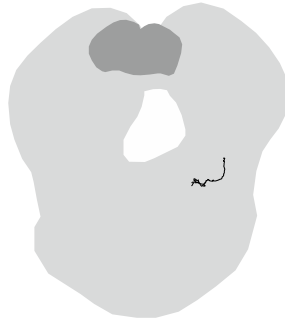

synapses to

synapses from

|                   |   |   |
|-------------------|---|---|
| hugin-PC right 1  | 0 | 0 |
| hugin-PC right 2  | 0 | 0 |
| hugin-PC right 3  | 0 | 0 |
| hugin-PC right 4  | 2 | 0 |
| hugin-PC left 1   | 0 | 0 |
| hugin-PC left 2   | 0 | 0 |
| hugin-PC left 3   | 0 | 0 |
| hugin-PC left 4   | 0 | 0 |
| hugin-RG right 1  | 0 | 0 |
| hugin-RG right 2  | 0 | 0 |
| hugin-RG left 1   | 0 | 0 |
| hugin-RG left 2   | 0 | 0 |
| hugin-VNC right 1 | 0 | 0 |
| hugin-VNC right 2 | 0 | 0 |
| hugin-VNC left 1  | 0 | 0 |
| hugin-VNC left 2  | 0 | 0 |
| hugin-PH right 1  | 0 | 0 |
| hugin-PH right 2  | 0 | 0 |
| hugin-PH left 1   | 0 | 0 |
| hugin-PH left 2   | 0 | 0 |

14.

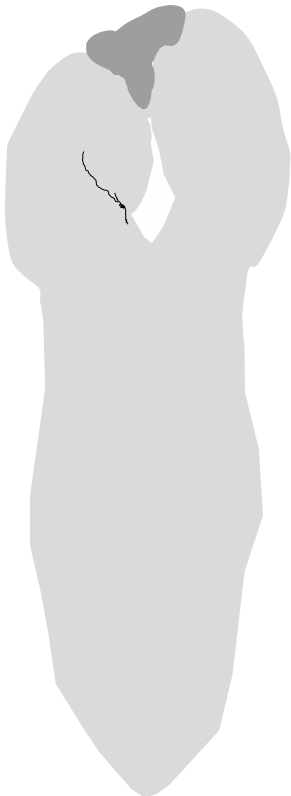

#1429969

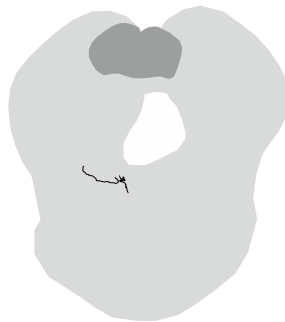

synapses to

synapses from

|                   |   |   |
|-------------------|---|---|
| hugin-PC right 1  | 0 | 0 |
| hugin-PC right 2  | 0 | 0 |
| hugin-PC right 3  | 0 | 0 |
| hugin-PC right 4  | 0 | 0 |
| hugin-PC left 1   | 0 | 0 |
| hugin-PC left 2   | 1 | 0 |
| hugin-PC left 3   | 2 | 0 |
| hugin-PC left 4   | 1 | 0 |
| hugin-RG right 1  | 0 | 0 |
| hugin-RG right 2  | 0 | 0 |
| hugin-RG left 1   | 0 | 0 |
| hugin-RG left 2   | 0 | 0 |
| hugin-VNC right 1 | 0 | 0 |
| hugin-VNC right 2 | 0 | 0 |
| hugin-VNC left 1  | 0 | 0 |
| hugin-VNC left 2  | 0 | 0 |
| hugin-PH right 1  | 0 | 0 |
| hugin-PH right 2  | 0 | 0 |
| hugin-PH left 1   | 0 | 0 |
| hugin-PH left 2   | 0 | 0 |

15.

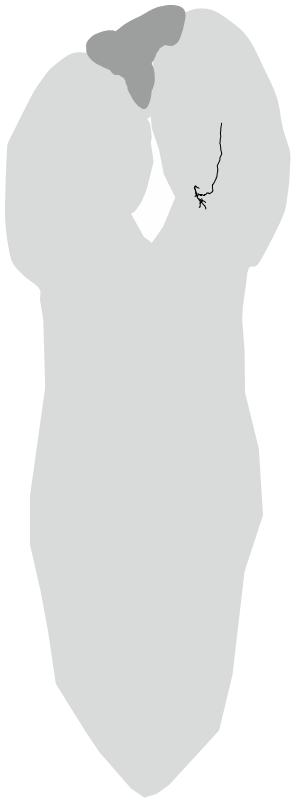

#15506094

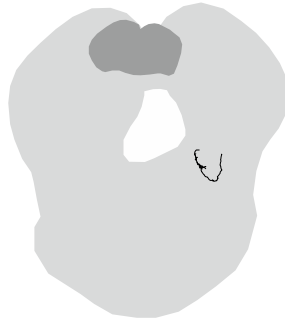

synapses to

synapses from

|                   |   |   |
|-------------------|---|---|
| hugin-PC right 1  | 0 | 0 |
| hugin-PC right 2  | 0 | 0 |
| hugin-PC right 3  | 6 | 0 |
| hugin-PC right 4  | 0 | 0 |
| hugin-PC left 1   | 0 | 0 |
| hugin-PC left 2   | 0 | 0 |
| hugin-PC left 3   | 0 | 0 |
| hugin-PC left 4   | 0 | 0 |
| hugin-RG right 1  | 0 | 0 |
| hugin-RG right 2  | 0 | 0 |
| hugin-RG left 1   | 0 | 0 |
| hugin-RG left 2   | 0 | 0 |
| hugin-VNC right 1 | 0 | 0 |
| hugin-VNC right 2 | 0 | 0 |
| hugin-VNC left 1  | 0 | 0 |
| hugin-VNC left 2  | 0 | 0 |
| hugin-PH right 1  | 0 | 0 |
| hugin-PH right 2  | 0 | 0 |
| hugin-PH left 1   | 0 | 0 |
| hugin-PH left 2   | 0 | 0 |

16.

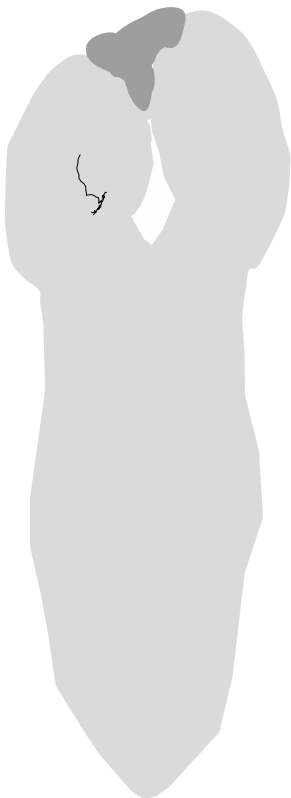

#1706716

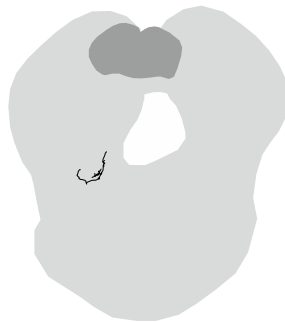

synapses to

synapses from

|                   |   |   |
|-------------------|---|---|
| hugin-PC right 1  | 0 | 0 |
| hugin-PC right 2  | 0 | 0 |
| hugin-PC right 3  | 0 | 0 |
| hugin-PC right 4  | 0 | 0 |
| hugin-PC left 1   | 2 | 0 |
| hugin-PC left 2   | 0 | 0 |
| hugin-PC left 3   | 0 | 0 |
| hugin-PC left 4   | 0 | 0 |
| hugin-RG right 1  | 0 | 0 |
| hugin-RG right 2  | 0 | 0 |
| hugin-RG left 1   | 0 | 0 |
| hugin-RG left 2   | 0 | 0 |
| hugin-VNC right 1 | 0 | 0 |
| hugin-VNC right 2 | 0 | 0 |
| hugin-VNC left 1  | 0 | 0 |
| hugin-VNC left 2  | 0 | 0 |
| hugin-PH right 1  | 0 | 0 |
| hugin-PH right 2  | 0 | 0 |
| hugin-PH left 1   | 0 | 0 |
| hugin-PH left 2   | 0 | 0 |

17.

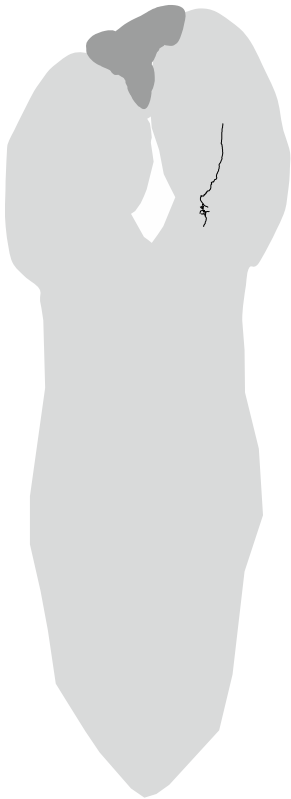

#15541976

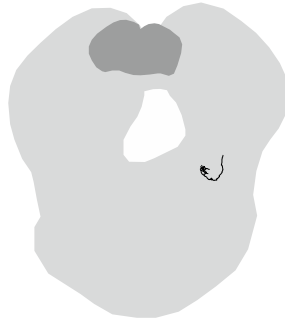

synapses to

synapses from

|                   |   |   |
|-------------------|---|---|
| hugin-PC right 1  | 0 | 0 |
| hugin-PC right 2  | 0 | 0 |
| hugin-PC right 3  | 2 | 0 |
| hugin-PC right 4  | 0 | 0 |
| hugin-PC left 1   | 0 | 0 |
| hugin-PC left 2   | 0 | 0 |
| hugin-PC left 3   | 0 | 0 |
| hugin-PC left 4   | 0 | 0 |
| hugin-RG right 1  | 0 | 0 |
| hugin-RG right 2  | 0 | 0 |
| hugin-RG left 1   | 0 | 0 |
| hugin-RG left 2   | 0 | 0 |
| hugin-VNC right 1 | 0 | 0 |
| hugin-VNC right 2 | 0 | 0 |
| hugin-VNC left 1  | 0 | 0 |
| hugin-VNC left 2  | 0 | 0 |
| hugin-PH right 1  | 0 | 0 |
| hugin-PH right 2  | 0 | 0 |
| hugin-PH left 1   | 0 | 0 |
| hugin-PH left 2   | 0 | 0 |

18.

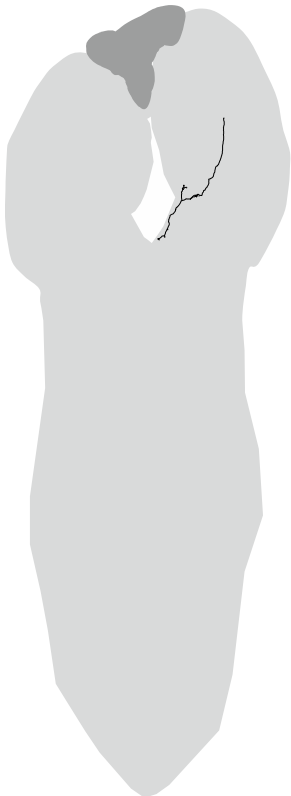

#15562137

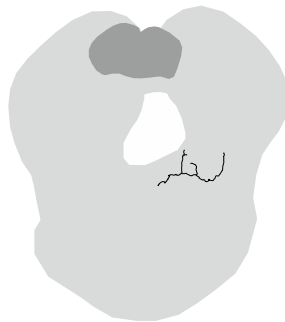

synapses to

synapses from

|                   |   |   |
|-------------------|---|---|
| hugin-PC right 1  | 0 | 0 |
| hugin-PC right 2  | 0 | 0 |
| hugin-PC right 3  | 1 | 0 |
| hugin-PC right 4  | 0 | 0 |
| hugin-PC left 1   | 0 | 0 |
| hugin-PC left 2   | 0 | 0 |
| hugin-PC left 3   | 0 | 0 |
| hugin-PC left 4   | 0 | 0 |
| hugin-RG right 1  | 0 | 0 |
| hugin-RG right 2  | 0 | 0 |
| hugin-RG left 1   | 0 | 0 |
| hugin-RG left 2   | 0 | 0 |
| hugin-VNC right 1 | 0 | 0 |
| hugin-VNC right 2 | 0 | 0 |
| hugin-VNC left 1  | 0 | 0 |
| hugin-VNC left 2  | 1 | 0 |
| hugin-PH right 1  | 0 | 0 |
| hugin-PH right 2  | 0 | 0 |
| hugin-PH left 1   | 0 | 0 |
| hugin-PH left 2   | 0 | 0 |

19.

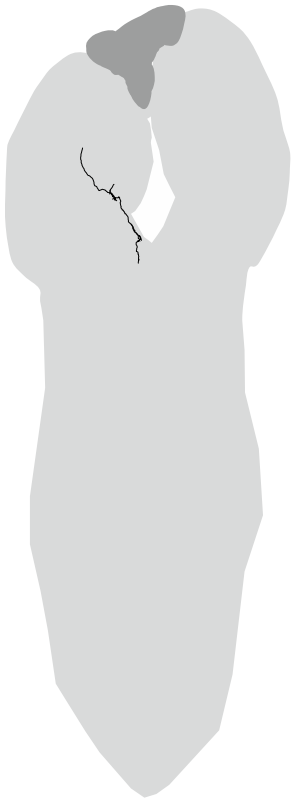

#1398253

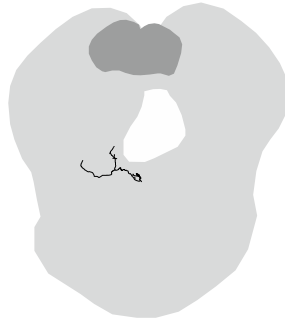

synapses to

synapses from

|                   |   |   |
|-------------------|---|---|
| hugin-PC right 1  | 0 | 0 |
| hugin-PC right 2  | 0 | 0 |
| hugin-PC right 3  | 0 | 0 |
| hugin-PC right 4  | 0 | 0 |
| hugin-PC left 1   | 0 | 0 |
| hugin-PC left 2   | 0 | 0 |
| hugin-PC left 3   | 0 | 0 |
| hugin-PC left 4   | 0 | 0 |
| hugin-RG right 1  | 0 | 0 |
| hugin-RG right 2  | 0 | 0 |
| hugin-RG left 1   | 0 | 0 |
| hugin-RG left 2   | 0 | 0 |
| hugin-VNC right 1 | 2 | 1 |
| hugin-VNC right 2 | 0 | 0 |
| hugin-VNC left 1  | 1 | 0 |
| hugin-VNC left 2  | 0 | 0 |
| hugin-PH right 1  | 0 | 0 |
| hugin-PH right 2  | 0 | 0 |
| hugin-PH left 1   | 0 | 0 |
| hugin-PH left 2   | 0 | 0 |

20.

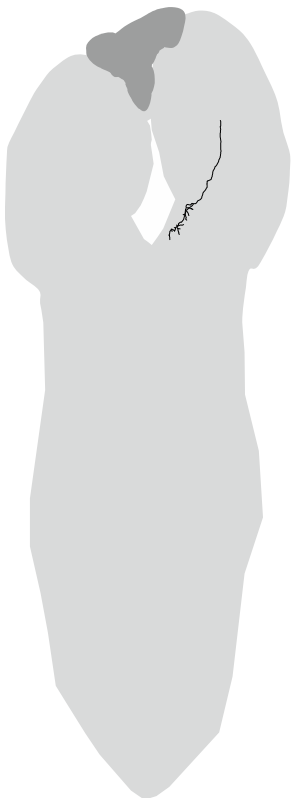

#15564782

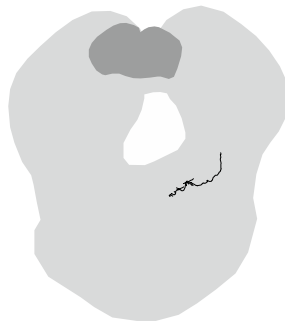

synapses to

synapses from

|                   |   |   |
|-------------------|---|---|
| hugin-PC right 1  | 3 | 0 |
| hugin-PC right 2  | 0 | 0 |
| hugin-PC right 3  | 0 | 0 |
| hugin-PC right 4  | 0 | 0 |
| hugin-PC left 1   | 0 | 0 |
| hugin-PC left 2   | 0 | 0 |
| hugin-PC left 3   | 0 | 0 |
| hugin-PC left 4   | 0 | 0 |
| hugin-RG right 1  | 0 | 0 |
| hugin-RG right 2  | 0 | 0 |
| hugin-RG left 1   | 0 | 0 |
| hugin-RG left 2   | 0 | 0 |
| hugin-VNC right 1 | 0 | 0 |
| hugin-VNC right 2 | 0 | 0 |
| hugin-VNC left 1  | 0 | 0 |
| hugin-VNC left 2  | 0 | 0 |
| hugin-PH right 1  | 0 | 0 |
| hugin-PH right 2  | 0 | 0 |
| hugin-PH left 1   | 0 | 0 |
| hugin-PH left 2   | 0 | 0 |

21.

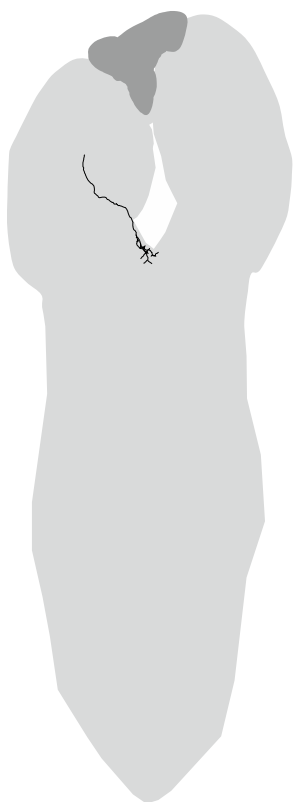

#15769419

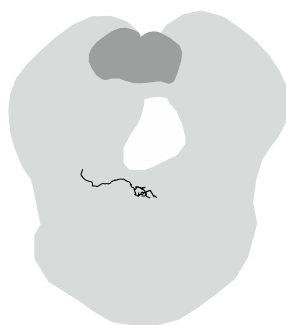

synapses to

synapses from

|                   |   |   |
|-------------------|---|---|
| hugin-PC right 1  | 0 | 0 |
| hugin-PC right 2  | 0 | 0 |
| hugin-PC right 3  | 0 | 0 |
| hugin-PC right 4  | 0 | 0 |
| hugin-PC left 1   | 0 | 0 |
| hugin-PC left 2   | 0 | 0 |
| hugin-PC left 3   | 1 | 0 |
| hugin-PC left 4   | 0 | 0 |
| hugin-RG right 1  | 0 | 0 |
| hugin-RG right 2  | 0 | 0 |
| hugin-RG left 1   | 0 | 0 |
| hugin-RG left 2   | 0 | 0 |
| hugin-VNC right 1 | 2 | 0 |
| hugin-VNC right 2 | 0 | 0 |
| hugin-VNC left 1  | 2 | 0 |
| hugin-VNC left 2  | 0 | 0 |
| hugin-PH right 1  | 0 | 0 |
| hugin-PH right 2  | 0 | 0 |
| hugin-PH left 1   | 0 | 0 |
| hugin-PH left 2   | 0 | 0 |

22.

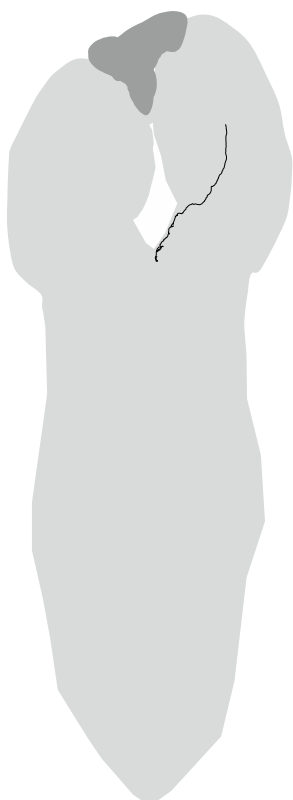

#15573396

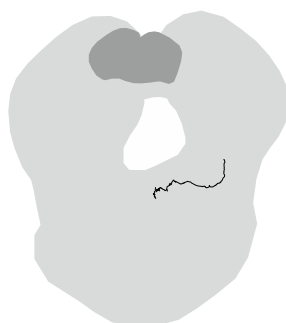

synapses to

synapses from

|                   |   |   |
|-------------------|---|---|
| hugin-PC right 1  | 3 | 0 |
| hugin-PC right 2  | 0 | 0 |
| hugin-PC right 3  | 0 | 0 |
| hugin-PC right 4  | 0 | 0 |
| hugin-PC left 1   | 0 | 0 |
| hugin-PC left 2   | 0 | 0 |
| hugin-PC left 3   | 0 | 0 |
| hugin-PC left 4   | 0 | 0 |
| hugin-RG right 1  | 0 | 0 |
| hugin-RG right 2  | 0 | 0 |
| hugin-RG left 1   | 0 | 0 |
| hugin-RG left 2   | 0 | 0 |
| hugin-VNC right 1 | 0 | 0 |
| hugin-VNC right 2 | 0 | 0 |
| hugin-VNC left 1  | 0 | 0 |
| hugin-VNC left 2  | 2 | 0 |
| hugin-PH right 1  | 0 | 0 |
| hugin-PH right 2  | 0 | 0 |
| hugin-PH left 1   | 0 | 0 |
| hugin-PH left 2   | 0 | 0 |

23.

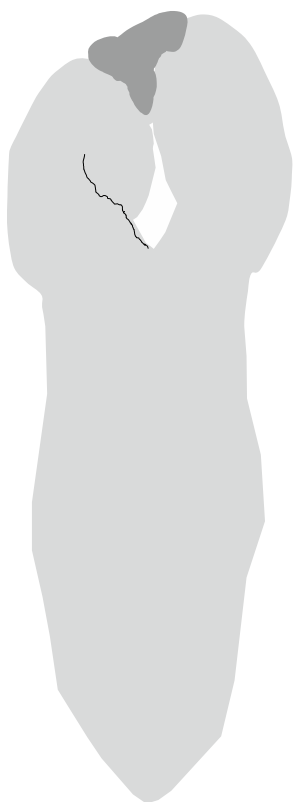

#1406463

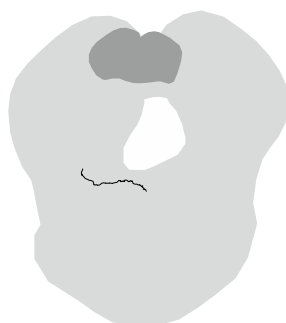

synapses to

synapses from

|                   |   |   |
|-------------------|---|---|
| hugin-PC right 1  | 0 | 0 |
| hugin-PC right 2  | 0 | 0 |
| hugin-PC right 3  | 0 | 0 |
| hugin-PC right 4  | 0 | 0 |
| hugin-PC left 1   | 0 | 0 |
| hugin-PC left 2   | 0 | 0 |
| hugin-PC left 3   | 0 | 0 |
| hugin-PC left 4   | 1 | 0 |
| hugin-RG right 1  | 0 | 0 |
| hugin-RG right 2  | 0 | 0 |
| hugin-RG left 1   | 0 | 0 |
| hugin-RG left 2   | 0 | 0 |
| hugin-VNC right 1 | 1 | 0 |
| hugin-VNC right 2 | 0 | 0 |
| hugin-VNC left 1  | 0 | 0 |
| hugin-VNC left 2  | 0 | 0 |
| hugin-PH right 1  | 0 | 0 |
| hugin-PH right 2  | 0 | 0 |
| hugin-PH left 1   | 0 | 0 |
| hugin-PH left 2   | 0 | 0 |

24.

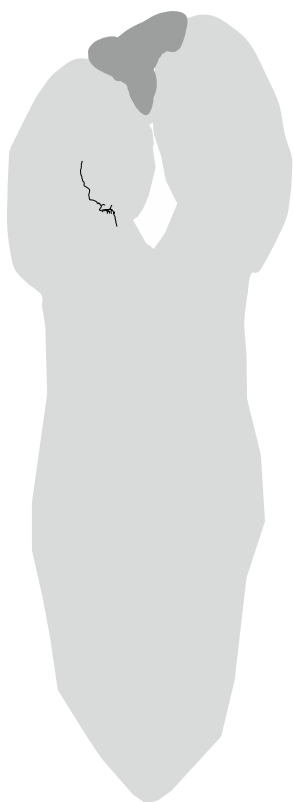

#15998753

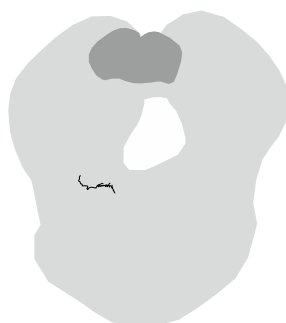

synapses to

synapses from

|                   |   |   |
|-------------------|---|---|
| hugin-PC right 1  | 0 | 0 |
| hugin-PC right 2  | 0 | 0 |
| hugin-PC right 3  | 0 | 0 |
| hugin-PC right 4  | 0 | 0 |
| hugin-PC left 1   | 3 | 0 |
| hugin-PC left 2   | 0 | 0 |
| hugin-PC left 3   | 0 | 0 |
| hugin-PC left 4   | 2 | 0 |
| hugin-RG right 1  | 0 | 0 |
| hugin-RG right 2  | 0 | 0 |
| hugin-RG left 1   | 0 | 0 |
| hugin-RG left 2   | 0 | 0 |
| hugin-VNC right 1 | 0 | 0 |
| hugin-VNC right 2 | 0 | 0 |
| hugin-VNC left 1  | 0 | 0 |
| hugin-VNC left 2  | 0 | 0 |
| hugin-PH right 1  | 0 | 0 |
| hugin-PH right 2  | 0 | 0 |
| hugin-PH left 1   | 0 | 0 |
| hugin-PH left 2   | 0 | 0 |



25.

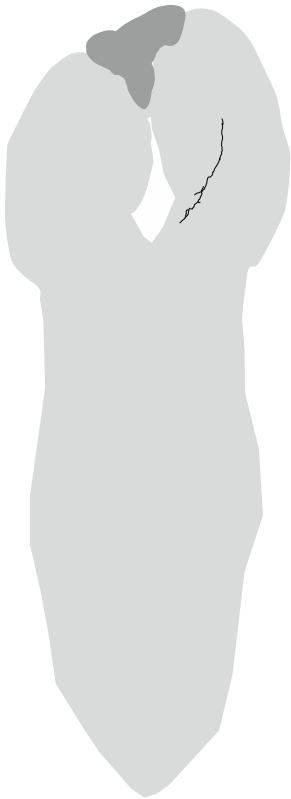

#9748269

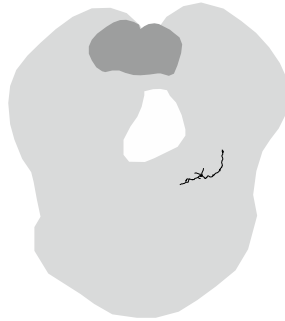

synapses to

synapses from

|                   |   |   |
|-------------------|---|---|
| hugin-PC right 1  | 0 | 0 |
| hugin-PC right 2  | 0 | 0 |
| hugin-PC right 3  | 0 | 0 |
| hugin-PC right 4  | 2 | 0 |
| hugin-PC left 1   | 0 | 0 |
| hugin-PC left 2   | 0 | 0 |
| hugin-PC left 3   | 0 | 0 |
| hugin-PC left 4   | 0 | 0 |
| hugin-RG right 1  | 0 | 0 |
| hugin-RG right 2  | 0 | 0 |
| hugin-RG left 1   | 0 | 0 |
| hugin-RG left 2   | 0 | 0 |
| hugin-VNC right 1 | 0 | 0 |
| hugin-VNC right 2 | 0 | 0 |
| hugin-VNC left 1  | 0 | 0 |
| hugin-VNC left 2  | 0 | 0 |
| hugin-PH right 1  | 0 | 0 |
| hugin-PH right 2  | 0 | 0 |
| hugin-PH left 1   | 0 | 0 |
| hugin-PH left 2   | 0 | 0 |

26.

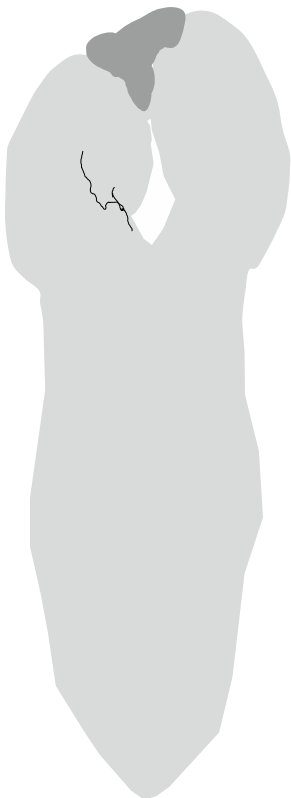

#15770032

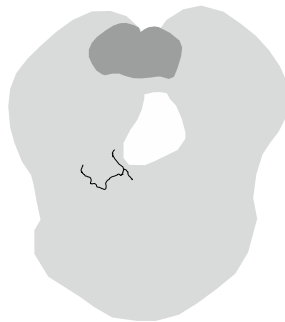

synapses to

synapses from

|                   |   |   |
|-------------------|---|---|
| hugin-PC right 1  | 0 | 0 |
| hugin-PC right 2  | 0 | 0 |
| hugin-PC right 3  | 0 | 0 |
| hugin-PC right 4  | 0 | 0 |
| hugin-PC left 1   | 0 | 0 |
| hugin-PC left 2   | 0 | 0 |
| hugin-PC left 3   | 0 | 0 |
| hugin-PC left 4   | 0 | 0 |
| hugin-RG right 1  | 0 | 0 |
| hugin-RG right 2  | 0 | 0 |
| hugin-RG left 1   | 0 | 0 |
| hugin-RG left 2   | 0 | 0 |
| hugin-VNC right 1 | 0 | 0 |
| hugin-VNC right 2 | 2 | 0 |
| hugin-VNC left 1  | 0 | 0 |
| hugin-VNC left 2  | 0 | 0 |
| hugin-PH right 1  | 0 | 0 |
| hugin-PH right 2  | 0 | 0 |
| hugin-PH left 1   | 0 | 0 |
| hugin-PH left 2   | 0 | 0 |

27.

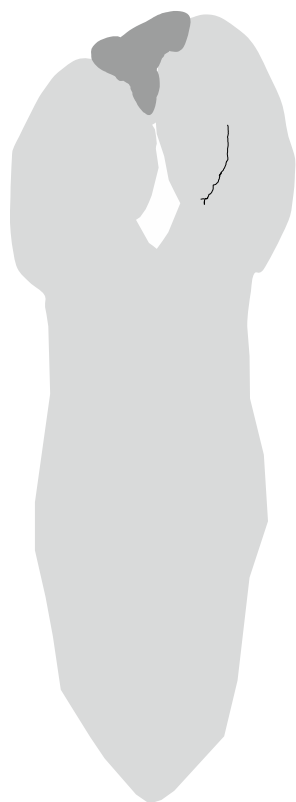

#16442344

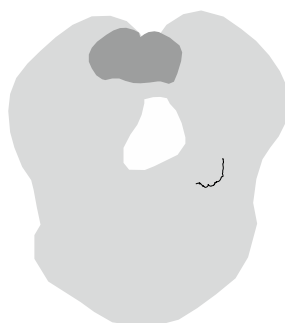

synapses to

synapses from

|                   |   |   |
|-------------------|---|---|
| hugin-PC right 1  | 0 | 0 |
| hugin-PC right 2  | 2 | 0 |
| hugin-PC right 3  | 0 | 0 |
| hugin-PC right 4  | 0 | 0 |
| hugin-PC left 1   | 0 | 0 |
| hugin-PC left 2   | 0 | 0 |
| hugin-PC left 3   | 0 | 0 |
| hugin-PC left 4   | 0 | 0 |
| hugin-RG right 1  | 0 | 0 |
| hugin-RG right 2  | 0 | 0 |
| hugin-RG left 1   | 0 | 0 |
| hugin-RG left 2   | 0 | 0 |
| hugin-VNC right 1 | 0 | 0 |
| hugin-VNC right 2 | 0 | 0 |
| hugin-VNC left 1  | 0 | 0 |
| hugin-VNC left 2  | 0 | 0 |
| hugin-PH right 1  | 0 | 0 |
| hugin-PH right 2  | 0 | 0 |
| hugin-PH left 1   | 0 | 0 |
| hugin-PH left 2   | 0 | 0 |

28.

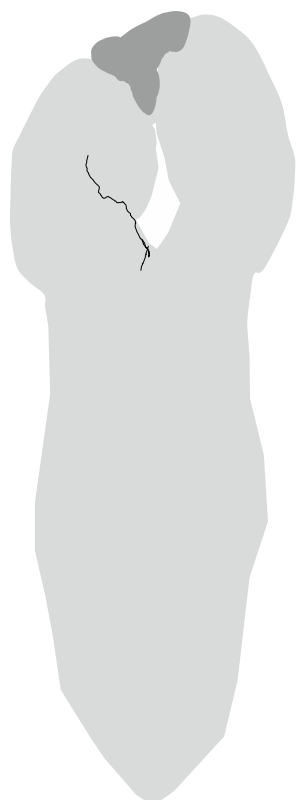

#40152

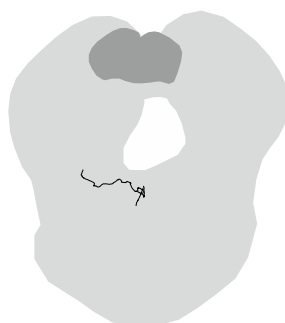

synapses to

synapses from

|                   |   |   |
|-------------------|---|---|
| hugin-PC right 1  | 0 | 0 |
| hugin-PC right 2  | 0 | 0 |
| hugin-PC right 3  | 0 | 0 |
| hugin-PC right 4  | 0 | 0 |
| hugin-PC left 1   | 2 | 0 |
| hugin-PC left 2   | 2 | 0 |
| hugin-PC left 3   | 2 | 0 |
| hugin-PC left 4   | 0 | 0 |
| hugin-RG right 1  | 0 | 0 |
| hugin-RG right 2  | 0 | 0 |
| hugin-RG left 1   | 0 | 0 |
| hugin-RG left 2   | 0 | 0 |
| hugin-VNC right 1 | 0 | 0 |
| hugin-VNC right 2 | 1 | 0 |
| hugin-VNC left 1  | 1 | 0 |
| hugin-VNC left 2  | 0 | 0 |
| hugin-PH right 1  | 0 | 0 |
| hugin-PH right 2  | 0 | 0 |
| hugin-PH left 1   | 0 | 0 |
| hugin-PH left 2   | 0 | 0 |

29.

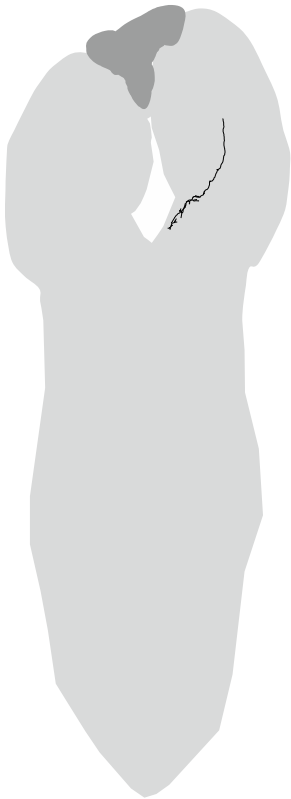

#6883831

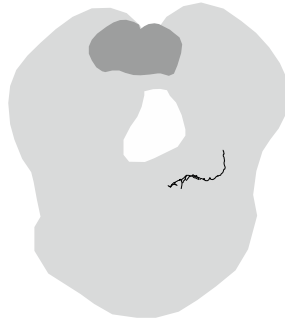

synapses to

synapses from

|                   |   |   |
|-------------------|---|---|
| hugin-PC right 1  | 2 | 2 |
| hugin-PC right 2  | 0 | 0 |
| hugin-PC right 3  | 0 | 0 |
| hugin-PC right 4  | 0 | 0 |
| hugin-PC left 1   | 0 | 0 |
| hugin-PC left 2   | 0 | 0 |
| hugin-PC left 3   | 0 | 0 |
| hugin-PC left 4   | 0 | 0 |
| hugin-RG right 1  | 0 | 0 |
| hugin-RG right 2  | 0 | 0 |
| hugin-RG left 1   | 0 | 0 |
| hugin-RG left 2   | 0 | 0 |
| hugin-VNC right 1 | 0 | 0 |
| hugin-VNC right 2 | 0 | 0 |
| hugin-VNC left 1  | 0 | 0 |
| hugin-VNC left 2  | 0 | 0 |
| hugin-PH right 1  | 0 | 0 |
| hugin-PH right 2  | 0 | 0 |
| hugin-PH left 1   | 0 | 0 |
| hugin-PH left 2   | 0 | 0 |

30.

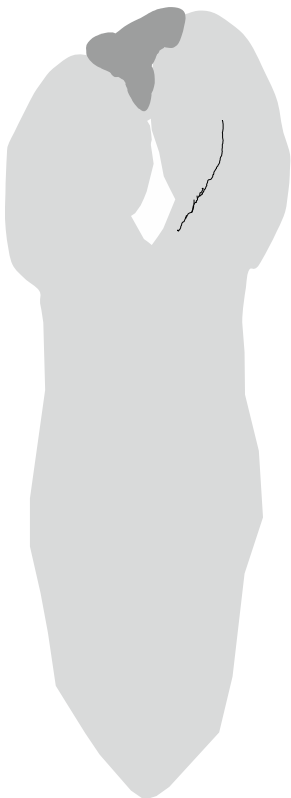

#9716858

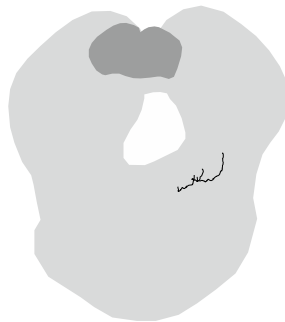

synapses to

synapses from

|                   |   |   |
|-------------------|---|---|
| hugin-PC right 1  | 0 | 0 |
| hugin-PC right 2  | 3 | 0 |
| hugin-PC right 3  | 0 | 0 |
| hugin-PC right 4  | 0 | 0 |
| hugin-PC left 1   | 0 | 0 |
| hugin-PC left 2   | 0 | 0 |
| hugin-PC left 3   | 0 | 0 |
| hugin-PC left 4   | 0 | 0 |
| hugin-RG right 1  | 0 | 0 |
| hugin-RG right 2  | 0 | 0 |
| hugin-RG left 1   | 0 | 0 |
| hugin-RG left 2   | 0 | 0 |
| hugin-VNC right 1 | 0 | 0 |
| hugin-VNC right 2 | 0 | 0 |
| hugin-VNC left 1  | 0 | 0 |
| hugin-VNC left 2  | 0 | 0 |
| hugin-PH right 1  | 0 | 0 |
| hugin-PH right 2  | 0 | 0 |
| hugin-PH left 1   | 0 | 0 |
| hugin-PH left 2   | 0 | 0 |

31.

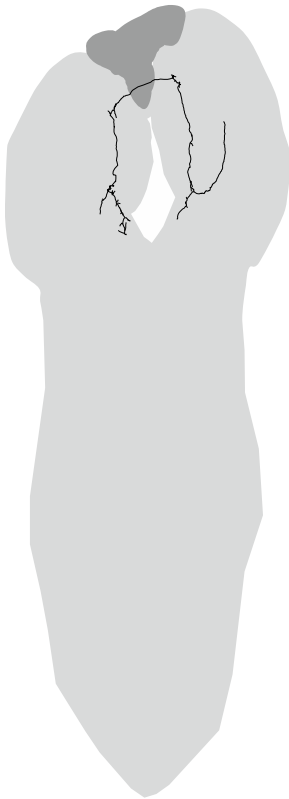

#2456826

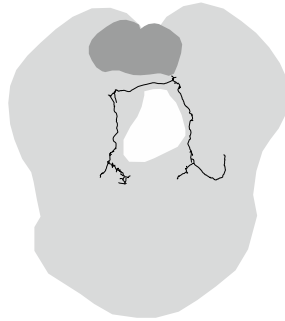

synapses to

synapses from

|                   |   |   |
|-------------------|---|---|
| hugin-PC right 1  | 1 | 0 |
| hugin-PC right 2  | 1 | 0 |
| hugin-PC right 3  | 4 | 0 |
| hugin-PC right 4  | 1 | 0 |
| hugin-PC left 1   | 0 | 0 |
| hugin-PC left 2   | 1 | 0 |
| hugin-PC left 3   | 0 | 1 |
| hugin-PC left 4   | 2 | 0 |
| hugin-RG right 1  | 0 | 0 |
| hugin-RG right 2  | 0 | 0 |
| hugin-RG left 1   | 0 | 0 |
| hugin-RG left 2   | 0 | 0 |
| hugin-VNC right 1 | 0 | 0 |
| hugin-VNC right 2 | 0 | 0 |
| hugin-VNC left 1  | 0 | 0 |
| hugin-VNC left 2  | 0 | 0 |
| hugin-PH right 1  | 0 | 0 |
| hugin-PH right 2  | 0 | 0 |
| hugin-PH left 1   | 0 | 0 |
| hugin-PH left 2   | 0 | 0 |

32.

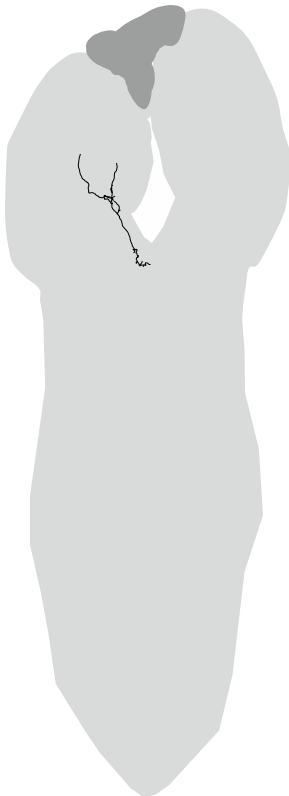

#15997666

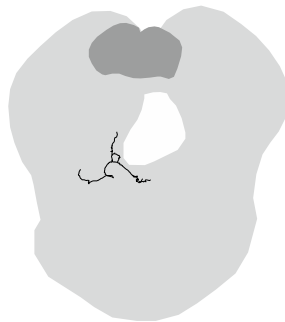

synapses to

synapses from

|                   |   |   |
|-------------------|---|---|
| hugin-PC right 1  | 0 | 0 |
| hugin-PC right 2  | 0 | 0 |
| hugin-PC right 3  | 0 | 0 |
| hugin-PC right 4  | 0 | 0 |
| hugin-PC left 1   | 0 | 0 |
| hugin-PC left 2   | 0 | 0 |
| hugin-PC left 3   | 1 | 0 |
| hugin-PC left 4   | 0 | 0 |
| hugin-RG right 1  | 1 | 0 |
| hugin-RG right 2  | 0 | 0 |
| hugin-RG left 1   | 2 | 0 |
| hugin-RG left 2   | 0 | 0 |
| hugin-VNC right 1 | 0 | 0 |
| hugin-VNC right 2 | 0 | 0 |
| hugin-VNC left 1  | 0 | 0 |
| hugin-VNC left 2  | 0 | 0 |
| hugin-PH right 1  | 0 | 0 |
| hugin-PH right 2  | 0 | 0 |
| hugin-PH left 1   | 0 | 0 |
| hugin-PH left 2   | 0 | 0 |

33.

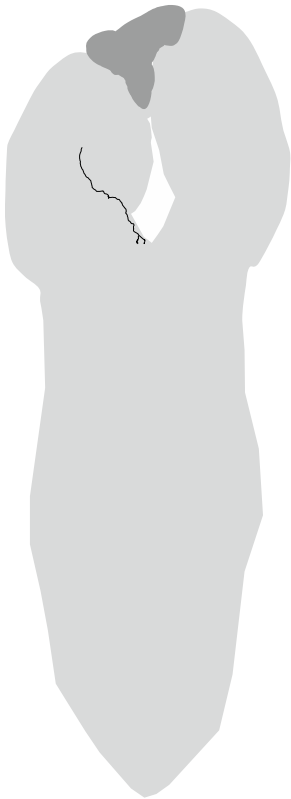

#9838294

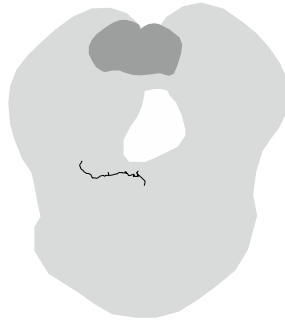

synapses to

synapses from

|                   |   |   |
|-------------------|---|---|
| hugin-PC right 1  | 0 | 0 |
| hugin-PC right 2  | 0 | 0 |
| hugin-PC right 3  | 0 | 0 |
| hugin-PC right 4  | 0 | 0 |
| hugin-PC left 1   | 0 | 0 |
| hugin-PC left 2   | 0 | 0 |
| hugin-PC left 3   | 0 | 0 |
| hugin-PC left 4   | 0 | 1 |
| hugin-RG right 1  | 0 | 0 |
| hugin-RG right 2  | 0 | 0 |
| hugin-RG left 1   | 0 | 0 |
| hugin-RG left 2   | 0 | 0 |
| hugin-VNC right 1 | 2 | 0 |
| hugin-VNC right 2 | 0 | 0 |
| hugin-VNC left 1  | 1 | 0 |
| hugin-VNC left 2  | 0 | 0 |
| hugin-PH right 1  | 0 | 0 |
| hugin-PH right 2  | 0 | 0 |
| hugin-PH left 1   | 0 | 0 |
| hugin-PH left 2   | 0 | 0 |

34.

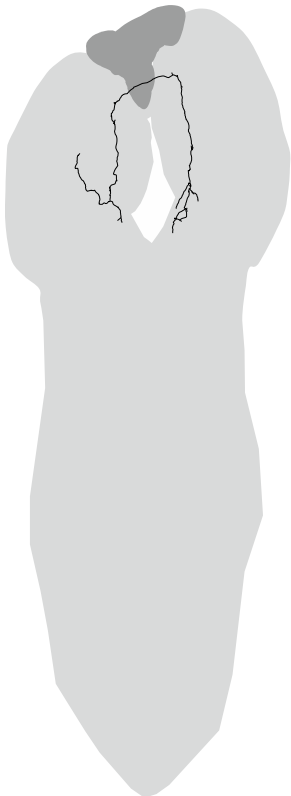

#13744425

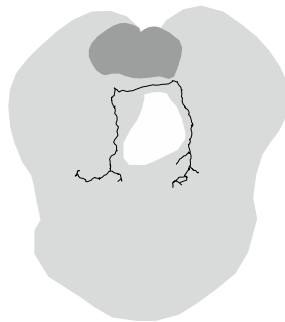

synapses to

synapses from

|                   |   |   |
|-------------------|---|---|
| hugin-PC right 1  | 0 | 2 |
| hugin-PC right 2  | 1 | 1 |
| hugin-PC right 3  | 0 | 0 |
| hugin-PC right 4  | 0 | 0 |
| hugin-PC left 1   | 2 | 0 |
| hugin-PC left 2   | 0 | 0 |
| hugin-PC left 3   | 2 | 0 |
| hugin-PC left 4   | 1 | 0 |
| hugin-RG right 1  | 0 | 0 |
| hugin-RG right 2  | 0 | 0 |
| hugin-RG left 1   | 0 | 0 |
| hugin-RG left 2   | 0 | 0 |
| hugin-VNC right 1 | 0 | 0 |
| hugin-VNC right 2 | 0 | 0 |
| hugin-VNC left 1  | 0 | 0 |
| hugin-VNC left 2  | 0 | 0 |
| hugin-PH right 1  | 0 | 0 |
| hugin-PH right 2  | 0 | 0 |
| hugin-PH left 1   | 0 | 0 |
| hugin-PH left 2   | 0 | 0 |

35.

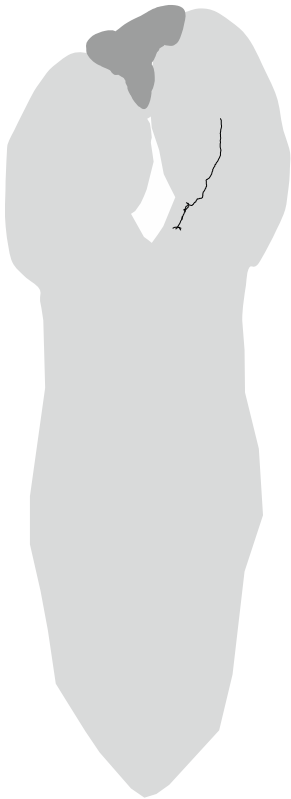

#15543068

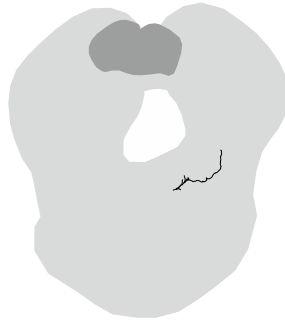

synapses to

synapses from

|                   |   |   |
|-------------------|---|---|
| hugin-PC right 1  | 1 | 0 |
| hugin-PC right 2  | 0 | 0 |
| hugin-PC right 3  | 2 | 0 |
| hugin-PC right 4  | 1 | 0 |
| hugin-PC left 1   | 0 | 0 |
| hugin-PC left 2   | 0 | 0 |
| hugin-PC left 3   | 0 | 0 |
| hugin-PC left 4   | 0 | 0 |
| hugin-RG right 1  | 0 | 0 |
| hugin-RG right 2  | 0 | 0 |
| hugin-RG left 1   | 0 | 0 |
| hugin-RG left 2   | 0 | 0 |
| hugin-VNC right 1 | 0 | 0 |
| hugin-VNC right 2 | 0 | 0 |
| hugin-VNC left 1  | 0 | 0 |
| hugin-VNC left 2  | 0 | 0 |
| hugin-PH right 1  | 0 | 0 |
| hugin-PH right 2  | 0 | 0 |
| hugin-PH left 1   | 0 | 0 |
| hugin-PH left 2   | 0 | 0 |

36.

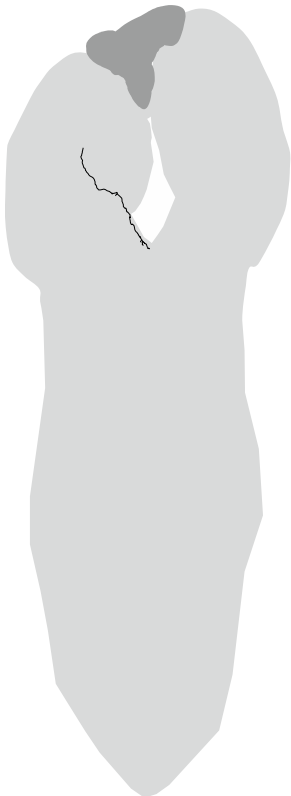

#1395971

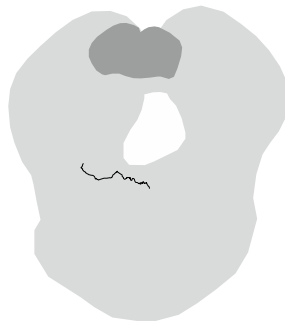

synapses to

synapses from

|                   |   |   |
|-------------------|---|---|
| hugin-PC right 1  | 0 | 0 |
| hugin-PC right 2  | 0 | 0 |
| hugin-PC right 3  | 0 | 0 |
| hugin-PC right 4  | 0 | 0 |
| hugin-PC left 1   | 0 | 0 |
| hugin-PC left 2   | 1 | 0 |
| hugin-PC left 3   | 2 | 0 |
| hugin-PC left 4   | 0 | 0 |
| hugin-RG right 1  | 0 | 0 |
| hugin-RG right 2  | 0 | 0 |
| hugin-RG left 1   | 0 | 0 |
| hugin-RG left 2   | 0 | 0 |
| hugin-VNC right 1 | 2 | 0 |
| hugin-VNC right 2 | 6 | 0 |
| hugin-VNC left 1  | 2 | 0 |
| hugin-VNC left 2  | 0 | 0 |
| hugin-PH right 1  | 0 | 0 |
| hugin-PH right 2  | 0 | 0 |
| hugin-PH left 1   | 0 | 0 |
| hugin-PH left 2   | 0 | 0 |

37.

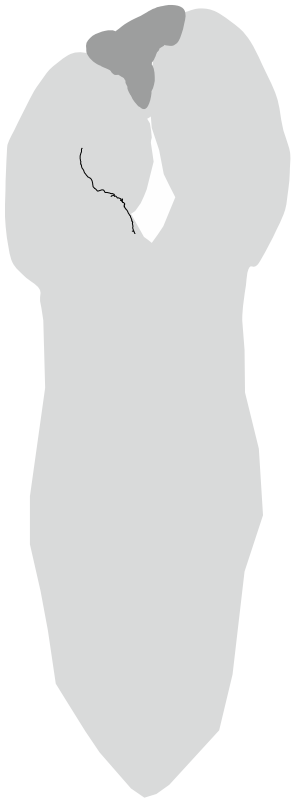

#1377586

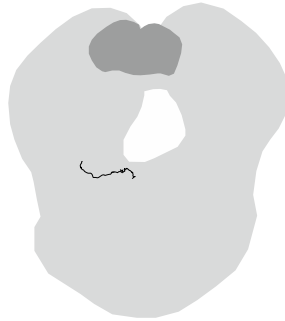

synapses to

synapses from

|                   |   |   |
|-------------------|---|---|
| hugin-PC right 1  | 0 | 0 |
| hugin-PC right 2  | 0 | 0 |
| hugin-PC right 3  | 0 | 0 |
| hugin-PC right 4  | 0 | 0 |
| hugin-PC left 1   | 0 | 0 |
| hugin-PC left 2   | 0 | 0 |
| hugin-PC left 3   | 0 | 0 |
| hugin-PC left 4   | 0 | 0 |
| hugin-RG right 1  | 0 | 0 |
| hugin-RG right 2  | 0 | 0 |
| hugin-RG left 1   | 0 | 0 |
| hugin-RG left 2   | 0 | 0 |
| hugin-VNC right 1 | 1 | 0 |
| hugin-VNC right 2 | 2 | 0 |
| hugin-VNC left 1  | 0 | 0 |
| hugin-VNC left 2  | 0 | 0 |
| hugin-PH right 1  | 0 | 0 |
| hugin-PH right 2  | 0 | 0 |
| hugin-PH left 1   | 0 | 0 |
| hugin-PH left 2   | 0 | 0 |

38.

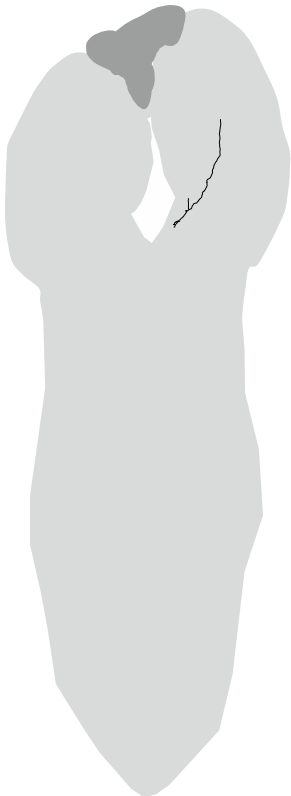

#15572414

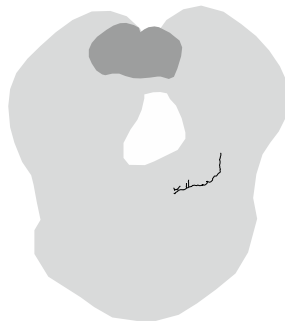

synapses to

synapses from

|                   |   |   |
|-------------------|---|---|
| hugin-PC right 1  | 1 | 0 |
| hugin-PC right 2  | 1 | 0 |
| hugin-PC right 3  | 0 | 0 |
| hugin-PC right 4  | 0 | 0 |
| hugin-PC left 1   | 0 | 0 |
| hugin-PC left 2   | 0 | 0 |
| hugin-PC left 3   | 0 | 0 |
| hugin-PC left 4   | 0 | 0 |
| hugin-RG right 1  | 0 | 0 |
| hugin-RG right 2  | 0 | 0 |
| hugin-RG left 1   | 0 | 0 |
| hugin-RG left 2   | 0 | 0 |
| hugin-VNC right 1 | 0 | 0 |
| hugin-VNC right 2 | 0 | 0 |
| hugin-VNC left 1  | 0 | 0 |
| hugin-VNC left 2  | 0 | 0 |
| hugin-PH right 1  | 0 | 0 |
| hugin-PH right 2  | 0 | 0 |
| hugin-PH left 1   | 0 | 0 |
| hugin-PH left 2   | 0 | 0 |

39.

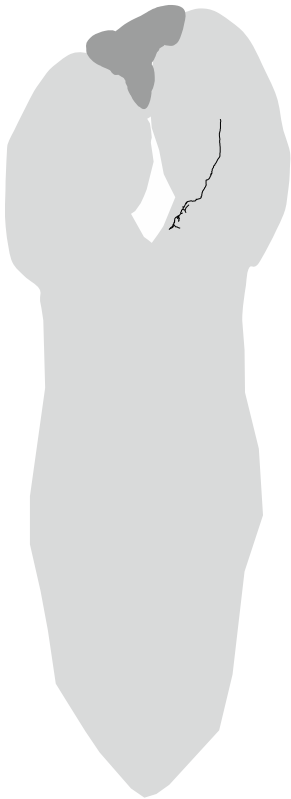

#15575327

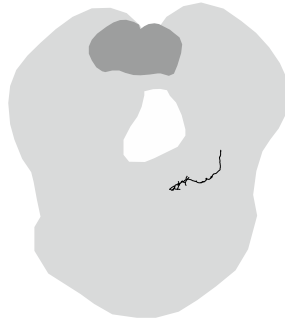

synapses to

synapses from

|                   |   |   |
|-------------------|---|---|
| hugin-PC right 1  | 3 | 0 |
| hugin-PC right 2  | 2 | 0 |
| hugin-PC right 3  | 1 | 0 |
| hugin-PC right 4  | 0 | 0 |
| hugin-PC left 1   | 0 | 0 |
| hugin-PC left 2   | 0 | 0 |
| hugin-PC left 3   | 0 | 0 |
| hugin-PC left 4   | 0 | 0 |
| hugin-RG right 1  | 0 | 0 |
| hugin-RG right 2  | 0 | 0 |
| hugin-RG left 1   | 0 | 0 |
| hugin-RG left 2   | 0 | 0 |
| hugin-VNC right 1 | 0 | 0 |
| hugin-VNC right 2 | 0 | 0 |
| hugin-VNC left 1  | 0 | 0 |
| hugin-VNC left 2  | 0 | 0 |
| hugin-PH right 1  | 0 | 0 |
| hugin-PH right 2  | 0 | 0 |
| hugin-PH left 1   | 0 | 0 |
| hugin-PH left 2   | 0 | 0 |

40.

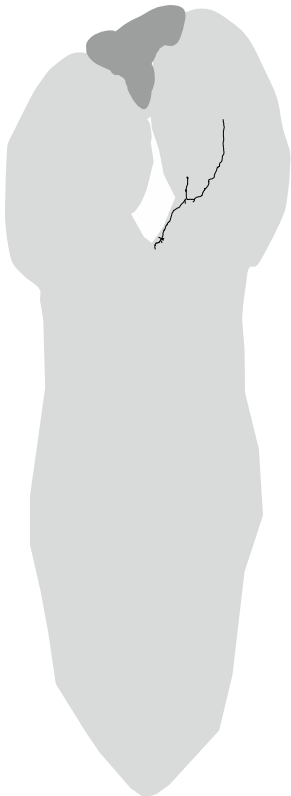

#15574231

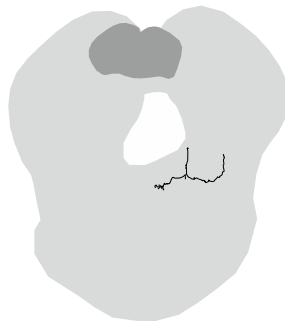

synapses to

synapses from

|                   |   |   |
|-------------------|---|---|
| hugin-PC right 1  | 1 | 1 |
| hugin-PC right 2  | 5 | 0 |
| hugin-PC right 3  | 0 | 0 |
| hugin-PC right 4  | 2 | 0 |
| hugin-PC left 1   | 0 | 0 |
| hugin-PC left 2   | 0 | 0 |
| hugin-PC left 3   | 0 | 0 |
| hugin-PC left 4   | 0 | 0 |
| hugin-RG right 1  | 0 | 0 |
| hugin-RG right 2  | 0 | 0 |
| hugin-RG left 1   | 0 | 0 |
| hugin-RG left 2   | 0 | 0 |
| hugin-VNC right 1 | 0 | 0 |
| hugin-VNC right 2 | 0 | 0 |
| hugin-VNC left 1  | 0 | 0 |
| hugin-VNC left 2  | 0 | 0 |
| hugin-PH right 1  | 0 | 0 |
| hugin-PH right 2  | 0 | 0 |
| hugin-PH left 1   | 0 | 0 |
| hugin-PH left 2   | 0 | 0 |



41.

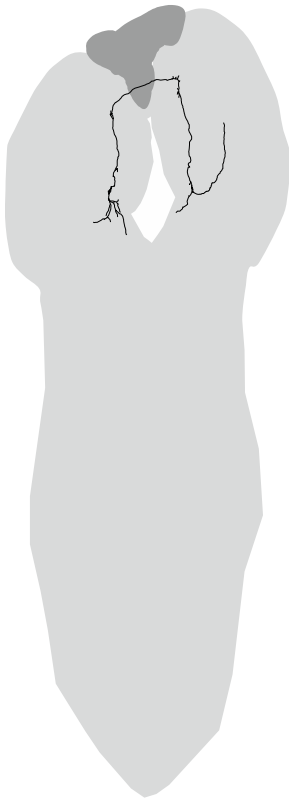

#2340336

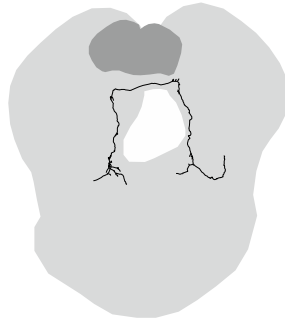

synapses to

synapses from

|                   |   |   |
|-------------------|---|---|
| hugin-PC right 1  | 1 | 1 |
| hugin-PC right 2  | 1 | 0 |
| hugin-PC right 3  | 1 | 0 |
| hugin-PC right 4  | 1 | 0 |
| hugin-PC left 1   | 0 | 0 |
| hugin-PC left 2   | 1 | 0 |
| hugin-PC left 3   | 1 | 0 |
| hugin-PC left 4   | 0 | 0 |
| hugin-RG right 1  | 0 | 0 |
| hugin-RG right 2  | 0 | 0 |
| hugin-RG left 1   | 0 | 0 |
| hugin-RG left 2   | 0 | 0 |
| hugin-VNC right 1 | 0 | 0 |
| hugin-VNC right 2 | 0 | 0 |
| hugin-VNC left 1  | 0 | 0 |
| hugin-VNC left 2  | 0 | 0 |
| hugin-PH right 1  | 0 | 0 |
| hugin-PH right 2  | 0 | 0 |
| hugin-PH left 1   | 0 | 0 |
| hugin-PH left 2   | 0 | 0 |

42.

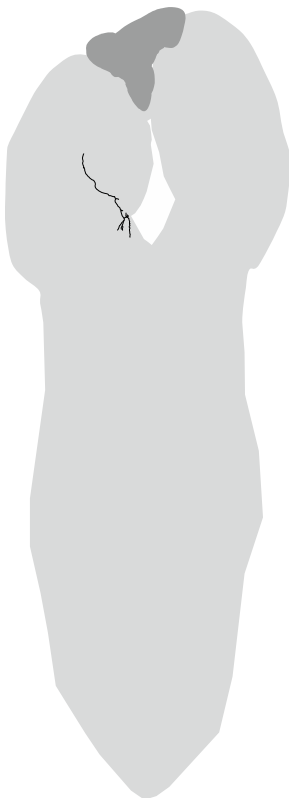

#15770904

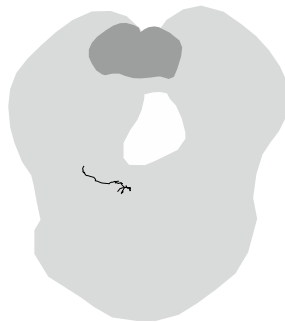

synapses to

synapses from

|                   |   |   |
|-------------------|---|---|
| hugin-PC right 1  | 0 | 0 |
| hugin-PC right 2  | 0 | 0 |
| hugin-PC right 3  | 0 | 0 |
| hugin-PC right 4  | 0 | 0 |
| hugin-PC left 1   | 1 | 0 |
| hugin-PC left 2   | 0 | 0 |
| hugin-PC left 3   | 2 | 0 |
| hugin-PC left 4   | 1 | 0 |
| hugin-RG right 1  | 0 | 0 |
| hugin-RG right 2  | 0 | 0 |
| hugin-RG left 1   | 0 | 0 |
| hugin-RG left 2   | 0 | 0 |
| hugin-VNC right 1 | 0 | 0 |
| hugin-VNC right 2 | 0 | 0 |
| hugin-VNC left 1  | 0 | 0 |
| hugin-VNC left 2  | 0 | 0 |
| hugin-PH right 1  | 0 | 0 |
| hugin-PH right 2  | 0 | 0 |
| hugin-PH left 1   | 0 | 0 |
| hugin-PH left 2   | 0 | 0 |

43.

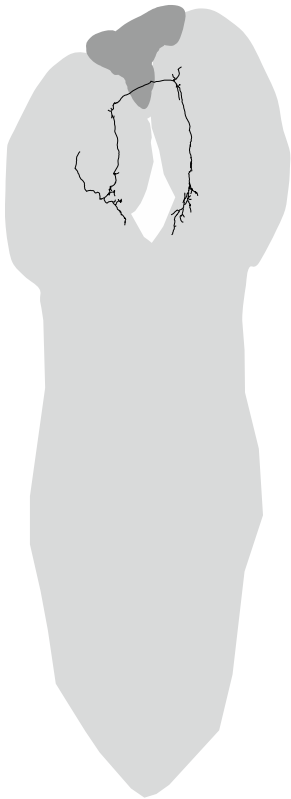

#2284021

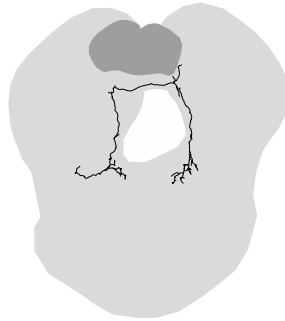

synapses to

synapses from

|                   |   |   |
|-------------------|---|---|
| hugin-PC right 1  | 1 | 1 |
| hugin-PC right 2  | 0 | 1 |
| hugin-PC right 3  | 1 | 0 |
| hugin-PC right 4  | 2 | 0 |
| hugin-PC left 1   | 1 | 0 |
| hugin-PC left 2   | 0 | 0 |
| hugin-PC left 3   | 1 | 1 |
| hugin-PC left 4   | 7 | 0 |
| hugin-RG right 1  | 0 | 0 |
| hugin-RG right 2  | 0 | 0 |
| hugin-RG left 1   | 0 | 0 |
| hugin-RG left 2   | 0 | 0 |
| hugin-VNC right 1 | 0 | 0 |
| hugin-VNC right 2 | 0 | 0 |
| hugin-VNC left 1  | 0 | 0 |
| hugin-VNC left 2  | 0 | 0 |
| hugin-PH right 1  | 0 | 0 |
| hugin-PH right 2  | 0 | 0 |
| hugin-PH left 1   | 0 | 0 |
| hugin-PH left 2   | 0 | 0 |

44.

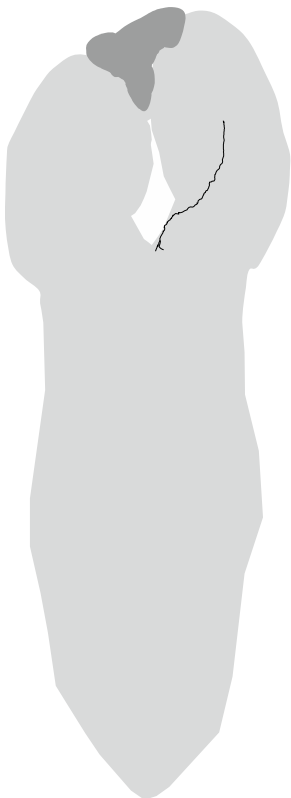

#15573450

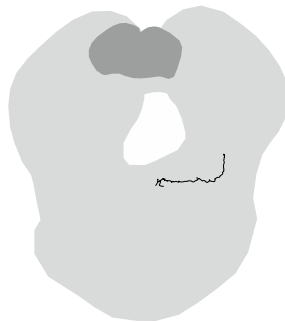

synapses to

synapses from

|                   |   |   |
|-------------------|---|---|
| hugin-PC right 1  | 0 | 0 |
| hugin-PC right 2  | 0 | 0 |
| hugin-PC right 3  | 0 | 0 |
| hugin-PC right 4  | 0 | 0 |
| hugin-PC left 1   | 0 | 0 |
| hugin-PC left 2   | 0 | 0 |
| hugin-PC left 3   | 0 | 0 |
| hugin-PC left 4   | 0 | 0 |
| hugin-RG right 1  | 0 | 0 |
| hugin-RG right 2  | 0 | 0 |
| hugin-RG left 1   | 0 | 0 |
| hugin-RG left 2   | 0 | 0 |
| hugin-VNC right 1 | 0 | 0 |
| hugin-VNC right 2 | 0 | 0 |
| hugin-VNC left 1  | 0 | 0 |
| hugin-VNC left 2  | 2 | 0 |
| hugin-PH right 1  | 0 | 0 |
| hugin-PH right 2  | 0 | 0 |
| hugin-PH left 1   | 0 | 0 |
| hugin-PH left 2   | 0 | 0 |

# I Abdominal sensory neurons

1.

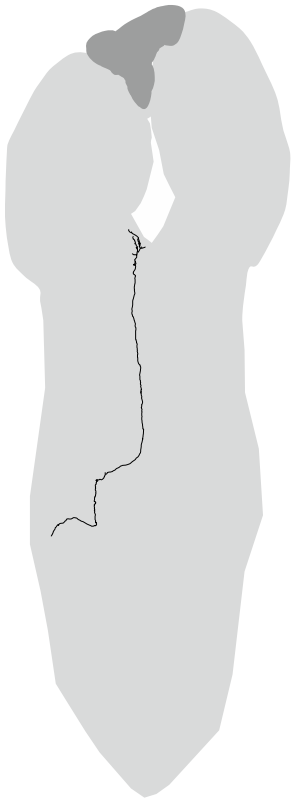

#4363883

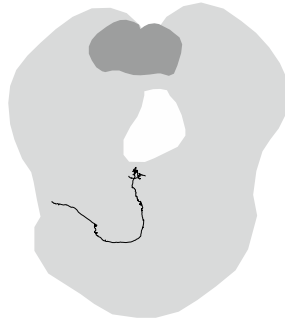

synapses to

synapses from

|                   |   |   |
|-------------------|---|---|
| hugin-PC right 1  | 0 | 0 |
| hugin-PC right 2  | 0 | 0 |
| hugin-PC right 3  | 0 | 0 |
| hugin-PC right 4  | 0 | 0 |
| hugin-PC left 1   | 0 | 0 |
| hugin-PC left 2   | 0 | 0 |
| hugin-PC left 3   | 0 | 0 |
| hugin-PC left 4   | 0 | 0 |
| hugin-RG right 1  | 0 | 0 |
| hugin-RG right 2  | 0 | 0 |
| hugin-RG left 1   | 0 | 0 |
| hugin-RG left 2   | 0 | 0 |
| hugin-VNC right 1 | 3 | 0 |
| hugin-VNC right 2 | 2 | 0 |
| hugin-VNC left 1  | 4 | 0 |
| hugin-VNC left 2  | 0 | 0 |
| hugin-PH right 1  | 0 | 0 |
| hugin-PH right 2  | 0 | 0 |
| hugin-PH left 1   | 0 | 0 |
| hugin-PH left 2   | 0 | 0 |

2.

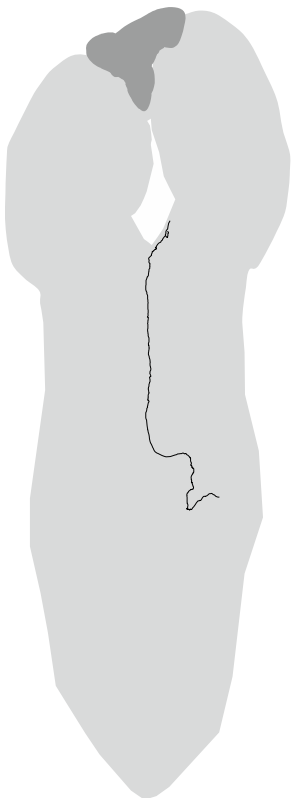

#5382876

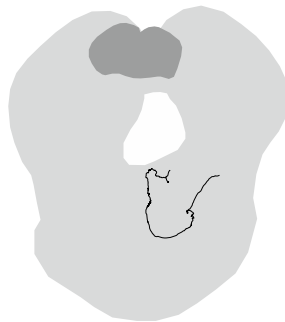

synapses to

synapses from

|                   |   |   |
|-------------------|---|---|
| hugin-PC right 1  | 0 | 0 |
| hugin-PC right 2  | 0 | 0 |
| hugin-PC right 3  | 0 | 0 |
| hugin-PC right 4  | 0 | 0 |
| hugin-PC left 1   | 0 | 0 |
| hugin-PC left 2   | 0 | 0 |
| hugin-PC left 3   | 0 | 0 |
| hugin-PC left 4   | 0 | 0 |
| hugin-RG right 1  | 0 | 0 |
| hugin-RG right 2  | 0 | 0 |
| hugin-RG left 1   | 0 | 0 |
| hugin-RG left 2   | 0 | 0 |
| hugin-VNC right 1 | 2 | 0 |
| hugin-VNC right 2 | 0 | 0 |
| hugin-VNC left 1  | 2 | 0 |
| hugin-VNC left 2  | 3 | 0 |
| hugin-PH right 1  | 0 | 0 |
| hugin-PH right 2  | 0 | 0 |
| hugin-PH left 1   | 0 | 0 |
| hugin-PH left 2   | 0 | 0 |

3.

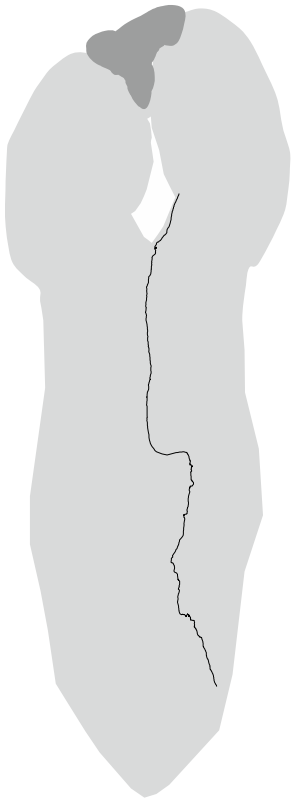

#7331555

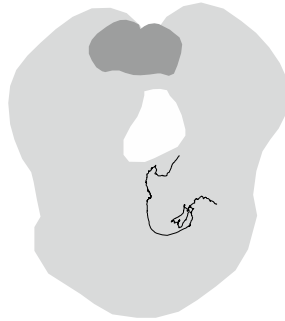

synapses to

synapses from

|                   |   |   |
|-------------------|---|---|
| hugin-PC right 1  | 0 | 0 |
| hugin-PC right 2  | 0 | 0 |
| hugin-PC right 3  | 0 | 0 |
| hugin-PC right 4  | 0 | 0 |
| hugin-PC left 1   | 0 | 0 |
| hugin-PC left 2   | 0 | 0 |
| hugin-PC left 3   | 0 | 0 |
| hugin-PC left 4   | 0 | 0 |
| hugin-RG right 1  | 0 | 0 |
| hugin-RG right 2  | 0 | 0 |
| hugin-RG left 1   | 0 | 0 |
| hugin-RG left 2   | 0 | 0 |
| hugin-VNC right 1 | 4 | 0 |
| hugin-VNC right 2 | 0 | 0 |
| hugin-VNC left 1  | 0 | 0 |
| hugin-VNC left 2  | 4 | 0 |
| hugin-PH right 1  | 0 | 0 |
| hugin-PH right 2  | 0 | 0 |
| hugin-PH left 1   | 0 | 0 |
| hugin-PH left 2   | 0 | 0 |

4.

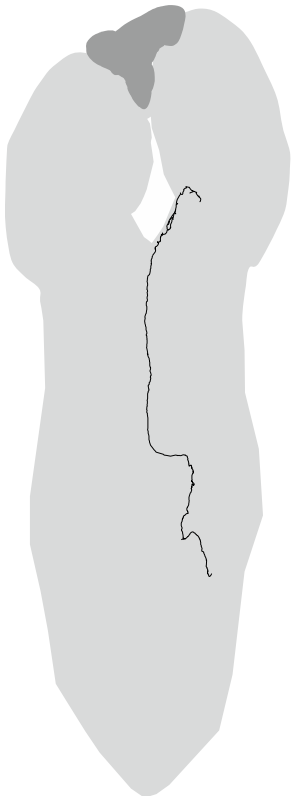

#9503203

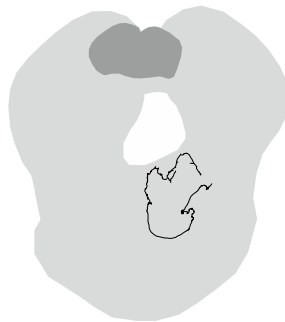

synapses to

synapses from

|                   |   |   |
|-------------------|---|---|
| hugin-PC right 1  | 0 | 0 |
| hugin-PC right 2  | 1 | 0 |
| hugin-PC right 3  | 0 | 0 |
| hugin-PC right 4  | 0 | 0 |
| hugin-PC left 1   | 0 | 0 |
| hugin-PC left 2   | 0 | 0 |
| hugin-PC left 3   | 0 | 0 |
| hugin-PC left 4   | 0 | 0 |
| hugin-RG right 1  | 0 | 0 |
| hugin-RG right 2  | 0 | 0 |
| hugin-RG left 1   | 0 | 0 |
| hugin-RG left 2   | 0 | 0 |
| hugin-VNC right 1 | 1 | 0 |
| hugin-VNC right 2 | 0 | 0 |
| hugin-VNC left 1  | 2 | 0 |
| hugin-VNC left 2  | 0 | 0 |
| hugin-PH right 1  | 0 | 0 |
| hugin-PH right 2  | 0 | 0 |
| hugin-PH left 1   | 0 | 0 |
| hugin-PH left 2   | 0 | 0 |

5.

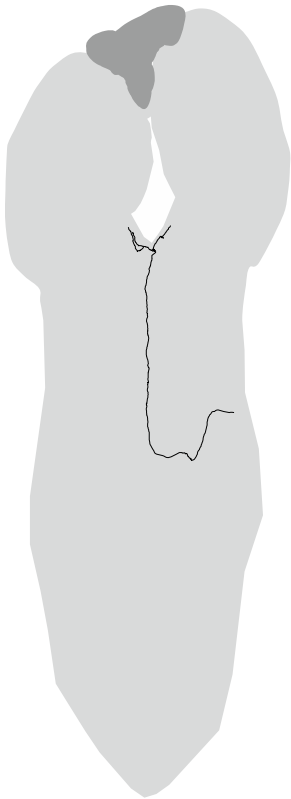

#10868477

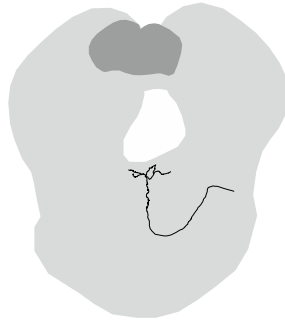

synapses to

synapses from

|                   |   |   |
|-------------------|---|---|
| hugin-PC right 1  | 0 | 0 |
| hugin-PC right 2  | 0 | 0 |
| hugin-PC right 3  | 0 | 0 |
| hugin-PC right 4  | 0 | 0 |
| hugin-PC left 1   | 0 | 0 |
| hugin-PC left 2   | 0 | 0 |
| hugin-PC left 3   | 0 | 0 |
| hugin-PC left 4   | 0 | 0 |
| hugin-RG right 1  | 0 | 0 |
| hugin-RG right 2  | 0 | 0 |
| hugin-RG left 1   | 0 | 0 |
| hugin-RG left 2   | 0 | 0 |
| hugin-VNC right 1 | 2 | 0 |
| hugin-VNC right 2 | 0 | 0 |
| hugin-VNC left 1  | 1 | 0 |
| hugin-VNC left 2  | 1 | 0 |
| hugin-PH right 1  | 0 | 0 |
| hugin-PH right 2  | 0 | 0 |
| hugin-PH left 1   | 0 | 0 |
| hugin-PH left 2   | 0 | 0 |

6.

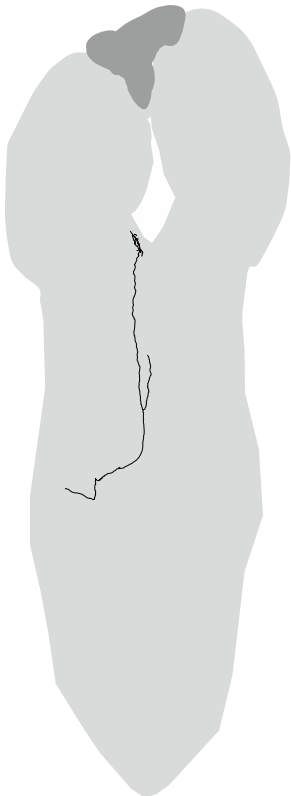

#8005609

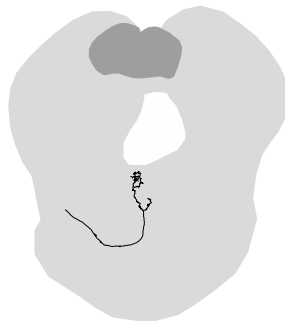

synapses to

synapses from

|                   |   |   |
|-------------------|---|---|
| hugin-PC right 1  | 0 | 0 |
| hugin-PC right 2  | 0 | 0 |
| hugin-PC right 3  | 0 | 0 |
| hugin-PC right 4  | 0 | 0 |
| hugin-PC left 1   | 0 | 0 |
| hugin-PC left 2   | 0 | 0 |
| hugin-PC left 3   | 0 | 0 |
| hugin-PC left 4   | 0 | 0 |
| hugin-RG right 1  | 0 | 0 |
| hugin-RG right 2  | 0 | 0 |
| hugin-RG left 1   | 0 | 0 |
| hugin-RG left 2   | 0 | 0 |
| hugin-VNC right 1 | 2 | 0 |
| hugin-VNC right 2 | 4 | 0 |
| hugin-VNC left 1  | 3 | 0 |
| hugin-VNC left 2  | 0 | 0 |
| hugin-PH right 1  | 0 | 0 |
| hugin-PH right 2  | 0 | 0 |
| hugin-PH left 1   | 0 | 0 |
| hugin-PH left 2   | 0 | 0 |

7.

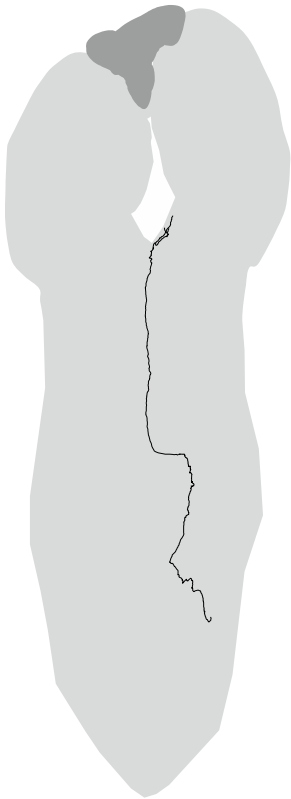

#11291344

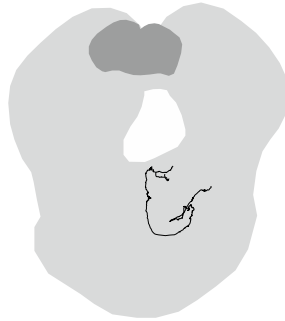

synapses to

synapses from

|                   |   |   |
|-------------------|---|---|
| hugin-PC right 1  | 0 | 0 |
| hugin-PC right 2  | 0 | 0 |
| hugin-PC right 3  | 0 | 0 |
| hugin-PC right 4  | 0 | 0 |
| hugin-PC left 1   | 0 | 0 |
| hugin-PC left 2   | 0 | 0 |
| hugin-PC left 3   | 0 | 0 |
| hugin-PC left 4   | 0 | 0 |
| hugin-RG right 1  | 0 | 0 |
| hugin-RG right 2  | 0 | 0 |
| hugin-RG left 1   | 0 | 0 |
| hugin-RG left 2   | 0 | 0 |
| hugin-VNC right 1 | 3 | 0 |
| hugin-VNC right 2 | 0 | 0 |
| hugin-VNC left 1  | 3 | 0 |
| hugin-VNC left 2  | 4 | 0 |
| hugin-PH right 1  | 0 | 0 |
| hugin-PH right 2  | 0 | 0 |
| hugin-PH left 1   | 0 | 0 |
| hugin-PH left 2   | 0 | 0 |

8.

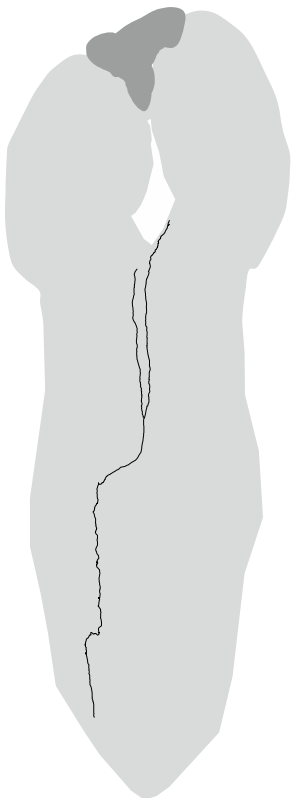

#7340629

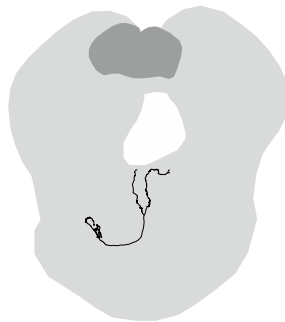

synapses to

synapses from

|                   |   |   |
|-------------------|---|---|
| hugin-PC right 1  | 0 | 0 |
| hugin-PC right 2  | 0 | 0 |
| hugin-PC right 3  | 0 | 0 |
| hugin-PC right 4  | 0 | 0 |
| hugin-PC left 1   | 0 | 0 |
| hugin-PC left 2   | 0 | 0 |
| hugin-PC left 3   | 0 | 0 |
| hugin-PC left 4   | 0 | 0 |
| hugin-RG right 1  | 0 | 0 |
| hugin-RG right 2  | 0 | 0 |
| hugin-RG left 1   | 0 | 0 |
| hugin-RG left 2   | 0 | 0 |
| hugin-VNC right 1 | 1 | 0 |
| hugin-VNC right 2 | 0 | 0 |
| hugin-VNC left 1  | 1 | 0 |
| hugin-VNC left 2  | 2 | 0 |
| hugin-PH right 1  | 0 | 0 |
| hugin-PH right 2  | 0 | 0 |
| hugin-PH left 1   | 0 | 0 |
| hugin-PH left 2   | 0 | 0 |

9.

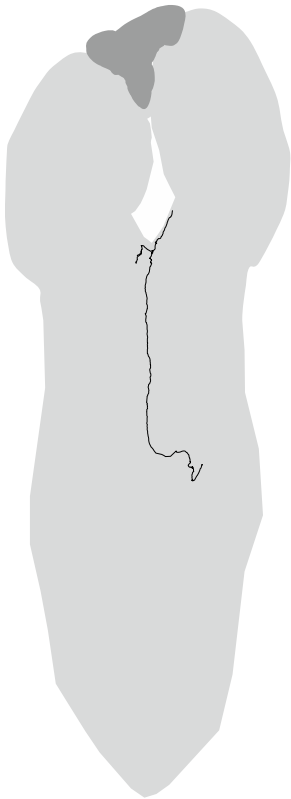

#10852875

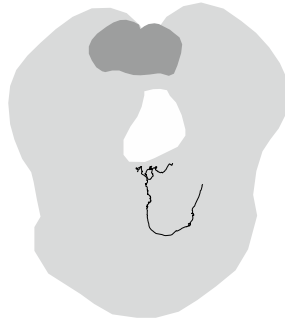

synapses to

synapses from

|                   |   |   |
|-------------------|---|---|
| hugin-PC right 1  | 0 | 0 |
| hugin-PC right 2  | 0 | 0 |
| hugin-PC right 3  | 0 | 0 |
| hugin-PC right 4  | 0 | 0 |
| hugin-PC left 1   | 0 | 0 |
| hugin-PC left 2   | 0 | 0 |
| hugin-PC left 3   | 0 | 0 |
| hugin-PC left 4   | 0 | 0 |
| hugin-RG right 1  | 0 | 0 |
| hugin-RG right 2  | 1 | 0 |
| hugin-RG left 1   | 0 | 0 |
| hugin-RG left 2   | 0 | 0 |
| hugin-VNC right 1 | 6 | 0 |
| hugin-VNC right 2 | 0 | 0 |
| hugin-VNC left 1  | 0 | 0 |
| hugin-VNC left 2  | 0 | 0 |
| hugin-PH right 1  | 0 | 0 |
| hugin-PH right 2  | 0 | 0 |
| hugin-PH left 1   | 0 | 0 |
| hugin-PH left 2   | 0 | 0 |

10.

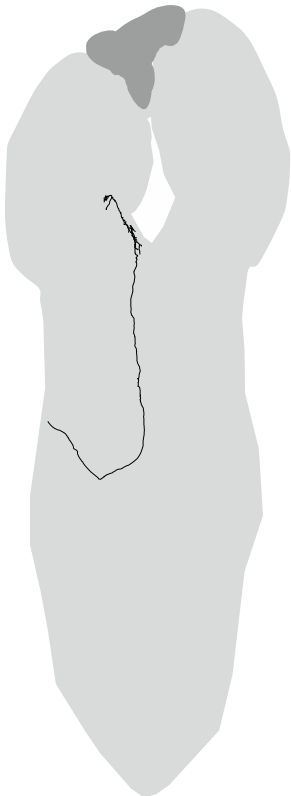

#11874130

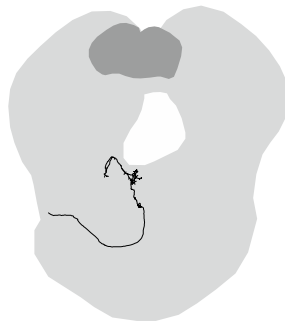

synapses to

synapses from

|                   |   |   |
|-------------------|---|---|
| hugin-PC right 1  | 0 | 0 |
| hugin-PC right 2  | 0 | 0 |
| hugin-PC right 3  | 0 | 0 |
| hugin-PC right 4  | 0 | 0 |
| hugin-PC left 1   | 0 | 0 |
| hugin-PC left 2   | 0 | 0 |
| hugin-PC left 3   | 1 | 0 |
| hugin-PC left 4   | 0 | 0 |
| hugin-RG right 1  | 0 | 0 |
| hugin-RG right 2  | 0 | 0 |
| hugin-RG left 1   | 0 | 0 |
| hugin-RG left 2   | 0 | 0 |
| hugin-VNC right 1 | 1 | 0 |
| hugin-VNC right 2 | 3 | 0 |
| hugin-VNC left 1  | 2 | 0 |
| hugin-VNC left 2  | 0 | 0 |
| hugin-PH right 1  | 0 | 0 |
| hugin-PH right 2  | 0 | 0 |
| hugin-PH left 1   | 0 | 0 |
| hugin-PH left 2   | 0 | 0 |

11.

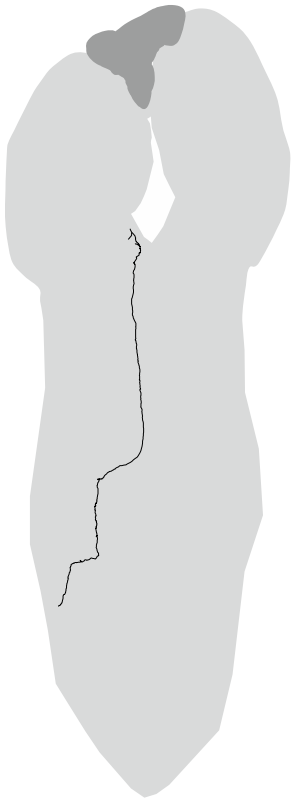

#9835169

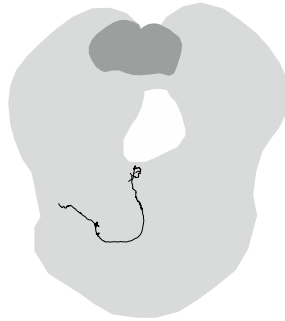

synapses to

synapses from

|                   |   |   |
|-------------------|---|---|
| hugin-PC right 1  | 0 | 0 |
| hugin-PC right 2  | 0 | 0 |
| hugin-PC right 3  | 0 | 0 |
| hugin-PC right 4  | 0 | 0 |
| hugin-PC left 1   | 0 | 0 |
| hugin-PC left 2   | 0 | 0 |
| hugin-PC left 3   | 0 | 0 |
| hugin-PC left 4   | 1 | 0 |
| hugin-RG right 1  | 0 | 0 |
| hugin-RG right 2  | 0 | 0 |
| hugin-RG left 1   | 0 | 0 |
| hugin-RG left 2   | 0 | 0 |
| hugin-VNC right 1 | 1 | 0 |
| hugin-VNC right 2 | 1 | 0 |
| hugin-VNC left 1  | 0 | 0 |
| hugin-VNC left 2  | 0 | 0 |
| hugin-PH right 1  | 0 | 0 |
| hugin-PH right 2  | 0 | 0 |
| hugin-PH left 1   | 0 | 0 |
| hugin-PH left 2   | 0 | 0 |



## J Interneurons

1.

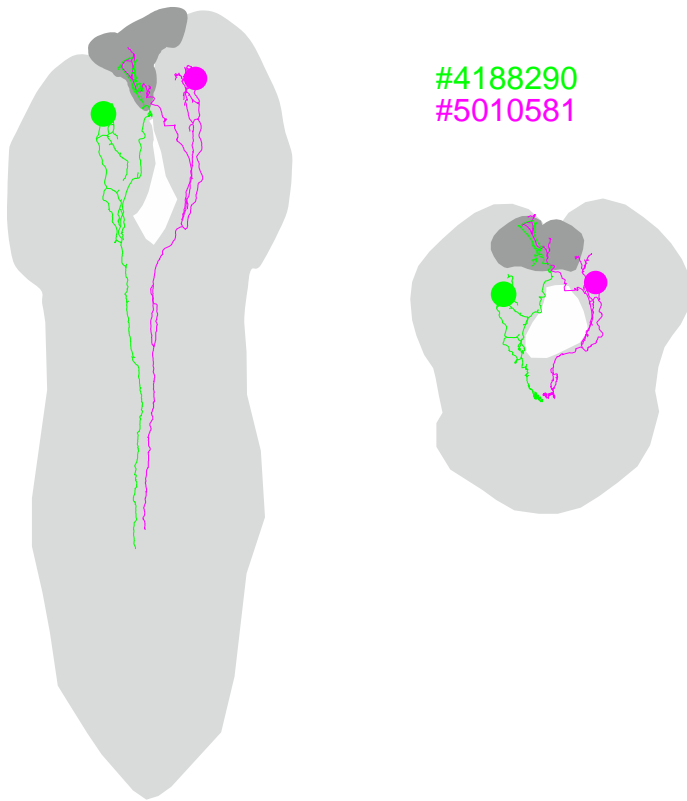

synapses to

synapses from

|                   |   |   |   |   |
|-------------------|---|---|---|---|
| hugin-PC right 1  | 0 | 0 | 0 | 0 |
| hugin-PC right 2  | 0 | 0 | 0 | 0 |
| hugin-PC right 3  | 0 | 0 | 0 | 0 |
| hugin-PC right 4  | 0 | 0 | 0 | 0 |
| hugin-PC left 1   | 0 | 0 | 0 | 0 |
| hugin-PC left 2   | 0 | 0 | 0 | 0 |
| hugin-PC left 3   | 0 | 0 | 0 | 0 |
| hugin-PC left 4   | 0 | 0 | 0 | 0 |
| hugin-RG right 1  | 0 | 0 | 1 | 1 |
| hugin-RG right 2  | 2 | 0 | 3 | 1 |
| hugin-RG left 1   | 1 | 0 | 0 | 0 |
| hugin-RG left 2   | 0 | 0 | 0 | 0 |
| hugin-VNC right 1 | 0 | 0 | 0 | 0 |
| hugin-VNC right 2 | 0 | 0 | 0 | 0 |
| hugin-VNC left 1  | 0 | 0 | 0 | 0 |
| hugin-VNC left 2  | 0 | 0 | 0 | 0 |
| hugin-PH right 1  | 0 | 0 | 0 | 0 |
| hugin-PH right 2  | 0 | 0 | 0 | 0 |
| hugin-PH left 1   | 0 | 0 | 0 | 0 |
| hugin-PH left 2   | 0 | 0 | 0 | 0 |

2.

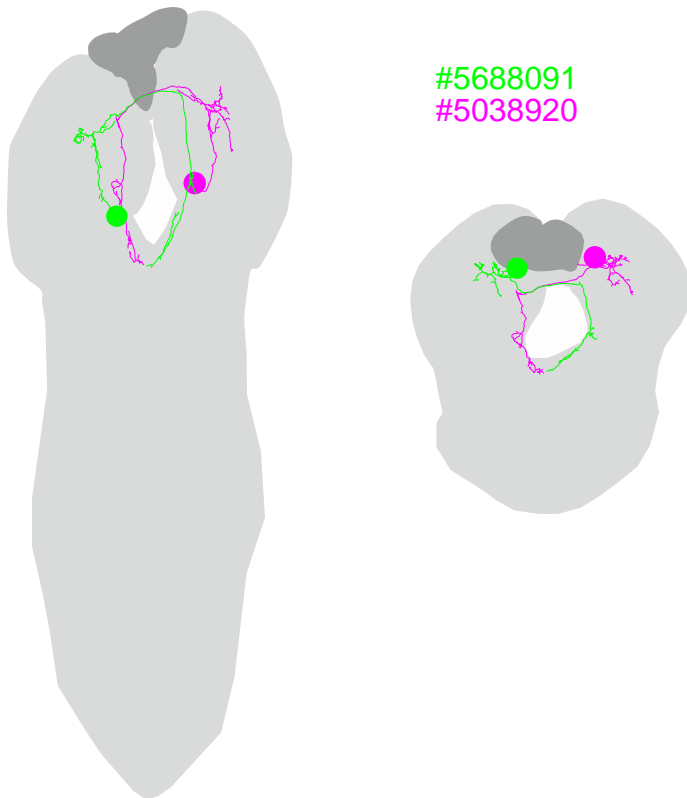

synapses to

synapses from

|                   |   |    |   |   |
|-------------------|---|----|---|---|
| hugin-PC right 1  | 0 | 0  | 0 | 0 |
| hugin-PC right 2  | 0 | 0  | 0 | 0 |
| hugin-PC right 3  | 0 | 0  | 0 | 0 |
| hugin-PC right 4  | 0 | 0  | 0 | 0 |
| hugin-PC left 1   | 0 | 0  | 0 | 0 |
| hugin-PC left 2   | 0 | 0  | 0 | 0 |
| hugin-PC left 3   | 0 | 2  | 0 | 0 |
| hugin-PC left 4   | 0 | 0  | 0 | 0 |
| hugin-RG right 1  | 6 | 5  | 0 | 0 |
| hugin-RG right 2  | 8 | 5  | 0 | 0 |
| hugin-RG left 1   | 2 | 11 | 0 | 0 |
| hugin-RG left 2   | 2 | 12 | 0 | 0 |
| hugin-VNC right 1 | 0 | 0  | 0 | 0 |
| hugin-VNC right 2 | 0 | 2  | 0 | 0 |
| hugin-VNC left 1  | 0 | 0  | 0 | 0 |
| hugin-VNC left 2  | 0 | 0  | 0 | 0 |
| hugin-PH right 1  | 0 | 0  | 0 | 0 |
| hugin-PH right 2  | 0 | 0  | 0 | 0 |
| hugin-PH left 1   | 0 | 0  | 0 | 0 |
| hugin-PH left 2   | 0 | 0  | 0 | 0 |

3.

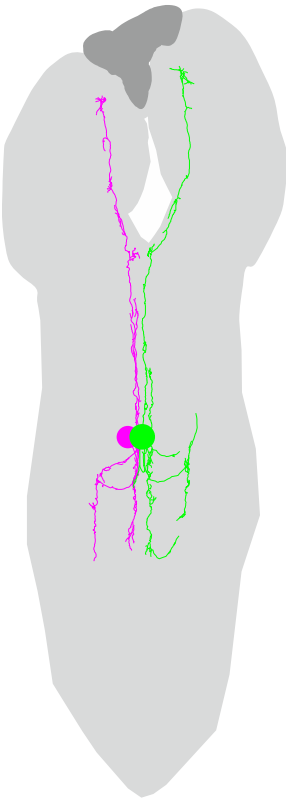

#5531637  
#327976

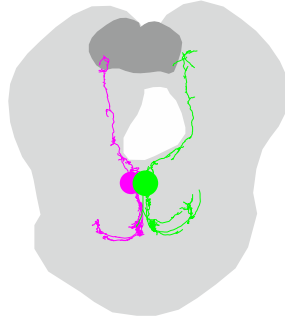

synapses to

synapses from

|                   |   |    |   |   |
|-------------------|---|----|---|---|
| hugin-PC right 1  | 0 | 0  | 0 | 0 |
| hugin-PC right 2  | 0 | 0  | 0 | 0 |
| hugin-PC right 3  | 0 | 0  | 0 | 0 |
| hugin-PC right 4  | 0 | 0  | 0 | 0 |
| hugin-PC left 1   | 0 | 0  | 0 | 0 |
| hugin-PC left 2   | 0 | 1  | 0 | 0 |
| hugin-PC left 3   | 0 | 4  | 0 | 0 |
| hugin-PC left 4   | 0 | 0  | 0 | 0 |
| hugin-RG right 1  | 2 | 1  | 0 | 0 |
| hugin-RG right 2  | 3 | 1  | 0 | 0 |
| hugin-RG left 1   | 2 | 8  | 0 | 0 |
| hugin-RG left 2   | 0 | 0  | 0 | 0 |
| hugin-VNC right 1 | 5 | 2  | 0 | 0 |
| hugin-VNC right 2 | 0 | 10 | 0 | 0 |
| hugin-VNC left 1  | 4 | 5  | 0 | 0 |
| hugin-VNC left 2  | 1 | 0  | 0 | 0 |
| hugin-PH right 1  | 0 | 0  | 0 | 0 |
| hugin-PH right 2  | 0 | 0  | 0 | 0 |
| hugin-PH left 1   | 0 | 0  | 0 | 0 |
| hugin-PH left 2   | 0 | 0  | 0 | 0 |

4.

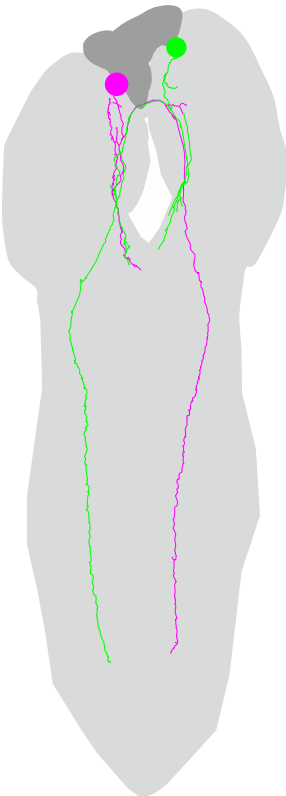

#3595837  
#10728318

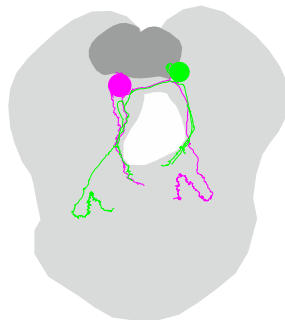

synapses to

synapses from

|                   |   |   |   |   |
|-------------------|---|---|---|---|
| hugin-PC right 1  | 0 | 0 | 0 | 0 |
| hugin-PC right 2  | 0 | 0 | 0 | 0 |
| hugin-PC right 3  | 0 | 0 | 0 | 0 |
| hugin-PC right 4  | 0 | 0 | 0 | 0 |
| hugin-PC left 1   | 0 | 0 | 0 | 0 |
| hugin-PC left 2   | 0 | 0 | 0 | 0 |
| hugin-PC left 3   | 0 | 0 | 0 | 0 |
| hugin-PC left 4   | 0 | 0 | 0 | 0 |
| hugin-RG right 1  | 0 | 0 | 0 | 0 |
| hugin-RG right 2  | 0 | 0 | 0 | 0 |
| hugin-RG left 1   | 0 | 0 | 0 | 0 |
| hugin-RG left 2   | 0 | 0 | 0 | 0 |
| hugin-VNC right 1 | 4 | 0 | 0 | 0 |
| hugin-VNC right 2 | 6 | 0 | 1 | 0 |
| hugin-VNC left 1  | 0 | 5 | 0 | 0 |
| hugin-VNC left 2  | 0 | 3 | 0 | 1 |
| hugin-PH right 1  | 0 | 0 | 0 | 0 |
| hugin-PH right 2  | 0 | 0 | 0 | 0 |
| hugin-PH left 1   | 0 | 0 | 0 | 0 |
| hugin-PH left 2   | 0 | 0 | 0 | 0 |

5.

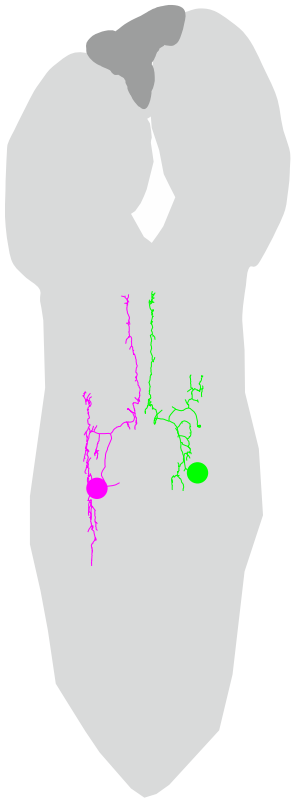

#4884547  
#12042430

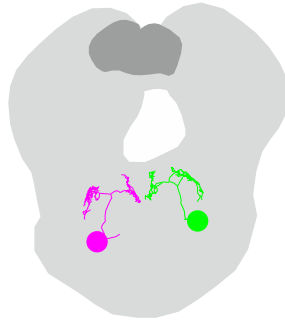

synapses to

synapses from

|                   |   |   |   |   |
|-------------------|---|---|---|---|
| hugin-PC right 1  | 0 | 0 | 0 | 0 |
| hugin-PC right 2  | 0 | 0 | 0 | 0 |
| hugin-PC right 3  | 0 | 0 | 0 | 0 |
| hugin-PC right 4  | 0 | 0 | 0 | 0 |
| hugin-PC left 1   | 0 | 0 | 0 | 0 |
| hugin-PC left 2   | 0 | 0 | 0 | 0 |
| hugin-PC left 3   | 0 | 0 | 0 | 0 |
| hugin-PC left 4   | 0 | 0 | 0 | 0 |
| hugin-RG right 1  | 0 | 0 | 0 | 0 |
| hugin-RG right 2  | 0 | 0 | 0 | 0 |
| hugin-RG left 1   | 0 | 0 | 0 | 0 |
| hugin-RG left 2   | 0 | 0 | 0 | 0 |
| hugin-VNC right 1 | 0 | 0 | 0 | 7 |
| hugin-VNC right 2 | 0 | 0 | 0 | 7 |
| hugin-VNC left 1  | 0 | 0 | 3 | 0 |
| hugin-VNC left 2  | 0 | 0 | 3 | 0 |
| hugin-PH right 1  | 0 | 0 | 0 | 0 |
| hugin-PH right 2  | 0 | 0 | 0 | 0 |
| hugin-PH left 1   | 0 | 0 | 0 | 0 |
| hugin-PH left 2   | 0 | 0 | 0 | 0 |

6.

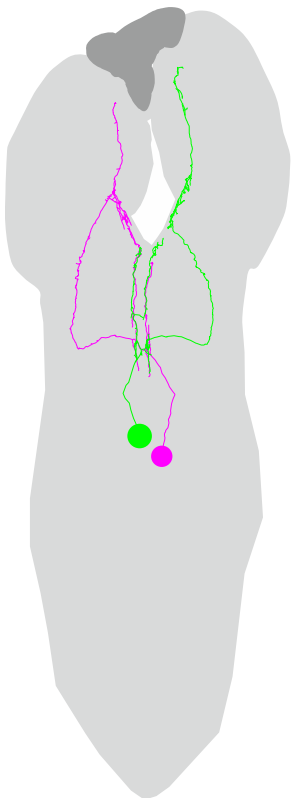

#5614978  
#9935752

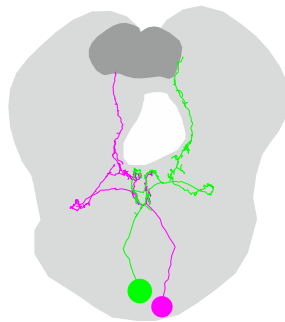

synapses to

synapses from

|                   |   |   |   |   |
|-------------------|---|---|---|---|
| hugin-PC right 1  | 0 | 0 | 0 | 0 |
| hugin-PC right 2  | 7 | 0 | 1 | 0 |
| hugin-PC right 3  | 2 | 0 | 2 | 0 |
| hugin-PC right 4  | 2 | 0 | 0 | 0 |
| hugin-PC left 1   | 0 | 0 | 0 | 0 |
| hugin-PC left 2   | 0 | 0 | 0 | 0 |
| hugin-PC left 3   | 0 | 1 | 0 | 0 |
| hugin-PC left 4   | 0 | 4 | 0 | 0 |
| hugin-RG right 1  | 1 | 0 | 0 | 0 |
| hugin-RG right 2  | 3 | 0 | 0 | 0 |
| hugin-RG left 1   | 0 | 0 | 0 | 0 |
| hugin-RG left 2   | 0 | 1 | 0 | 0 |
| hugin-VNC right 1 | 0 | 0 | 0 | 1 |
| hugin-VNC right 2 | 0 | 2 | 0 | 0 |
| hugin-VNC left 1  | 0 | 0 | 0 | 0 |
| hugin-VNC left 2  | 0 | 0 | 0 | 0 |
| hugin-PH right 1  | 0 | 0 | 0 | 0 |
| hugin-PH right 2  | 0 | 0 | 0 | 0 |
| hugin-PH left 1   | 0 | 0 | 0 | 0 |
| hugin-PH left 2   | 0 | 0 | 0 | 0 |

7.

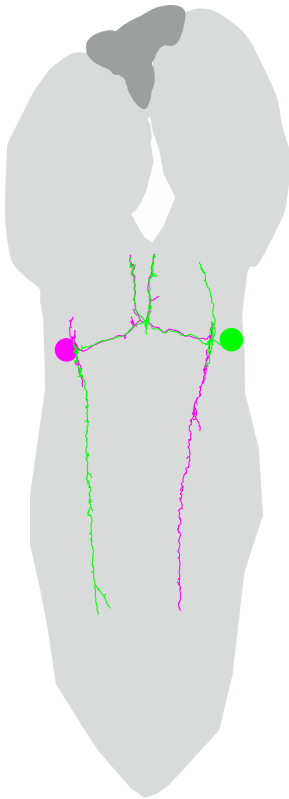

#8008617  
#5644800

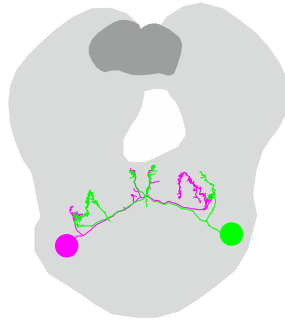

synapses to

synapses from

|                   |   |   |   |   |
|-------------------|---|---|---|---|
| hugin-PC right 1  | 0 | 0 | 0 | 0 |
| hugin-PC right 2  | 0 | 0 | 0 | 0 |
| hugin-PC right 3  | 0 | 0 | 0 | 0 |
| hugin-PC right 4  | 0 | 0 | 0 | 0 |
| hugin-PC left 1   | 0 | 0 | 0 | 0 |
| hugin-PC left 2   | 0 | 0 | 0 | 0 |
| hugin-PC left 3   | 0 | 0 | 0 | 0 |
| hugin-PC left 4   | 0 | 0 | 0 | 0 |
| hugin-RG right 1  | 0 | 0 | 0 | 0 |
| hugin-RG right 2  | 0 | 0 | 0 | 0 |
| hugin-RG left 1   | 0 | 0 | 0 | 0 |
| hugin-RG left 2   | 0 | 0 | 0 | 0 |
| hugin-VNC right 1 | 1 | 0 | 5 | 4 |
| hugin-VNC right 2 | 0 | 0 | 3 | 2 |
| hugin-VNC left 1  | 0 | 1 | 4 | 7 |
| hugin-VNC left 2  | 0 | 1 | 6 | 5 |
| hugin-PH right 1  | 0 | 0 | 0 | 0 |
| hugin-PH right 2  | 0 | 0 | 0 | 0 |
| hugin-PH left 1   | 0 | 0 | 0 | 0 |
| hugin-PH left 2   | 0 | 0 | 0 | 0 |

8.

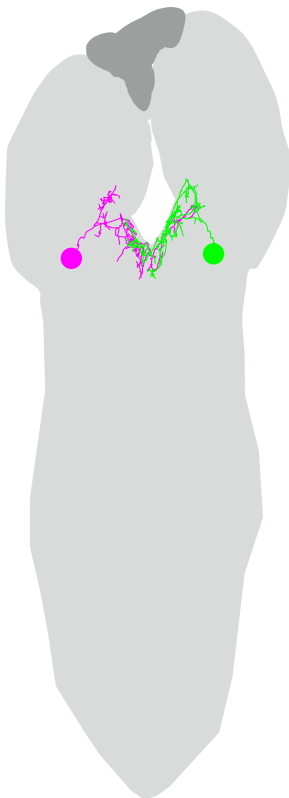

#16575803  
#4364826

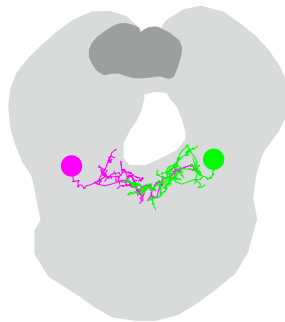

synapses to

synapses from

|                   |   |   |   |   |
|-------------------|---|---|---|---|
| hugin-PC right 1  | 3 | 0 | 0 | 0 |
| hugin-PC right 2  | 0 | 0 | 0 | 0 |
| hugin-PC right 3  | 0 | 4 | 0 | 0 |
| hugin-PC right 4  | 3 | 2 | 3 | 1 |
| hugin-PC left 1   | 2 | 2 | 1 | 3 |
| hugin-PC left 2   | 4 | 2 | 0 | 0 |
| hugin-PC left 3   | 0 | 0 | 2 | 0 |
| hugin-PC left 4   | 2 | 0 | 0 | 0 |
| hugin-RG right 1  | 0 | 0 | 0 | 0 |
| hugin-RG right 2  | 0 | 0 | 0 | 0 |
| hugin-RG left 1   | 0 | 0 | 0 | 0 |
| hugin-RG left 2   | 0 | 0 | 0 | 0 |
| hugin-VNC right 1 | 0 | 0 | 0 | 0 |
| hugin-VNC right 2 | 0 | 0 | 0 | 0 |
| hugin-VNC left 1  | 0 | 0 | 0 | 0 |
| hugin-VNC left 2  | 0 | 0 | 0 | 0 |
| hugin-PH right 1  | 0 | 0 | 0 | 0 |
| hugin-PH right 2  | 0 | 0 | 0 | 0 |
| hugin-PH left 1   | 0 | 0 | 0 | 0 |
| hugin-PH left 2   | 0 | 0 | 0 | 0 |

9.

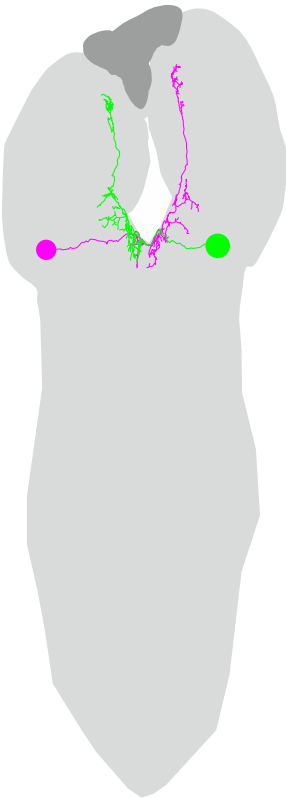

#3420915  
#3622234

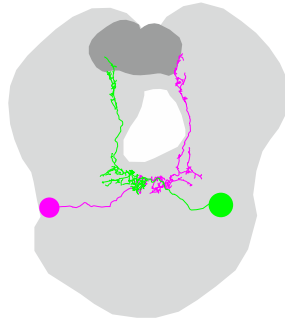

synapses to

synapses from

|                   |   |   |   |   |
|-------------------|---|---|---|---|
| hugin-PC right 1  | 0 | 0 | 0 | 0 |
| hugin-PC right 2  | 0 | 0 | 0 | 1 |
| hugin-PC right 3  | 0 | 1 | 0 | 1 |
| hugin-PC right 4  | 0 | 0 | 0 | 2 |
| hugin-PC left 1   | 2 | 0 | 0 | 0 |
| hugin-PC left 2   | 0 | 0 | 2 | 0 |
| hugin-PC left 3   | 2 | 0 | 4 | 0 |
| hugin-PC left 4   | 0 | 0 | 1 | 1 |
| hugin-RG right 1  | 0 | 0 | 0 | 0 |
| hugin-RG right 2  | 0 | 0 | 0 | 0 |
| hugin-RG left 1   | 0 | 0 | 0 | 0 |
| hugin-RG left 2   | 0 | 0 | 0 | 0 |
| hugin-VNC right 1 | 0 | 2 | 0 | 0 |
| hugin-VNC right 2 | 1 | 0 | 0 | 0 |
| hugin-VNC left 1  | 4 | 0 | 1 | 0 |
| hugin-VNC left 2  | 0 | 2 | 0 | 0 |
| hugin-PH right 1  | 0 | 0 | 0 | 0 |
| hugin-PH right 2  | 0 | 0 | 0 | 0 |
| hugin-PH left 1   | 0 | 0 | 0 | 0 |
| hugin-PH left 2   | 0 | 0 | 0 | 0 |

10.

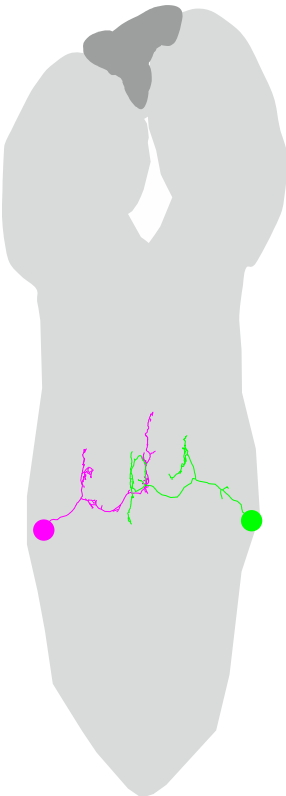

#5860970  
#3722787

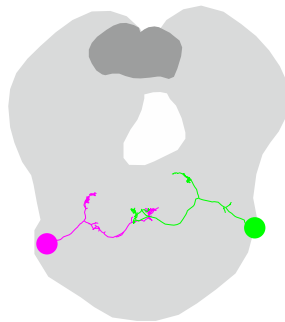

synapses to

synapses from

|                   |   |   |   |   |
|-------------------|---|---|---|---|
| hugin-PC right 1  | 0 | 0 | 0 | 0 |
| hugin-PC right 2  | 0 | 0 | 0 | 0 |
| hugin-PC right 3  | 0 | 0 | 0 | 0 |
| hugin-PC right 4  | 0 | 0 | 0 | 0 |
| hugin-PC left 1   | 0 | 0 | 0 | 0 |
| hugin-PC left 2   | 0 | 0 | 0 | 0 |
| hugin-PC left 3   | 0 | 0 | 0 | 0 |
| hugin-PC left 4   | 0 | 0 | 0 | 0 |
| hugin-RG right 1  | 0 | 0 | 0 | 0 |
| hugin-RG right 2  | 0 | 0 | 0 | 0 |
| hugin-RG left 1   | 0 | 0 | 0 | 0 |
| hugin-RG left 2   | 0 | 0 | 0 | 0 |
| hugin-VNC right 1 | 0 | 0 | 0 | 5 |
| hugin-VNC right 2 | 0 | 0 | 0 | 1 |
| hugin-VNC left 1  | 0 | 0 | 6 | 0 |
| hugin-VNC left 2  | 0 | 0 | 4 | 0 |
| hugin-PH right 1  | 0 | 0 | 0 | 0 |
| hugin-PH right 2  | 0 | 0 | 0 | 0 |
| hugin-PH left 1   | 0 | 0 | 0 | 0 |
| hugin-PH left 2   | 0 | 0 | 0 | 0 |

11.

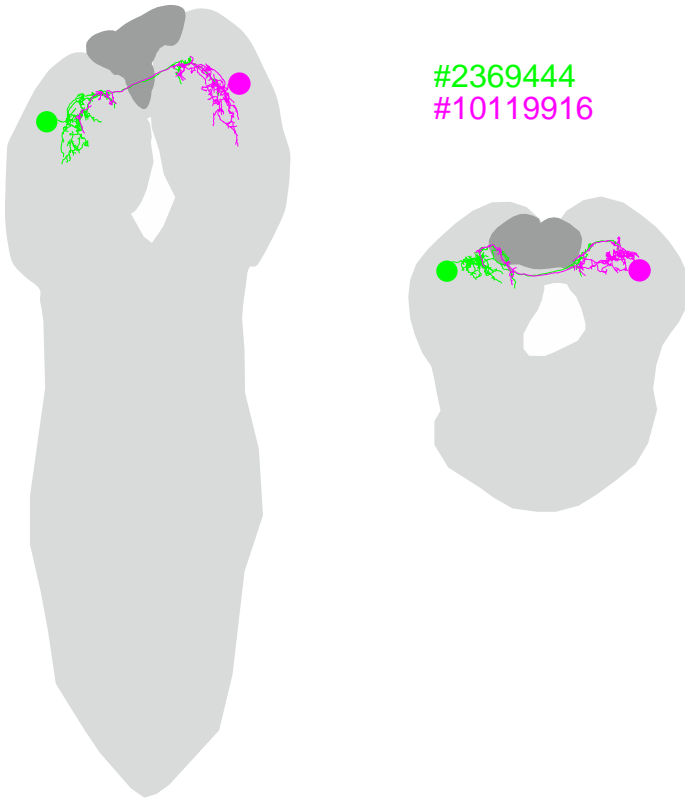

synapses to

synapses from

|                   |    |    |   |   |
|-------------------|----|----|---|---|
| hugin-PC right 1  | 12 | 9  | 0 | 1 |
| hugin-PC right 2  | 6  | 4  | 1 | 0 |
| hugin-PC right 3  | 4  | 6  | 0 | 0 |
| hugin-PC right 4  | 7  | 13 | 1 | 2 |
| hugin-PC left 1   | 4  | 12 | 3 | 1 |
| hugin-PC left 2   | 10 | 7  | 2 | 1 |
| hugin-PC left 3   | 0  | 3  | 2 | 0 |
| hugin-PC left 4   | 8  | 7  | 1 | 2 |
| hugin-RG right 1  | 0  | 0  | 0 | 0 |
| hugin-RG right 2  | 0  | 0  | 0 | 0 |
| hugin-RG left 1   | 0  | 0  | 0 | 0 |
| hugin-RG left 2   | 0  | 0  | 0 | 0 |
| hugin-VNC right 1 | 0  | 0  | 0 | 0 |
| hugin-VNC right 2 | 0  | 0  | 0 | 0 |
| hugin-VNC left 1  | 0  | 0  | 0 | 0 |
| hugin-VNC left 2  | 0  | 0  | 0 | 0 |
| hugin-PH right 1  | 0  | 0  | 0 | 0 |
| hugin-PH right 2  | 0  | 0  | 0 | 0 |
| hugin-PH left 1   | 0  | 0  | 0 | 0 |
| hugin-PH left 2   | 0  | 0  | 0 | 0 |

12.

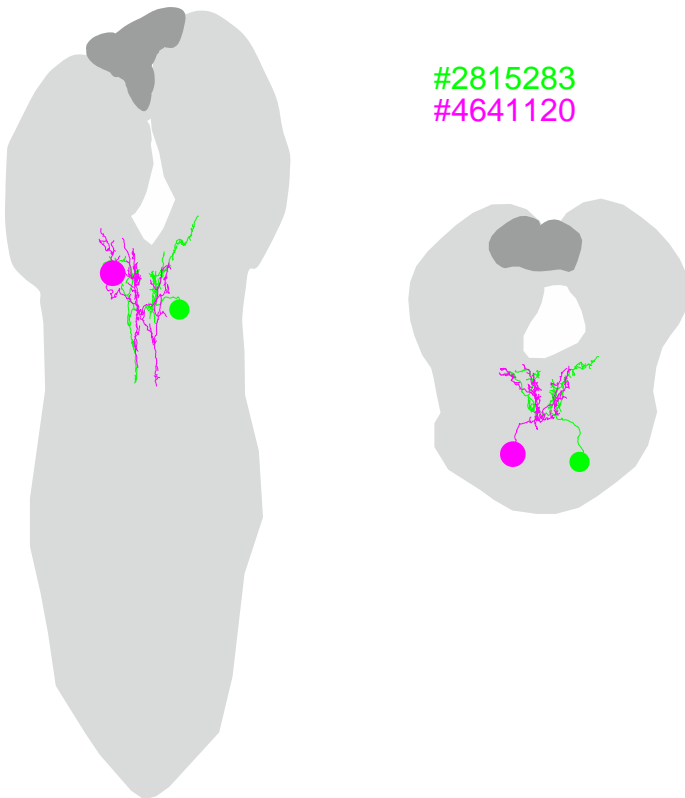

synapses to

synapses from

|                   |    |   |   |   |
|-------------------|----|---|---|---|
| hugin-PC right 1  | 0  | 0 | 0 | 0 |
| hugin-PC right 2  | 0  | 0 | 0 | 0 |
| hugin-PC right 3  | 0  | 0 | 0 | 0 |
| hugin-PC right 4  | 0  | 0 | 0 | 0 |
| hugin-PC left 1   | 0  | 0 | 0 | 0 |
| hugin-PC left 2   | 0  | 0 | 0 | 0 |
| hugin-PC left 3   | 0  | 0 | 0 | 0 |
| hugin-PC left 4   | 0  | 0 | 0 | 0 |
| hugin-RG right 1  | 0  | 0 | 0 | 0 |
| hugin-RG right 2  | 0  | 0 | 0 | 0 |
| hugin-RG left 1   | 0  | 0 | 0 | 0 |
| hugin-RG left 2   | 0  | 0 | 0 | 0 |
| hugin-VNC right 1 | 0  | 0 | 0 | 0 |
| hugin-VNC right 2 | 0  | 0 | 0 | 0 |
| hugin-VNC left 1  | 0  | 0 | 0 | 0 |
| hugin-VNC left 2  | 0  | 0 | 0 | 0 |
| hugin-PH right 1  | 10 | 0 | 0 | 0 |
| hugin-PH right 2  | 7  | 4 | 0 | 0 |
| hugin-PH left 1   | 3  | 3 | 0 | 0 |
| hugin-PH left 2   | 3  | 4 | 0 | 0 |

13.

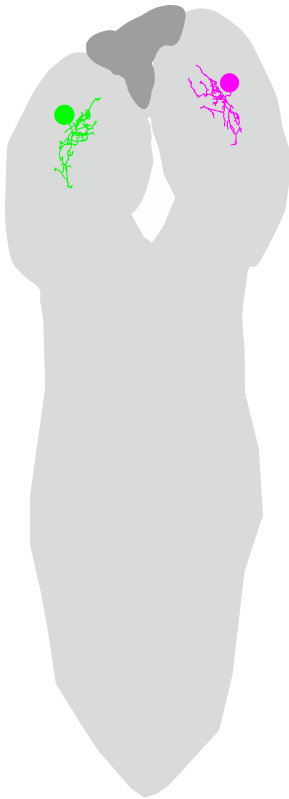

#4785242  
#2935198

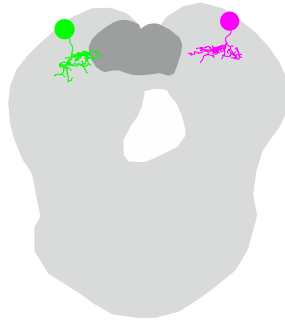

synapses to

synapses from

|                   |   |   |   |   |
|-------------------|---|---|---|---|
| hugin-PC right 1  | 0 | 0 | 0 | 0 |
| hugin-PC right 2  | 0 | 1 | 0 | 0 |
| hugin-PC right 3  | 0 | 0 | 0 | 0 |
| hugin-PC right 4  | 0 | 6 | 0 | 2 |
| hugin-PC left 1   | 2 | 0 | 0 | 0 |
| hugin-PC left 2   | 3 | 0 | 1 | 0 |
| hugin-PC left 3   | 0 | 0 | 0 | 0 |
| hugin-PC left 4   | 2 | 0 | 0 | 0 |
| hugin-RG right 1  | 0 | 0 | 0 | 0 |
| hugin-RG right 2  | 0 | 0 | 0 | 0 |
| hugin-RG left 1   | 0 | 0 | 0 | 0 |
| hugin-RG left 2   | 0 | 0 | 0 | 0 |
| hugin-VNC right 1 | 0 | 0 | 0 | 0 |
| hugin-VNC right 2 | 0 | 0 | 0 | 0 |
| hugin-VNC left 1  | 0 | 0 | 0 | 0 |
| hugin-VNC left 2  | 0 | 0 | 0 | 0 |
| hugin-PH right 1  | 0 | 0 | 0 | 0 |
| hugin-PH right 2  | 0 | 0 | 0 | 0 |
| hugin-PH left 1   | 0 | 0 | 0 | 0 |
| hugin-PH left 2   | 0 | 0 | 0 | 0 |

14.

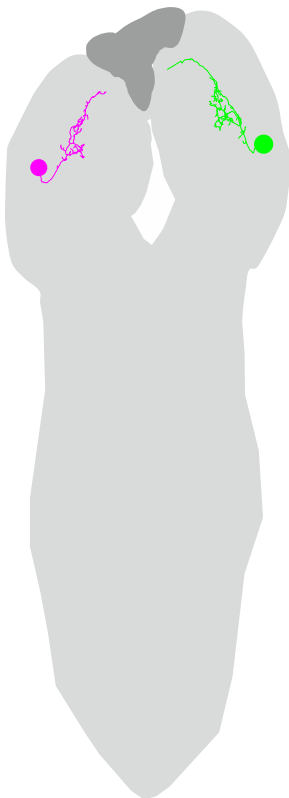

#2935173  
#3946432

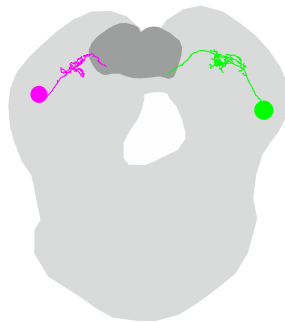

synapses to

synapses from

|                   |   |   |   |   |
|-------------------|---|---|---|---|
| hugin-PC right 1  | 4 | 0 | 0 | 0 |
| hugin-PC right 2  | 2 | 0 | 0 | 0 |
| hugin-PC right 3  | 0 | 0 | 0 | 0 |
| hugin-PC right 4  | 3 | 0 | 1 | 0 |
| hugin-PC left 1   | 0 | 0 | 0 | 0 |
| hugin-PC left 2   | 0 | 5 | 0 | 0 |
| hugin-PC left 3   | 0 | 0 | 0 | 0 |
| hugin-PC left 4   | 0 | 0 | 0 | 0 |
| hugin-RG right 1  | 0 | 0 | 0 | 0 |
| hugin-RG right 2  | 0 | 0 | 0 | 0 |
| hugin-RG left 1   | 0 | 0 | 0 | 0 |
| hugin-RG left 2   | 0 | 0 | 0 | 0 |
| hugin-VNC right 1 | 0 | 0 | 0 | 0 |
| hugin-VNC right 2 | 0 | 0 | 0 | 0 |
| hugin-VNC left 1  | 0 | 0 | 0 | 0 |
| hugin-VNC left 2  | 0 | 0 | 0 | 0 |
| hugin-PH right 1  | 0 | 0 | 0 | 0 |
| hugin-PH right 2  | 0 | 0 | 0 | 0 |
| hugin-PH left 1   | 0 | 0 | 0 | 0 |
| hugin-PH left 2   | 0 | 0 | 0 | 0 |

15.

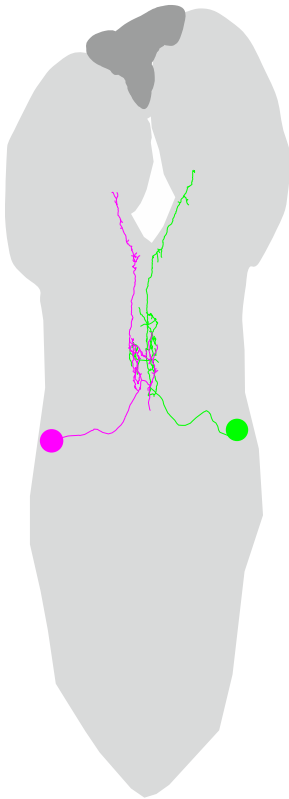

#5613144  
#7381964

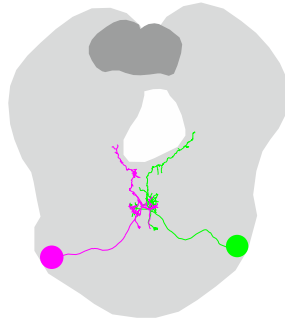

synapses to

synapses from

|                   |    |    |   |   |
|-------------------|----|----|---|---|
| hugin-PC right 1  | 0  | 0  | 0 | 0 |
| hugin-PC right 2  | 0  | 0  | 0 | 0 |
| hugin-PC right 3  | 0  | 0  | 0 | 0 |
| hugin-PC right 4  | 0  | 0  | 0 | 0 |
| hugin-PC left 1   | 0  | 0  | 0 | 0 |
| hugin-PC left 2   | 0  | 0  | 0 | 0 |
| hugin-PC left 3   | 0  | 1  | 0 | 0 |
| hugin-PC left 4   | 0  | 0  | 0 | 0 |
| hugin-RG right 1  | 12 | 4  | 0 | 0 |
| hugin-RG right 2  | 15 | 6  | 0 | 0 |
| hugin-RG left 1   | 6  | 9  | 0 | 0 |
| hugin-RG left 2   | 6  | 14 | 0 | 0 |
| hugin-VNC right 1 | 0  | 0  | 0 | 0 |
| hugin-VNC right 2 | 0  | 1  | 0 | 0 |
| hugin-VNC left 1  | 0  | 0  | 0 | 0 |
| hugin-VNC left 2  | 0  | 0  | 0 | 0 |
| hugin-PH right 1  | 0  | 1  | 0 | 0 |
| hugin-PH right 2  | 0  | 1  | 0 | 0 |
| hugin-PH left 1   | 0  | 0  | 0 | 0 |
| hugin-PH left 2   | 0  | 0  | 0 | 0 |

16.

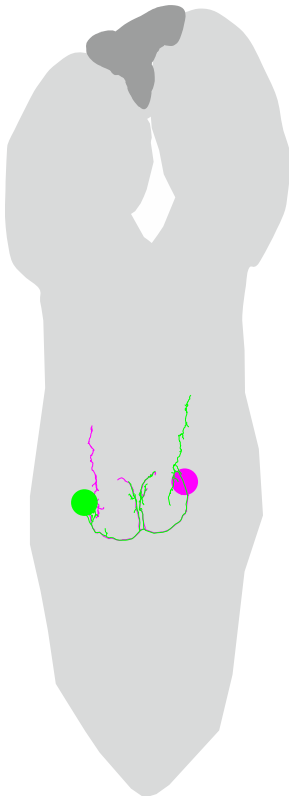

#4780447  
#1711076

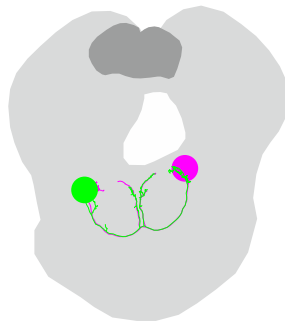

synapses to

synapses from

|                   |   |   |   |   |
|-------------------|---|---|---|---|
| hugin-PC right 1  | 0 | 0 | 0 | 0 |
| hugin-PC right 2  | 0 | 0 | 0 | 0 |
| hugin-PC right 3  | 0 | 0 | 0 | 0 |
| hugin-PC right 4  | 0 | 0 | 0 | 0 |
| hugin-PC left 1   | 0 | 0 | 0 | 0 |
| hugin-PC left 2   | 0 | 0 | 0 | 0 |
| hugin-PC left 3   | 0 | 0 | 0 | 0 |
| hugin-PC left 4   | 0 | 0 | 0 | 0 |
| hugin-RG right 1  | 0 | 0 | 0 | 0 |
| hugin-RG right 2  | 0 | 0 | 0 | 0 |
| hugin-RG left 1   | 0 | 0 | 0 | 0 |
| hugin-RG left 2   | 0 | 0 | 0 | 0 |
| hugin-VNC right 1 | 0 | 0 | 3 | 0 |
| hugin-VNC right 2 | 0 | 0 | 0 | 0 |
| hugin-VNC left 1  | 0 | 0 | 0 | 2 |
| hugin-VNC left 2  | 0 | 0 | 0 | 1 |
| hugin-PH right 1  | 0 | 0 | 0 | 0 |
| hugin-PH right 2  | 0 | 0 | 0 | 0 |
| hugin-PH left 1   | 0 | 0 | 0 | 0 |
| hugin-PH left 2   | 0 | 0 | 0 | 0 |



17.

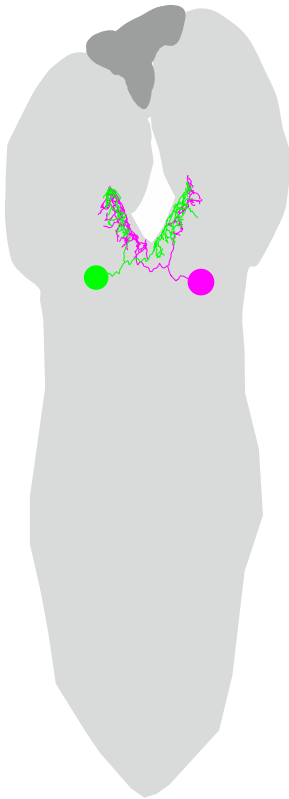

#9793489  
#15242799

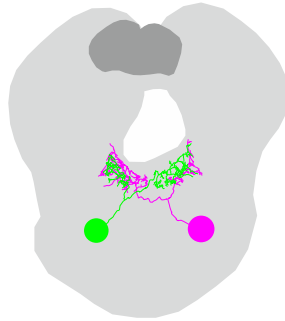

synapses to

synapses from

|                   |   |   |   |   |
|-------------------|---|---|---|---|
| hugin-PC right 1  | 0 | 0 | 0 | 0 |
| hugin-PC right 2  | 0 | 0 | 1 | 2 |
| hugin-PC right 3  | 0 | 1 | 0 | 0 |
| hugin-PC right 4  | 0 | 0 | 1 | 1 |
| hugin-PC left 1   | 0 | 1 | 2 | 3 |
| hugin-PC left 2   | 0 | 0 | 1 | 1 |
| hugin-PC left 3   | 1 | 1 | 3 | 0 |
| hugin-PC left 4   | 1 | 0 | 1 | 0 |
| hugin-RG right 1  | 0 | 0 | 0 | 0 |
| hugin-RG right 2  | 0 | 0 | 0 | 0 |
| hugin-RG left 1   | 0 | 0 | 0 | 0 |
| hugin-RG left 2   | 0 | 0 | 0 | 0 |
| hugin-VNC right 1 | 0 | 0 | 0 | 0 |
| hugin-VNC right 2 | 0 | 0 | 0 | 0 |
| hugin-VNC left 1  | 0 | 0 | 0 | 0 |
| hugin-VNC left 2  | 0 | 0 | 0 | 0 |
| hugin-PH right 1  | 0 | 0 | 0 | 0 |
| hugin-PH right 2  | 0 | 0 | 0 | 0 |
| hugin-PH left 1   | 0 | 0 | 0 | 0 |
| hugin-PH left 2   | 0 | 0 | 0 | 0 |

18.

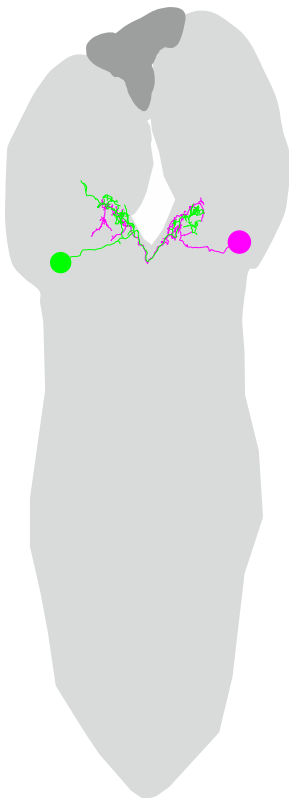

#9787565  
#3613276

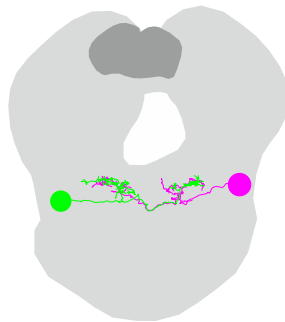

synapses to

synapses from

|                   |    |   |   |   |
|-------------------|----|---|---|---|
| hugin-PC right 1  | 5  | 0 | 0 | 2 |
| hugin-PC right 2  | 4  | 0 | 1 | 0 |
| hugin-PC right 3  | 2  | 0 | 1 | 0 |
| hugin-PC right 4  | 10 | 0 | 1 | 1 |
| hugin-PC left 1   | 0  | 4 | 0 | 0 |
| hugin-PC left 2   | 0  | 3 | 0 | 0 |
| hugin-PC left 3   | 0  | 4 | 0 | 1 |
| hugin-PC left 4   | 1  | 9 | 0 | 2 |
| hugin-RG right 1  | 0  | 0 | 0 | 0 |
| hugin-RG right 2  | 0  | 0 | 0 | 0 |
| hugin-RG left 1   | 0  | 0 | 0 | 0 |
| hugin-RG left 2   | 0  | 0 | 0 | 0 |
| hugin-VNC right 1 | 0  | 0 | 0 | 0 |
| hugin-VNC right 2 | 0  | 0 | 0 | 0 |
| hugin-VNC left 1  | 0  | 0 | 0 | 0 |
| hugin-VNC left 2  | 0  | 0 | 0 | 0 |
| hugin-PH right 1  | 0  | 0 | 0 | 0 |
| hugin-PH right 2  | 0  | 0 | 0 | 0 |
| hugin-PH left 1   | 0  | 0 | 0 | 0 |
| hugin-PH left 2   | 0  | 0 | 0 | 0 |

19.

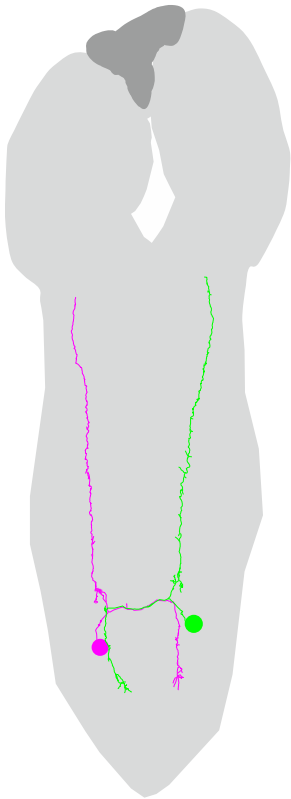

#2622502  
#8010889

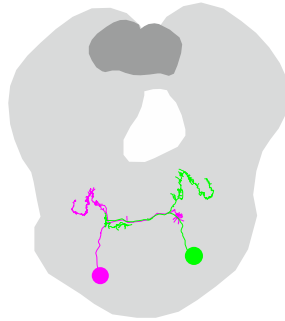

synapses to

synapses from

|                   |    |   |   |   |
|-------------------|----|---|---|---|
| hugin-PC right 1  | 0  | 0 | 0 | 0 |
| hugin-PC right 2  | 0  | 0 | 0 | 0 |
| hugin-PC right 3  | 0  | 0 | 0 | 0 |
| hugin-PC right 4  | 0  | 0 | 0 | 0 |
| hugin-PC left 1   | 0  | 0 | 0 | 0 |
| hugin-PC left 2   | 0  | 0 | 0 | 0 |
| hugin-PC left 3   | 0  | 0 | 0 | 0 |
| hugin-PC left 4   | 0  | 0 | 0 | 0 |
| hugin-RG right 1  | 0  | 0 | 0 | 0 |
| hugin-RG right 2  | 0  | 0 | 0 | 0 |
| hugin-RG left 1   | 0  | 0 | 0 | 0 |
| hugin-RG left 2   | 0  | 0 | 0 | 0 |
| hugin-VNC right 1 | 0  | 8 | 0 | 2 |
| hugin-VNC right 2 | 0  | 8 | 0 | 1 |
| hugin-VNC left 1  | 8  | 0 | 4 | 0 |
| hugin-VNC left 2  | 13 | 0 | 3 | 0 |
| hugin-PH right 1  | 0  | 0 | 0 | 0 |
| hugin-PH right 2  | 0  | 0 | 0 | 0 |
| hugin-PH left 1   | 0  | 0 | 0 | 0 |
| hugin-PH left 2   | 0  | 0 | 0 | 0 |

20.

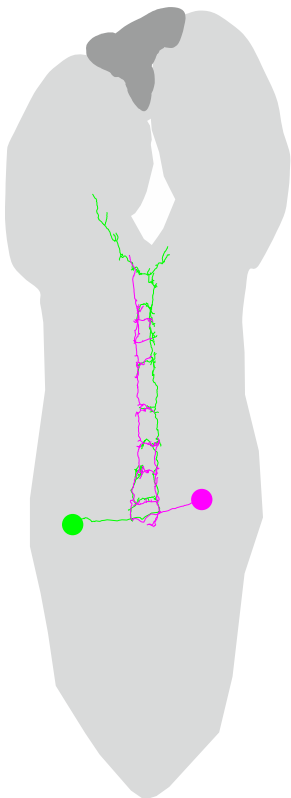

#14795310  
#14728550

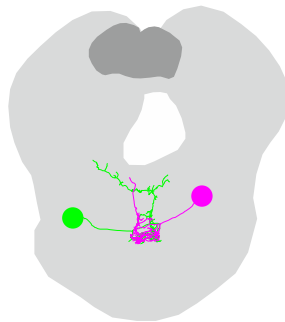

synapses to

synapses from

|                   |   |   |   |   |
|-------------------|---|---|---|---|
| hugin-PC right 1  | 0 | 0 | 0 | 0 |
| hugin-PC right 2  | 0 | 0 | 0 | 0 |
| hugin-PC right 3  | 0 | 0 | 0 | 0 |
| hugin-PC right 4  | 0 | 0 | 0 | 0 |
| hugin-PC left 1   | 0 | 0 | 0 | 0 |
| hugin-PC left 2   | 0 | 0 | 0 | 0 |
| hugin-PC left 3   | 0 | 0 | 0 | 0 |
| hugin-PC left 4   | 0 | 0 | 0 | 0 |
| hugin-RG right 1  | 0 | 0 | 0 | 0 |
| hugin-RG right 2  | 0 | 0 | 0 | 0 |
| hugin-RG left 1   | 0 | 0 | 0 | 0 |
| hugin-RG left 2   | 0 | 0 | 0 | 0 |
| hugin-VNC right 1 | 0 | 0 | 0 | 0 |
| hugin-VNC right 2 | 0 | 0 | 0 | 0 |
| hugin-VNC left 1  | 0 | 0 | 0 | 0 |
| hugin-VNC left 2  | 0 | 0 | 0 | 0 |
| hugin-PH right 1  | 3 | 0 | 0 | 0 |
| hugin-PH right 2  | 0 | 0 | 0 | 0 |
| hugin-PH left 1   | 2 | 0 | 0 | 0 |
| hugin-PH left 2   | 0 | 2 | 0 | 0 |

21.

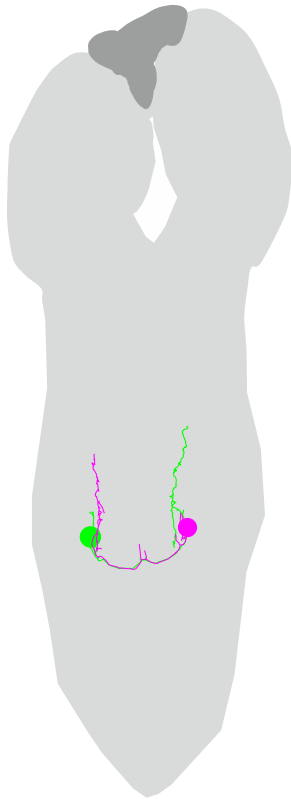

#9319255  
#2622540

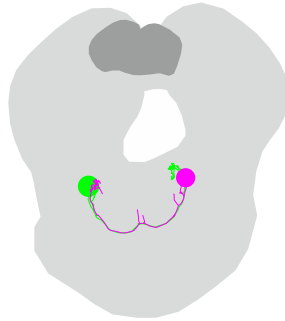

synapses to

synapses from

|                   |   |   |   |   |
|-------------------|---|---|---|---|
| hugin-PC right 1  | 0 | 0 | 0 | 0 |
| hugin-PC right 2  | 0 | 0 | 0 | 0 |
| hugin-PC right 3  | 0 | 0 | 0 | 0 |
| hugin-PC right 4  | 0 | 0 | 0 | 0 |
| hugin-PC left 1   | 0 | 0 | 0 | 0 |
| hugin-PC left 2   | 0 | 0 | 0 | 0 |
| hugin-PC left 3   | 0 | 0 | 0 | 0 |
| hugin-PC left 4   | 0 | 0 | 0 | 0 |
| hugin-RG right 1  | 0 | 0 | 0 | 0 |
| hugin-RG right 2  | 0 | 0 | 0 | 0 |
| hugin-RG left 1   | 0 | 0 | 0 | 0 |
| hugin-RG left 2   | 0 | 0 | 0 | 0 |
| hugin-VNC right 1 | 0 | 0 | 7 | 0 |
| hugin-VNC right 2 | 0 | 0 | 0 | 0 |
| hugin-VNC left 1  | 0 | 0 | 0 | 2 |
| hugin-VNC left 2  | 0 | 0 | 0 | 1 |
| hugin-PH right 1  | 0 | 0 | 0 | 0 |
| hugin-PH right 2  | 0 | 0 | 0 | 0 |
| hugin-PH left 1   | 0 | 0 | 0 | 0 |
| hugin-PH left 2   | 0 | 0 | 0 | 0 |

22.

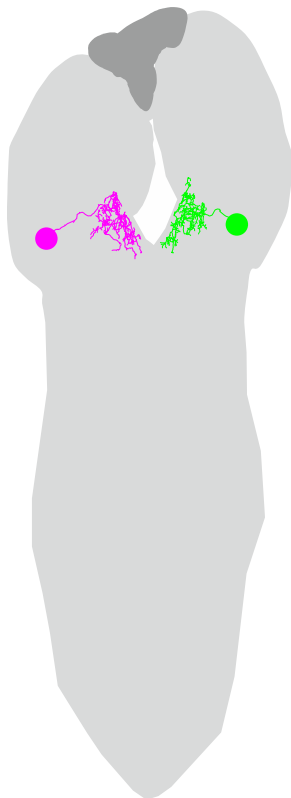

#9748981  
#7136254

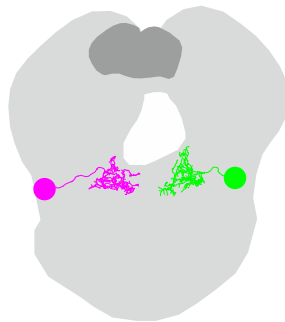

synapses to

synapses from

|                   |   |   |   |   |
|-------------------|---|---|---|---|
| hugin-PC right 1  | 1 | 0 | 0 | 0 |
| hugin-PC right 2  | 0 | 0 | 0 | 0 |
| hugin-PC right 3  | 2 | 0 | 3 | 0 |
| hugin-PC right 4  | 0 | 0 | 2 | 0 |
| hugin-PC left 1   | 0 | 0 | 0 | 2 |
| hugin-PC left 2   | 0 | 0 | 0 | 1 |
| hugin-PC left 3   | 0 | 0 | 0 | 0 |
| hugin-PC left 4   | 0 | 0 | 0 | 1 |
| hugin-RG right 1  | 0 | 0 | 0 | 0 |
| hugin-RG right 2  | 0 | 0 | 0 | 0 |
| hugin-RG left 1   | 0 | 0 | 0 | 0 |
| hugin-RG left 2   | 0 | 0 | 0 | 0 |
| hugin-VNC right 1 | 0 | 0 | 0 | 0 |
| hugin-VNC right 2 | 0 | 1 | 0 | 0 |
| hugin-VNC left 1  | 0 | 0 | 0 | 0 |
| hugin-VNC left 2  | 0 | 0 | 0 | 0 |
| hugin-PH right 1  | 0 | 0 | 0 | 0 |
| hugin-PH right 2  | 0 | 0 | 0 | 0 |
| hugin-PH left 1   | 0 | 0 | 0 | 0 |
| hugin-PH left 2   | 0 | 0 | 0 | 0 |

23.

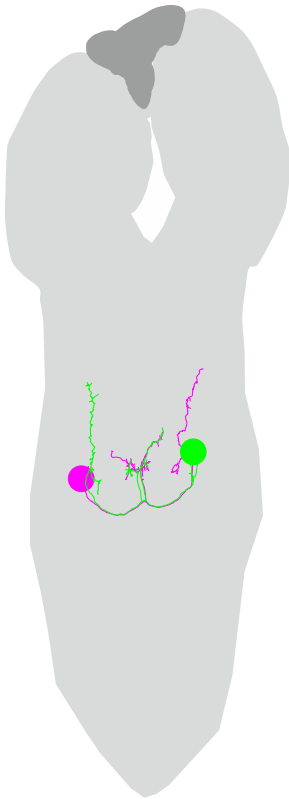

#4284599  
#8748462

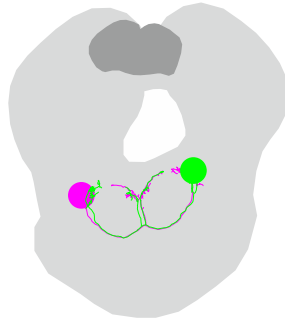

synapses to

synapses from

|                   |   |   |   |   |
|-------------------|---|---|---|---|
| hugin-PC right 1  | 0 | 0 | 0 | 0 |
| hugin-PC right 2  | 0 | 0 | 0 | 0 |
| hugin-PC right 3  | 0 | 0 | 0 | 0 |
| hugin-PC right 4  | 0 | 0 | 0 | 0 |
| hugin-PC left 1   | 0 | 0 | 0 | 0 |
| hugin-PC left 2   | 0 | 0 | 0 | 0 |
| hugin-PC left 3   | 0 | 0 | 0 | 0 |
| hugin-PC left 4   | 0 | 0 | 0 | 0 |
| hugin-RG right 1  | 0 | 0 | 0 | 0 |
| hugin-RG right 2  | 0 | 0 | 0 | 0 |
| hugin-RG left 1   | 0 | 0 | 0 | 0 |
| hugin-RG left 2   | 0 | 0 | 0 | 0 |
| hugin-VNC right 1 | 0 | 0 | 0 | 3 |
| hugin-VNC right 2 | 0 | 0 | 0 | 1 |
| hugin-VNC left 1  | 0 | 0 | 3 | 0 |
| hugin-VNC left 2  | 0 | 0 | 1 | 0 |
| hugin-PH right 1  | 0 | 0 | 0 | 0 |
| hugin-PH right 2  | 0 | 0 | 0 | 0 |
| hugin-PH left 1   | 0 | 0 | 0 | 0 |
| hugin-PH left 2   | 0 | 0 | 0 | 0 |

24.

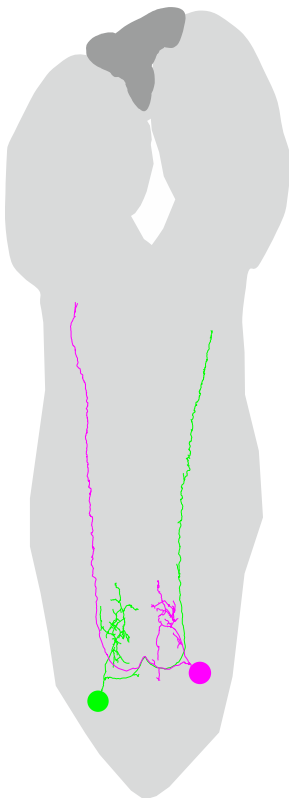

#11517136  
#9563254

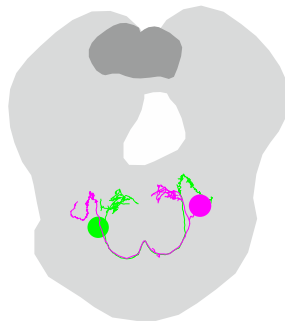

synapses to

synapses from

|                   |   |   |   |   |
|-------------------|---|---|---|---|
| hugin-PC right 1  | 0 | 0 | 0 | 0 |
| hugin-PC right 2  | 0 | 0 | 0 | 0 |
| hugin-PC right 3  | 0 | 0 | 0 | 0 |
| hugin-PC right 4  | 0 | 0 | 0 | 0 |
| hugin-PC left 1   | 0 | 0 | 0 | 0 |
| hugin-PC left 2   | 0 | 0 | 0 | 0 |
| hugin-PC left 3   | 0 | 0 | 0 | 0 |
| hugin-PC left 4   | 0 | 0 | 0 | 0 |
| hugin-RG right 1  | 0 | 0 | 0 | 0 |
| hugin-RG right 2  | 0 | 0 | 0 | 0 |
| hugin-RG left 1   | 0 | 0 | 0 | 0 |
| hugin-RG left 2   | 0 | 0 | 0 | 0 |
| hugin-VNC right 1 | 0 | 1 | 0 | 3 |
| hugin-VNC right 2 | 0 | 4 | 0 | 0 |
| hugin-VNC left 1  | 6 | 0 | 1 | 0 |
| hugin-VNC left 2  | 1 | 0 | 1 | 0 |
| hugin-PH right 1  | 0 | 0 | 0 | 0 |
| hugin-PH right 2  | 0 | 0 | 0 | 0 |
| hugin-PH left 1   | 0 | 0 | 0 | 0 |
| hugin-PH left 2   | 0 | 0 | 0 | 0 |

25.

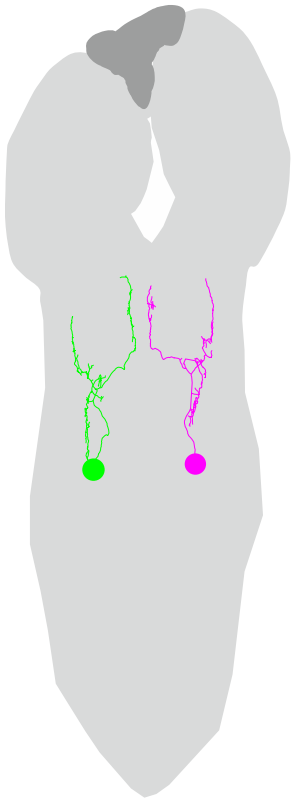

#6796532  
#2619764

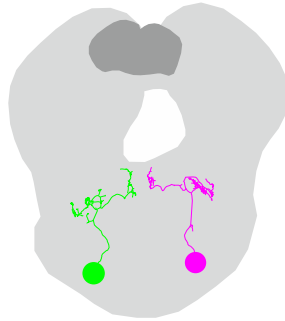

synapses to

synapses from

|                   |   |   |   |   |
|-------------------|---|---|---|---|
| hugin-PC right 1  | 0 | 0 | 0 | 0 |
| hugin-PC right 2  | 0 | 0 | 0 | 0 |
| hugin-PC right 3  | 0 | 0 | 0 | 0 |
| hugin-PC right 4  | 0 | 0 | 0 | 0 |
| hugin-PC left 1   | 0 | 0 | 0 | 0 |
| hugin-PC left 2   | 0 | 0 | 0 | 0 |
| hugin-PC left 3   | 0 | 0 | 0 | 0 |
| hugin-PC left 4   | 0 | 0 | 0 | 0 |
| hugin-RG right 1  | 0 | 0 | 0 | 0 |
| hugin-RG right 2  | 0 | 0 | 0 | 0 |
| hugin-RG left 1   | 0 | 0 | 0 | 0 |
| hugin-RG left 2   | 0 | 0 | 0 | 0 |
| hugin-VNC right 1 | 0 | 0 | 5 | 0 |
| hugin-VNC right 2 | 0 | 0 | 4 | 0 |
| hugin-VNC left 1  | 0 | 0 | 0 | 1 |
| hugin-VNC left 2  | 0 | 0 | 0 | 3 |
| hugin-PH right 1  | 0 | 0 | 0 | 0 |
| hugin-PH right 2  | 0 | 0 | 0 | 0 |
| hugin-PH left 1   | 0 | 0 | 0 | 0 |
| hugin-PH left 2   | 0 | 0 | 0 | 0 |

26.

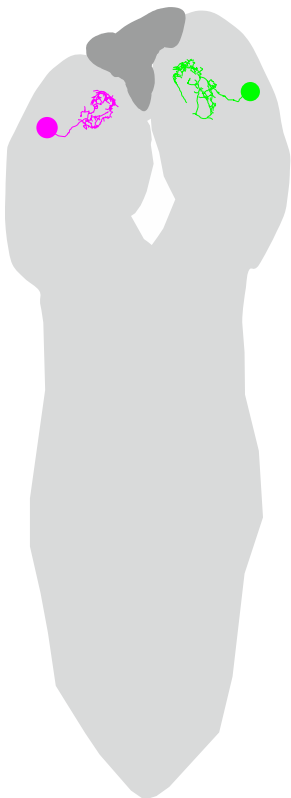

#3158085  
#2597151

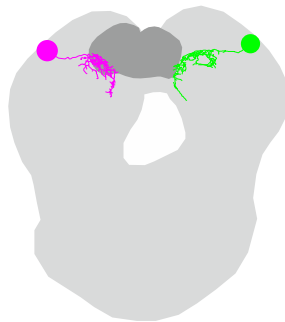

synapses to

synapses from

|                   |   |   |   |   |
|-------------------|---|---|---|---|
| hugin-PC right 1  | 5 | 0 | 1 | 0 |
| hugin-PC right 2  | 2 | 0 | 0 | 0 |
| hugin-PC right 3  | 2 | 0 | 0 | 0 |
| hugin-PC right 4  | 1 | 0 | 1 | 0 |
| hugin-PC left 1   | 0 | 9 | 0 | 0 |
| hugin-PC left 2   | 0 | 7 | 0 | 3 |
| hugin-PC left 3   | 0 | 3 | 0 | 0 |
| hugin-PC left 4   | 0 | 5 | 0 | 0 |
| hugin-RG right 1  | 0 | 0 | 0 | 0 |
| hugin-RG right 2  | 0 | 0 | 0 | 0 |
| hugin-RG left 1   | 0 | 0 | 0 | 0 |
| hugin-RG left 2   | 0 | 0 | 0 | 0 |
| hugin-VNC right 1 | 0 | 0 | 0 | 0 |
| hugin-VNC right 2 | 0 | 0 | 0 | 0 |
| hugin-VNC left 1  | 0 | 0 | 0 | 0 |
| hugin-VNC left 2  | 0 | 0 | 0 | 0 |
| hugin-PH right 1  | 0 | 0 | 0 | 0 |
| hugin-PH right 2  | 0 | 0 | 0 | 0 |
| hugin-PH left 1   | 0 | 0 | 0 | 0 |
| hugin-PH left 2   | 0 | 0 | 0 | 0 |

27.

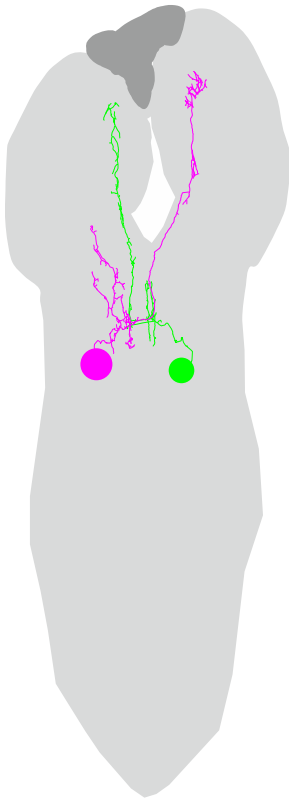

#5311299  
#5103177

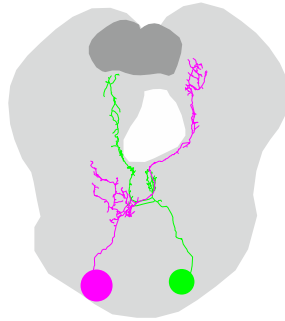

synapses to

synapses from

|                   |   |   |   |   |
|-------------------|---|---|---|---|
| hugin-PC right 1  | 0 | 0 | 0 | 0 |
| hugin-PC right 2  | 0 | 0 | 0 | 0 |
| hugin-PC right 3  | 0 | 0 | 0 | 0 |
| hugin-PC right 4  | 0 | 0 | 0 | 0 |
| hugin-PC left 1   | 0 | 0 | 0 | 0 |
| hugin-PC left 2   | 0 | 0 | 0 | 0 |
| hugin-PC left 3   | 0 | 0 | 0 | 0 |
| hugin-PC left 4   | 0 | 0 | 0 | 0 |
| hugin-RG right 1  | 0 | 0 | 0 | 0 |
| hugin-RG right 2  | 0 | 0 | 0 | 0 |
| hugin-RG left 1   | 0 | 0 | 0 | 0 |
| hugin-RG left 2   | 0 | 0 | 0 | 0 |
| hugin-VNC right 1 | 0 | 0 | 0 | 0 |
| hugin-VNC right 2 | 4 | 0 | 0 | 0 |
| hugin-VNC left 1  | 4 | 0 | 0 | 0 |
| hugin-VNC left 2  | 0 | 0 | 0 | 0 |
| hugin-PH right 1  | 0 | 0 | 0 | 0 |
| hugin-PH right 2  | 0 | 0 | 0 | 0 |
| hugin-PH left 1   | 0 | 0 | 0 | 0 |
| hugin-PH left 2   | 0 | 0 | 0 | 0 |

28.

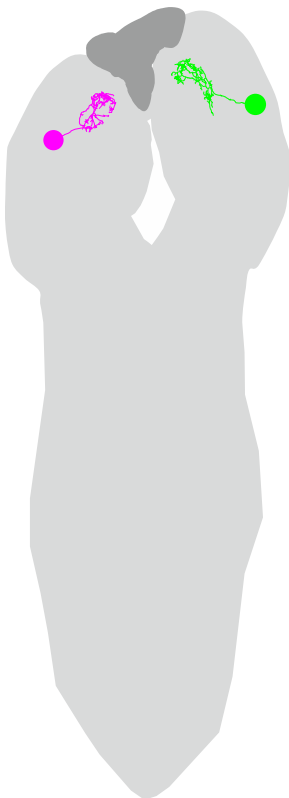

#3276003  
#7557604

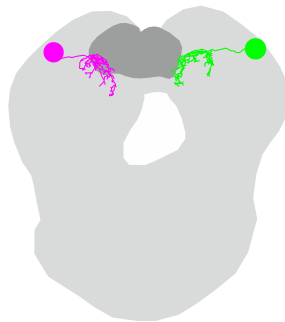

synapses to

synapses from

|                   |   |   |   |   |
|-------------------|---|---|---|---|
| hugin-PC right 1  | 4 | 0 | 2 | 0 |
| hugin-PC right 2  | 3 | 0 | 0 | 0 |
| hugin-PC right 3  | 3 | 0 | 0 | 0 |
| hugin-PC right 4  | 5 | 0 | 0 | 0 |
| hugin-PC left 1   | 0 | 4 | 0 | 0 |
| hugin-PC left 2   | 0 | 1 | 0 | 0 |
| hugin-PC left 3   | 0 | 1 | 0 | 0 |
| hugin-PC left 4   | 0 | 6 | 0 | 0 |
| hugin-RG right 1  | 0 | 0 | 0 | 0 |
| hugin-RG right 2  | 0 | 0 | 0 | 0 |
| hugin-RG left 1   | 0 | 0 | 0 | 0 |
| hugin-RG left 2   | 0 | 0 | 0 | 0 |
| hugin-VNC right 1 | 0 | 0 | 0 | 0 |
| hugin-VNC right 2 | 0 | 0 | 0 | 0 |
| hugin-VNC left 1  | 0 | 0 | 0 | 0 |
| hugin-VNC left 2  | 0 | 0 | 0 | 0 |
| hugin-PH right 1  | 0 | 0 | 0 | 0 |
| hugin-PH right 2  | 0 | 0 | 0 | 0 |
| hugin-PH left 1   | 0 | 0 | 0 | 0 |
| hugin-PH left 2   | 0 | 0 | 0 | 0 |

29.

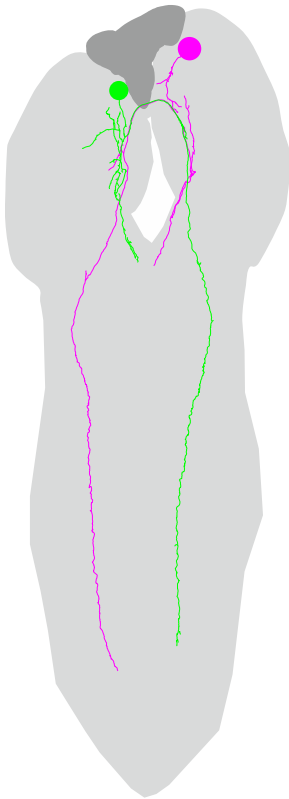

#10716080  
#3598000

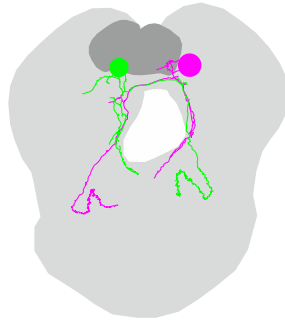

synapses to

synapses from

|                   |   |   |   |   |
|-------------------|---|---|---|---|
| hugin-PC right 1  | 0 | 0 | 0 | 0 |
| hugin-PC right 2  | 0 | 0 | 0 | 0 |
| hugin-PC right 3  | 0 | 0 | 0 | 0 |
| hugin-PC right 4  | 0 | 0 | 0 | 0 |
| hugin-PC left 1   | 0 | 0 | 0 | 0 |
| hugin-PC left 2   | 0 | 0 | 0 | 0 |
| hugin-PC left 3   | 0 | 0 | 0 | 0 |
| hugin-PC left 4   | 0 | 0 | 0 | 0 |
| hugin-RG right 1  | 0 | 0 | 0 | 0 |
| hugin-RG right 2  | 0 | 0 | 0 | 0 |
| hugin-RG left 1   | 0 | 0 | 0 | 0 |
| hugin-RG left 2   | 0 | 0 | 0 | 0 |
| hugin-VNC right 1 | 0 | 4 | 0 | 0 |
| hugin-VNC right 2 | 0 | 5 | 0 | 0 |
| hugin-VNC left 1  | 5 | 0 | 0 | 0 |
| hugin-VNC left 2  | 3 | 0 | 0 | 0 |
| hugin-PH right 1  | 0 | 0 | 0 | 0 |
| hugin-PH right 2  | 0 | 0 | 0 | 0 |
| hugin-PH left 1   | 0 | 0 | 0 | 0 |
| hugin-PH left 2   | 0 | 0 | 0 | 0 |

30.

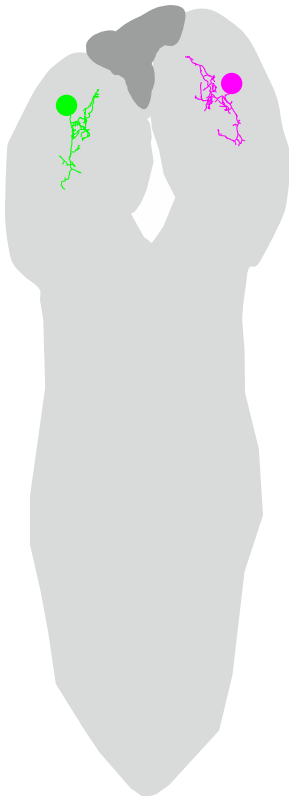

#17641913  
#13429045

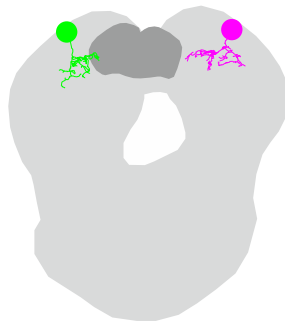

synapses to

synapses from

|                   |   |   |   |   |
|-------------------|---|---|---|---|
| hugin-PC right 1  | 0 | 1 | 0 | 0 |
| hugin-PC right 2  | 0 | 2 | 0 | 0 |
| hugin-PC right 3  | 0 | 0 | 0 | 0 |
| hugin-PC right 4  | 0 | 1 | 0 | 2 |
| hugin-PC left 1   | 2 | 0 | 1 | 0 |
| hugin-PC left 2   | 4 | 0 | 2 | 0 |
| hugin-PC left 3   | 0 | 0 | 0 | 0 |
| hugin-PC left 4   | 3 | 0 | 4 | 0 |
| hugin-RG right 1  | 0 | 0 | 0 | 0 |
| hugin-RG right 2  | 0 | 0 | 0 | 0 |
| hugin-RG left 1   | 0 | 0 | 0 | 0 |
| hugin-RG left 2   | 0 | 0 | 0 | 0 |
| hugin-VNC right 1 | 0 | 0 | 0 | 0 |
| hugin-VNC right 2 | 0 | 0 | 0 | 0 |
| hugin-VNC left 1  | 0 | 0 | 0 | 0 |
| hugin-VNC left 2  | 0 | 0 | 0 | 0 |
| hugin-PH right 1  | 0 | 0 | 0 | 0 |
| hugin-PH right 2  | 0 | 0 | 0 | 0 |
| hugin-PH left 1   | 0 | 0 | 0 | 0 |
| hugin-PH left 2   | 0 | 0 | 0 | 0 |

31.

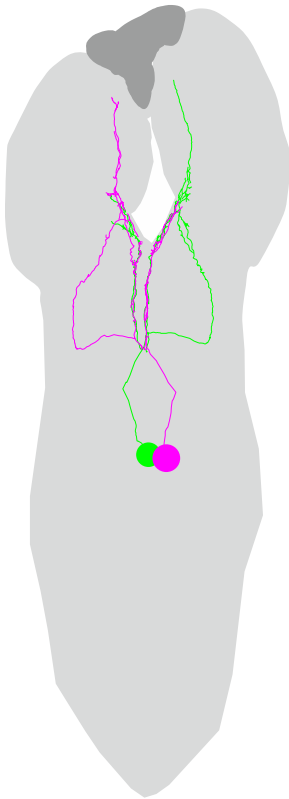

#6802553  
#5634744

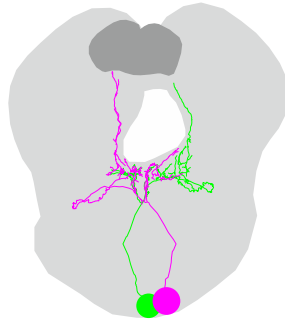

synapses to

synapses from

|                   |    |   |   |   |
|-------------------|----|---|---|---|
| hugin-PC right 1  | 10 | 0 | 2 | 0 |
| hugin-PC right 2  | 11 | 0 | 4 | 0 |
| hugin-PC right 3  | 7  | 0 | 1 | 0 |
| hugin-PC right 4  | 2  | 0 | 0 | 0 |
| hugin-PC left 1   | 0  | 6 | 1 | 2 |
| hugin-PC left 2   | 0  | 5 | 0 | 1 |
| hugin-PC left 3   | 0  | 8 | 0 | 2 |
| hugin-PC left 4   | 0  | 5 | 0 | 0 |
| hugin-RG right 1  | 0  | 0 | 0 | 0 |
| hugin-RG right 2  | 0  | 0 | 0 | 0 |
| hugin-RG left 1   | 0  | 0 | 0 | 0 |
| hugin-RG left 2   | 0  | 0 | 0 | 0 |
| hugin-VNC right 1 | 0  | 0 | 0 | 0 |
| hugin-VNC right 2 | 0  | 0 | 0 | 0 |
| hugin-VNC left 1  | 0  | 0 | 0 | 0 |
| hugin-VNC left 2  | 0  | 0 | 0 | 0 |
| hugin-PH right 1  | 0  | 0 | 0 | 0 |
| hugin-PH right 2  | 0  | 0 | 0 | 0 |
| hugin-PH left 1   | 0  | 0 | 0 | 0 |
| hugin-PH left 2   | 0  | 0 | 0 | 0 |

32.

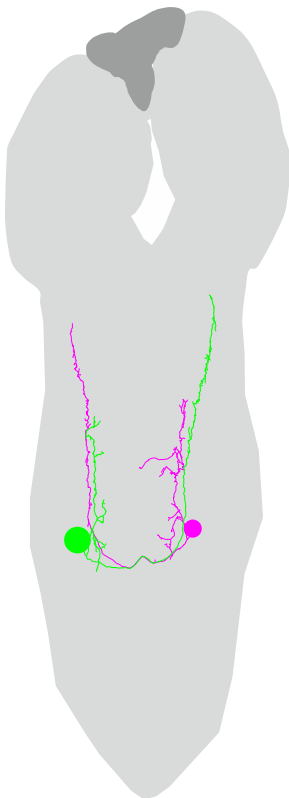

#11587441  
#5607156

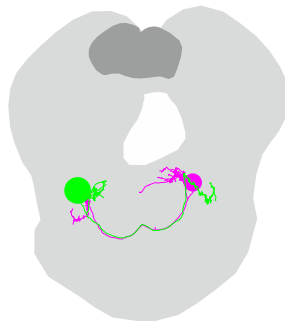

synapses to

synapses from

|                   |   |   |   |   |
|-------------------|---|---|---|---|
| hugin-PC right 1  | 0 | 0 | 0 | 0 |
| hugin-PC right 2  | 0 | 0 | 0 | 0 |
| hugin-PC right 3  | 0 | 0 | 0 | 0 |
| hugin-PC right 4  | 0 | 0 | 0 | 0 |
| hugin-PC left 1   | 0 | 0 | 0 | 0 |
| hugin-PC left 2   | 0 | 0 | 0 | 0 |
| hugin-PC left 3   | 0 | 0 | 0 | 0 |
| hugin-PC left 4   | 0 | 0 | 0 | 0 |
| hugin-RG right 1  | 0 | 0 | 0 | 0 |
| hugin-RG right 2  | 0 | 0 | 0 | 0 |
| hugin-RG left 1   | 0 | 0 | 0 | 0 |
| hugin-RG left 2   | 0 | 0 | 0 | 0 |
| hugin-VNC right 1 | 0 | 3 | 1 | 1 |
| hugin-VNC right 2 | 0 | 2 | 1 | 5 |
| hugin-VNC left 1  | 1 | 0 | 4 | 0 |
| hugin-VNC left 2  | 5 | 0 | 2 | 1 |
| hugin-PH right 1  | 0 | 0 | 0 | 0 |
| hugin-PH right 2  | 0 | 0 | 0 | 0 |
| hugin-PH left 1   | 0 | 0 | 0 | 0 |
| hugin-PH left 2   | 0 | 0 | 0 | 0 |



33.

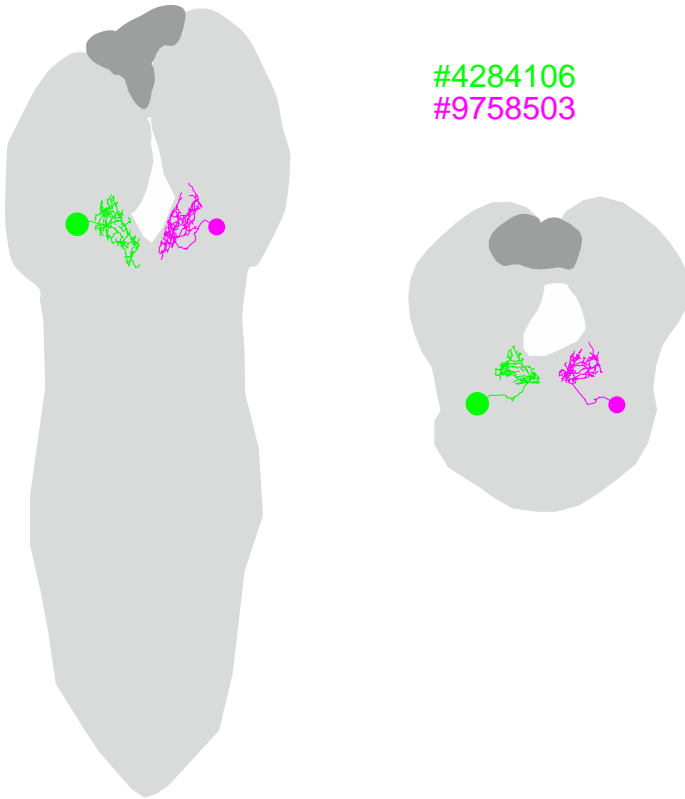

#4284106  
#9758503

synapses to

synapses from

|                   |   |   |   |   |
|-------------------|---|---|---|---|
| hugin-PC right 1  | 0 | 0 | 0 | 2 |
| hugin-PC right 2  | 0 | 0 | 0 | 0 |
| hugin-PC right 3  | 0 | 2 | 0 | 0 |
| hugin-PC right 4  | 0 | 1 | 0 | 0 |
| hugin-PC left 1   | 1 | 0 | 1 | 0 |
| hugin-PC left 2   | 0 | 0 | 3 | 0 |
| hugin-PC left 3   | 0 | 0 | 1 | 0 |
| hugin-PC left 4   | 3 | 0 | 0 | 0 |
| hugin-RG right 1  | 0 | 0 | 0 | 0 |
| hugin-RG right 2  | 0 | 0 | 0 | 0 |
| hugin-RG left 1   | 0 | 0 | 0 | 0 |
| hugin-RG left 2   | 0 | 0 | 0 | 0 |
| hugin-VNC right 1 | 0 | 0 | 0 | 0 |
| hugin-VNC right 2 | 0 | 0 | 0 | 0 |
| hugin-VNC left 1  | 0 | 0 | 0 | 0 |
| hugin-VNC left 2  | 0 | 0 | 0 | 0 |
| hugin-PH right 1  | 0 | 0 | 0 | 0 |
| hugin-PH right 2  | 0 | 0 | 0 | 0 |
| hugin-PH left 1   | 0 | 0 | 0 | 0 |
| hugin-PH left 2   | 0 | 0 | 0 | 0 |

34.

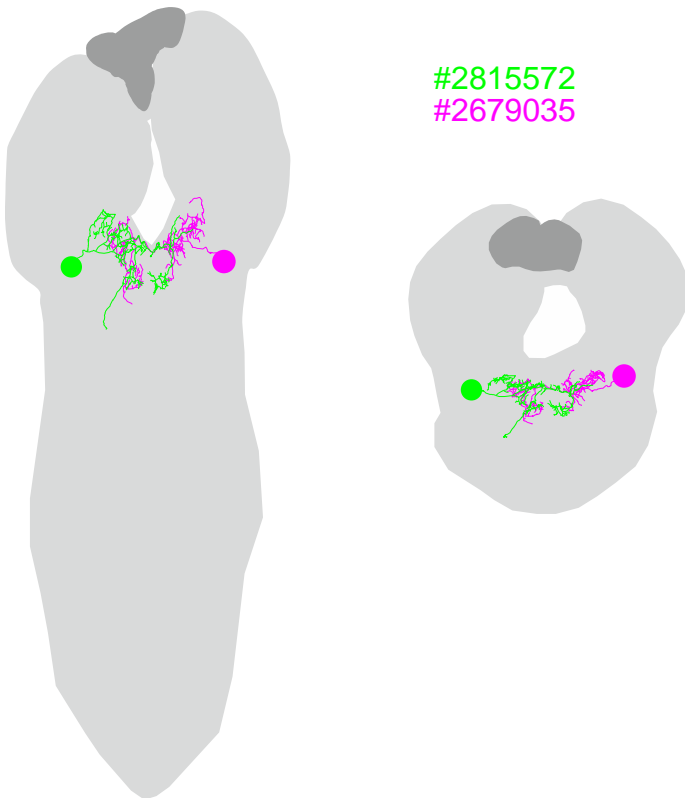

#2815572  
#2679035

synapses to

synapses from

|                   |   |   |   |   |
|-------------------|---|---|---|---|
| hugin-PC right 1  | 0 | 0 | 0 | 0 |
| hugin-PC right 2  | 0 | 0 | 0 | 0 |
| hugin-PC right 3  | 0 | 0 | 0 | 0 |
| hugin-PC right 4  | 0 | 1 | 0 | 0 |
| hugin-PC left 1   | 0 | 0 | 0 | 0 |
| hugin-PC left 2   | 0 | 0 | 0 | 0 |
| hugin-PC left 3   | 0 | 1 | 1 | 0 |
| hugin-PC left 4   | 0 | 0 | 0 | 0 |
| hugin-RG right 1  | 0 | 0 | 0 | 0 |
| hugin-RG right 2  | 0 | 0 | 0 | 0 |
| hugin-RG left 1   | 0 | 0 | 0 | 0 |
| hugin-RG left 2   | 0 | 0 | 0 | 0 |
| hugin-VNC right 1 | 0 | 0 | 0 | 0 |
| hugin-VNC right 2 | 0 | 0 | 0 | 0 |
| hugin-VNC left 1  | 0 | 0 | 0 | 0 |
| hugin-VNC left 2  | 0 | 0 | 0 | 0 |
| hugin-PH right 1  | 3 | 0 | 0 | 0 |
| hugin-PH right 2  | 2 | 0 | 0 | 0 |
| hugin-PH left 1   | 0 | 1 | 0 | 0 |
| hugin-PH left 2   | 1 | 2 | 0 | 0 |

35.

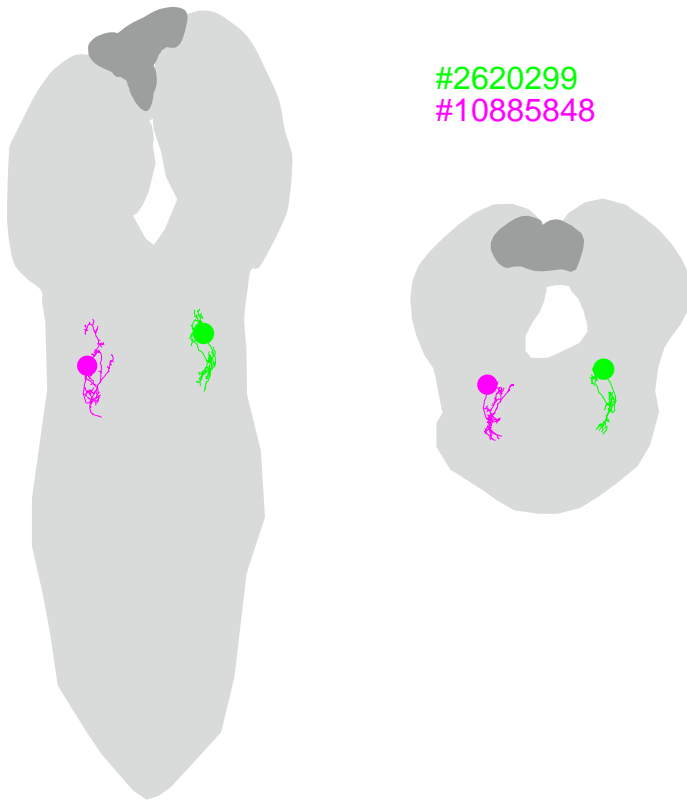

synapses to

synapses from

|                   |   |   |   |   |
|-------------------|---|---|---|---|
| hugin-PC right 1  | 0 | 0 | 0 | 0 |
| hugin-PC right 2  | 0 | 0 | 0 | 0 |
| hugin-PC right 3  | 0 | 0 | 0 | 0 |
| hugin-PC right 4  | 0 | 0 | 0 | 0 |
| hugin-PC left 1   | 0 | 0 | 0 | 0 |
| hugin-PC left 2   | 0 | 0 | 0 | 0 |
| hugin-PC left 3   | 0 | 0 | 0 | 0 |
| hugin-PC left 4   | 0 | 0 | 0 | 0 |
| hugin-RG right 1  | 0 | 0 | 0 | 0 |
| hugin-RG right 2  | 0 | 0 | 0 | 0 |
| hugin-RG left 1   | 0 | 0 | 0 | 0 |
| hugin-RG left 2   | 0 | 0 | 0 | 0 |
| hugin-VNC right 1 | 0 | 0 | 0 | 4 |
| hugin-VNC right 2 | 0 | 0 | 0 | 2 |
| hugin-VNC left 1  | 0 | 0 | 4 | 0 |
| hugin-VNC left 2  | 0 | 0 | 3 | 0 |
| hugin-PH right 1  | 0 | 0 | 0 | 0 |
| hugin-PH right 2  | 0 | 0 | 0 | 0 |
| hugin-PH left 1   | 0 | 0 | 0 | 0 |
| hugin-PH left 2   | 0 | 0 | 0 | 0 |

36.

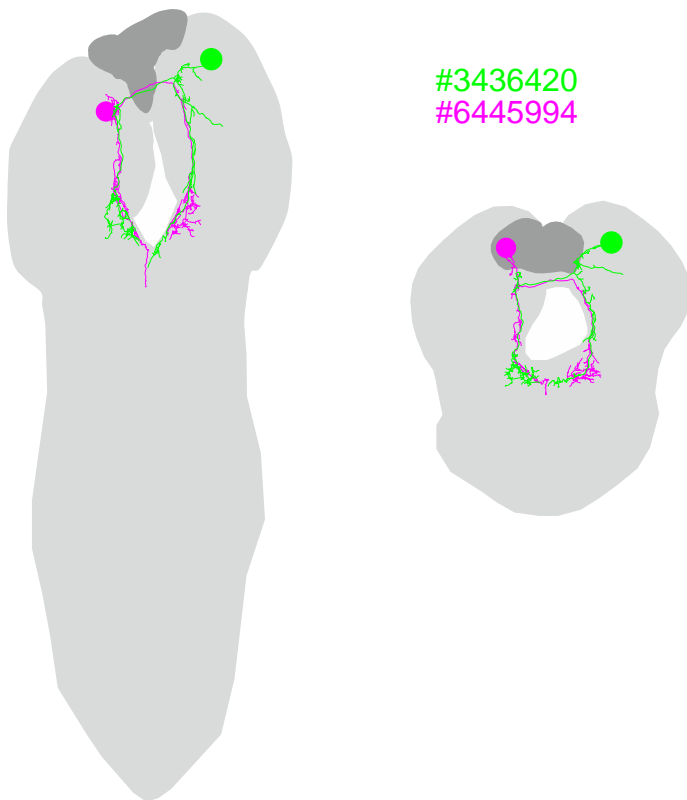

synapses to

synapses from

|                   |   |   |   |   |
|-------------------|---|---|---|---|
| hugin-PC right 1  | 0 | 0 | 0 | 2 |
| hugin-PC right 2  | 0 | 0 | 0 | 2 |
| hugin-PC right 3  | 0 | 1 | 2 | 0 |
| hugin-PC right 4  | 0 | 0 | 3 | 1 |
| hugin-PC left 1   | 0 | 0 | 0 | 2 |
| hugin-PC left 2   | 1 | 0 | 1 | 0 |
| hugin-PC left 3   | 0 | 0 | 1 | 2 |
| hugin-PC left 4   | 2 | 1 | 2 | 1 |
| hugin-RG right 1  | 0 | 0 | 0 | 0 |
| hugin-RG right 2  | 0 | 0 | 0 | 0 |
| hugin-RG left 1   | 0 | 0 | 0 | 0 |
| hugin-RG left 2   | 0 | 0 | 0 | 0 |
| hugin-VNC right 1 | 0 | 0 | 0 | 0 |
| hugin-VNC right 2 | 1 | 0 | 0 | 0 |
| hugin-VNC left 1  | 1 | 0 | 0 | 0 |
| hugin-VNC left 2  | 0 | 0 | 0 | 0 |
| hugin-PH right 1  | 0 | 0 | 0 | 0 |
| hugin-PH right 2  | 0 | 0 | 0 | 0 |
| hugin-PH left 1   | 0 | 0 | 0 | 0 |
| hugin-PH left 2   | 0 | 0 | 0 | 0 |

37.

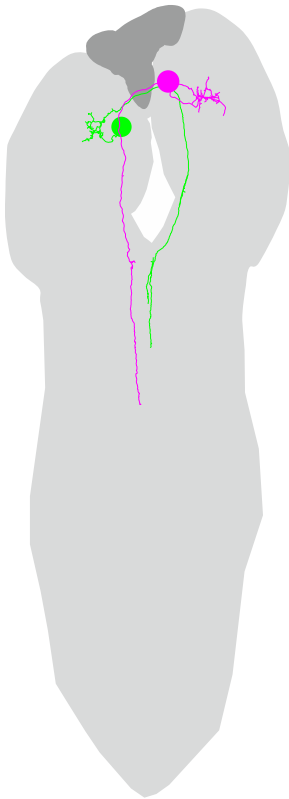

#7338309  
#5500958

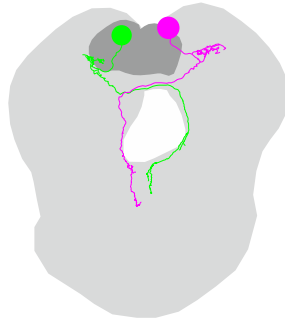

synapses to

synapses from

|                   |   |   |   |   |
|-------------------|---|---|---|---|
| hugin-PC right 1  | 0 | 0 | 0 | 0 |
| hugin-PC right 2  | 0 | 0 | 0 | 0 |
| hugin-PC right 3  | 0 | 0 | 0 | 0 |
| hugin-PC right 4  | 0 | 0 | 0 | 0 |
| hugin-PC left 1   | 0 | 0 | 0 | 0 |
| hugin-PC left 2   | 0 | 0 | 0 | 0 |
| hugin-PC left 3   | 0 | 0 | 0 | 0 |
| hugin-PC left 4   | 0 | 0 | 0 | 0 |
| hugin-RG right 1  | 0 | 0 | 0 | 0 |
| hugin-RG right 2  | 0 | 0 | 0 | 0 |
| hugin-RG left 1   | 0 | 0 | 0 | 0 |
| hugin-RG left 2   | 0 | 0 | 0 | 0 |
| hugin-VNC right 1 | 0 | 0 | 0 | 0 |
| hugin-VNC right 2 | 0 | 0 | 0 | 0 |
| hugin-VNC left 1  | 3 | 0 | 0 | 0 |
| hugin-VNC left 2  | 0 | 0 | 0 | 0 |
| hugin-PH right 1  | 0 | 0 | 0 | 0 |
| hugin-PH right 2  | 0 | 0 | 0 | 0 |
| hugin-PH left 1   | 0 | 0 | 0 | 0 |
| hugin-PH left 2   | 0 | 0 | 0 | 0 |

38.

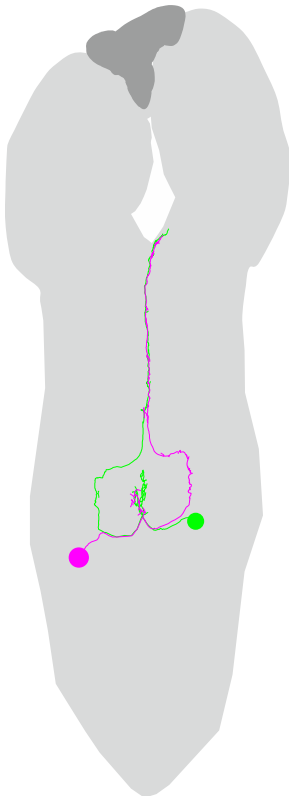

#11291634  
#7340664

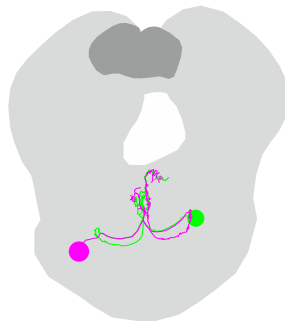

synapses to

synapses from

|                   |   |   |   |   |
|-------------------|---|---|---|---|
| hugin-PC right 1  | 0 | 0 | 0 | 0 |
| hugin-PC right 2  | 0 | 0 | 0 | 0 |
| hugin-PC right 3  | 0 | 0 | 0 | 0 |
| hugin-PC right 4  | 0 | 0 | 0 | 0 |
| hugin-PC left 1   | 0 | 0 | 0 | 0 |
| hugin-PC left 2   | 0 | 0 | 0 | 0 |
| hugin-PC left 3   | 0 | 0 | 0 | 0 |
| hugin-PC left 4   | 0 | 0 | 0 | 0 |
| hugin-RG right 1  | 0 | 1 | 0 | 0 |
| hugin-RG right 2  | 0 | 0 | 0 | 0 |
| hugin-RG left 1   | 0 | 0 | 0 | 0 |
| hugin-RG left 2   | 0 | 0 | 0 | 0 |
| hugin-VNC right 1 | 4 | 2 | 0 | 0 |
| hugin-VNC right 2 | 0 | 0 | 0 | 0 |
| hugin-VNC left 1  | 2 | 3 | 0 | 0 |
| hugin-VNC left 2  | 1 | 1 | 0 | 0 |
| hugin-PH right 1  | 0 | 0 | 0 | 0 |
| hugin-PH right 2  | 0 | 0 | 0 | 0 |
| hugin-PH left 1   | 0 | 0 | 0 | 0 |
| hugin-PH left 2   | 0 | 0 | 0 | 0 |

39.

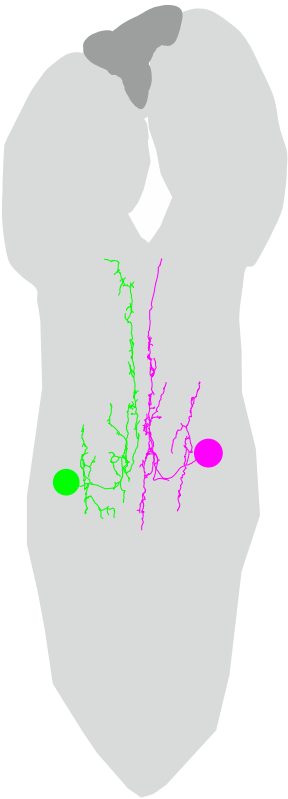

#3756408  
#2621098

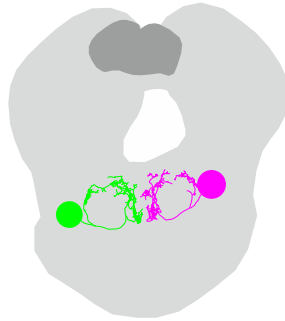

synapses to

synapses from

|                   |   |   |   |   |
|-------------------|---|---|---|---|
| hugin-PC right 1  | 0 | 0 | 0 | 0 |
| hugin-PC right 2  | 0 | 0 | 0 | 0 |
| hugin-PC right 3  | 0 | 0 | 0 | 0 |
| hugin-PC right 4  | 0 | 0 | 0 | 0 |
| hugin-PC left 1   | 0 | 0 | 0 | 0 |
| hugin-PC left 2   | 0 | 0 | 0 | 0 |
| hugin-PC left 3   | 0 | 0 | 0 | 0 |
| hugin-PC left 4   | 0 | 0 | 0 | 0 |
| hugin-RG right 1  | 0 | 0 | 0 | 0 |
| hugin-RG right 2  | 0 | 0 | 0 | 0 |
| hugin-RG left 1   | 0 | 0 | 0 | 0 |
| hugin-RG left 2   | 0 | 0 | 0 | 0 |
| hugin-VNC right 1 | 0 | 0 | 5 | 0 |
| hugin-VNC right 2 | 0 | 0 | 3 | 0 |
| hugin-VNC left 1  | 0 | 0 | 0 | 5 |
| hugin-VNC left 2  | 0 | 0 | 0 | 2 |
| hugin-PH right 1  | 0 | 0 | 0 | 0 |
| hugin-PH right 2  | 0 | 0 | 0 | 0 |
| hugin-PH left 1   | 0 | 0 | 0 | 0 |
| hugin-PH left 2   | 0 | 0 | 0 | 0 |

40.

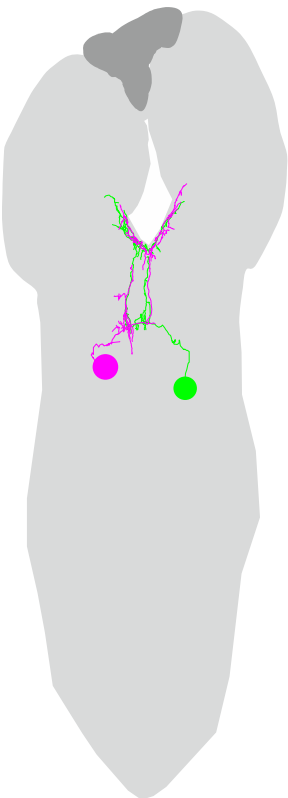

#5349961  
#5404887

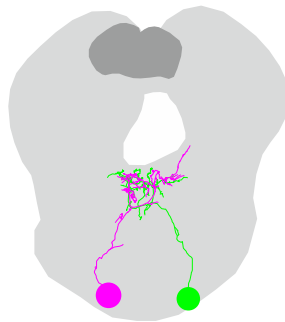

synapses to

synapses from

|                   |   |   |   |   |
|-------------------|---|---|---|---|
| hugin-PC right 1  | 0 | 0 | 0 | 0 |
| hugin-PC right 2  | 0 | 0 | 0 | 0 |
| hugin-PC right 3  | 0 | 0 | 0 | 0 |
| hugin-PC right 4  | 0 | 1 | 0 | 0 |
| hugin-PC left 1   | 0 | 0 | 1 | 0 |
| hugin-PC left 2   | 0 | 1 | 0 | 1 |
| hugin-PC left 3   | 0 | 0 | 0 | 0 |
| hugin-PC left 4   | 0 | 0 | 0 | 0 |
| hugin-RG right 1  | 0 | 0 | 0 | 0 |
| hugin-RG right 2  | 0 | 0 | 0 | 0 |
| hugin-RG left 1   | 0 | 0 | 0 | 0 |
| hugin-RG left 2   | 0 | 0 | 0 | 0 |
| hugin-VNC right 1 | 1 | 5 | 0 | 0 |
| hugin-VNC right 2 | 3 | 2 | 0 | 0 |
| hugin-VNC left 1  | 3 | 4 | 0 | 0 |
| hugin-VNC left 2  | 1 | 0 | 0 | 0 |
| hugin-PH right 1  | 0 | 0 | 0 | 0 |
| hugin-PH right 2  | 0 | 0 | 0 | 0 |
| hugin-PH left 1   | 0 | 0 | 0 | 0 |
| hugin-PH left 2   | 0 | 0 | 0 | 0 |

41.

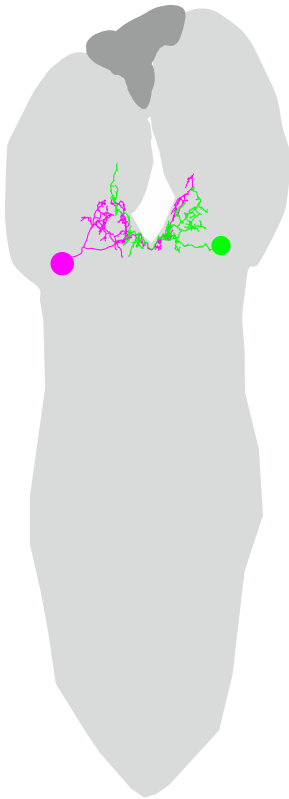

#9455820  
#9903957

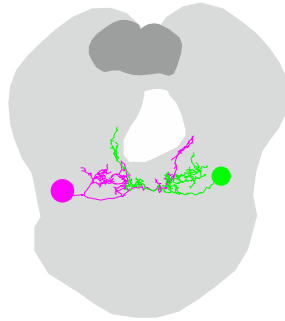

synapses to

synapses from

|                   |   |   |   |   |
|-------------------|---|---|---|---|
| hugin-PC right 1  | 0 | 2 | 2 | 0 |
| hugin-PC right 2  | 0 | 1 | 0 | 0 |
| hugin-PC right 3  | 0 | 2 | 2 | 0 |
| hugin-PC right 4  | 0 | 1 | 2 | 0 |
| hugin-PC left 1   | 4 | 0 | 1 | 0 |
| hugin-PC left 2   | 2 | 0 | 1 | 1 |
| hugin-PC left 3   | 5 | 0 | 2 | 1 |
| hugin-PC left 4   | 5 | 1 | 0 | 1 |
| hugin-RG right 1  | 0 | 0 | 0 | 0 |
| hugin-RG right 2  | 0 | 0 | 0 | 0 |
| hugin-RG left 1   | 0 | 0 | 0 | 0 |
| hugin-RG left 2   | 0 | 0 | 0 | 0 |
| hugin-VNC right 1 | 0 | 0 | 0 | 0 |
| hugin-VNC right 2 | 0 | 0 | 0 | 0 |
| hugin-VNC left 1  | 0 | 0 | 0 | 0 |
| hugin-VNC left 2  | 0 | 0 | 0 | 0 |
| hugin-PH right 1  | 0 | 0 | 0 | 0 |
| hugin-PH right 2  | 0 | 0 | 0 | 0 |
| hugin-PH left 1   | 0 | 0 | 0 | 0 |
| hugin-PH left 2   | 0 | 0 | 0 | 0 |

42.

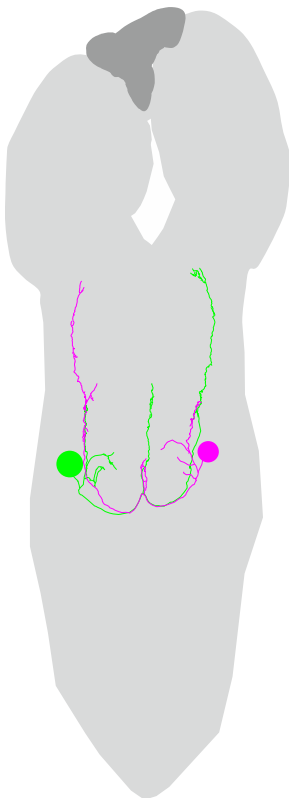

#4179669  
#2632168

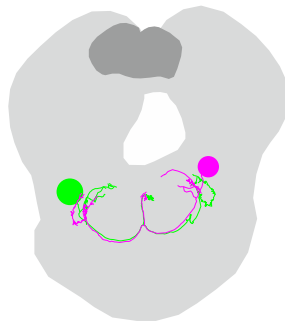

synapses to

synapses from

|                   |   |   |   |   |
|-------------------|---|---|---|---|
| hugin-PC right 1  | 0 | 0 | 0 | 0 |
| hugin-PC right 2  | 0 | 0 | 0 | 0 |
| hugin-PC right 3  | 0 | 0 | 0 | 0 |
| hugin-PC right 4  | 0 | 0 | 0 | 0 |
| hugin-PC left 1   | 0 | 0 | 0 | 0 |
| hugin-PC left 2   | 0 | 0 | 0 | 0 |
| hugin-PC left 3   | 0 | 0 | 0 | 0 |
| hugin-PC left 4   | 0 | 0 | 0 | 0 |
| hugin-RG right 1  | 0 | 0 | 0 | 0 |
| hugin-RG right 2  | 0 | 0 | 0 | 0 |
| hugin-RG left 1   | 0 | 0 | 0 | 0 |
| hugin-RG left 2   | 0 | 0 | 0 | 0 |
| hugin-VNC right 1 | 0 | 1 | 1 | 1 |
| hugin-VNC right 2 | 0 | 1 | 1 | 0 |
| hugin-VNC left 1  | 0 | 0 | 1 | 2 |
| hugin-VNC left 2  | 4 | 0 | 1 | 2 |
| hugin-PH right 1  | 0 | 0 | 0 | 0 |
| hugin-PH right 2  | 0 | 0 | 0 | 0 |
| hugin-PH left 1   | 0 | 0 | 0 | 0 |
| hugin-PH left 2   | 0 | 0 | 0 | 0 |

43.

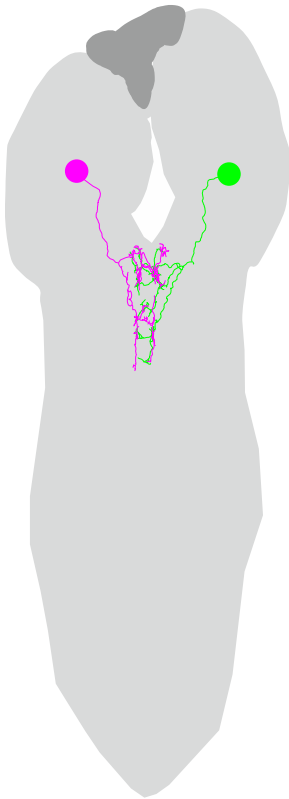

#864517  
#3266033

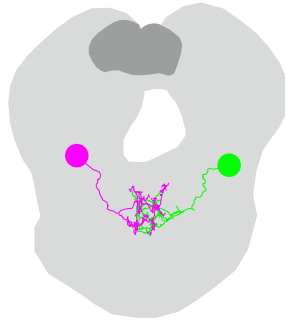

synapses to

synapses from

|                   |   |   |   |   |
|-------------------|---|---|---|---|
| hugin-PC right 1  | 0 | 0 | 0 | 0 |
| hugin-PC right 2  | 0 | 0 | 0 | 0 |
| hugin-PC right 3  | 0 | 0 | 0 | 0 |
| hugin-PC right 4  | 0 | 0 | 0 | 0 |
| hugin-PC left 1   | 0 | 0 | 0 | 0 |
| hugin-PC left 2   | 0 | 0 | 0 | 0 |
| hugin-PC left 3   | 0 | 0 | 0 | 0 |
| hugin-PC left 4   | 0 | 0 | 0 | 0 |
| hugin-RG right 1  | 0 | 0 | 0 | 0 |
| hugin-RG right 2  | 0 | 0 | 0 | 0 |
| hugin-RG left 1   | 0 | 0 | 0 | 0 |
| hugin-RG left 2   | 0 | 0 | 0 | 0 |
| hugin-VNC right 1 | 0 | 0 | 0 | 0 |
| hugin-VNC right 2 | 0 | 0 | 0 | 0 |
| hugin-VNC left 1  | 0 | 0 | 0 | 0 |
| hugin-VNC left 2  | 0 | 0 | 0 | 0 |
| hugin-PH right 1  | 0 | 2 | 0 | 0 |
| hugin-PH right 2  | 0 | 1 | 0 | 0 |
| hugin-PH left 1   | 0 | 0 | 0 | 0 |
| hugin-PH left 2   | 5 | 2 | 0 | 0 |

44.

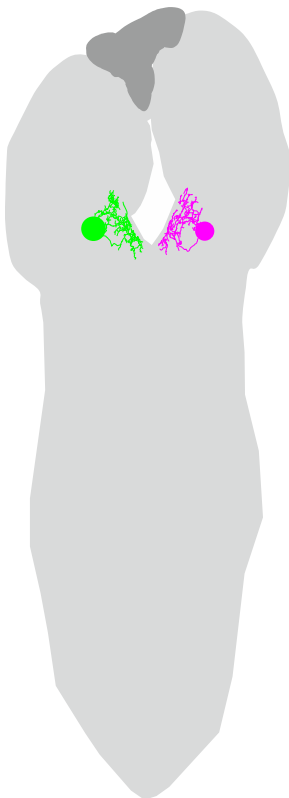

#9805588  
#11868260

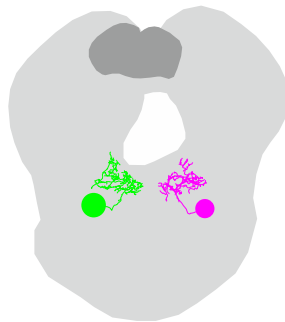

synapses to

synapses from

|                   |   |   |   |   |
|-------------------|---|---|---|---|
| hugin-PC right 1  | 0 | 0 | 0 | 0 |
| hugin-PC right 2  | 0 | 2 | 0 | 0 |
| hugin-PC right 3  | 0 | 1 | 0 | 0 |
| hugin-PC right 4  | 0 | 0 | 0 | 0 |
| hugin-PC left 1   | 5 | 0 | 2 | 0 |
| hugin-PC left 2   | 1 | 0 | 1 | 0 |
| hugin-PC left 3   | 0 | 0 | 1 | 0 |
| hugin-PC left 4   | 1 | 0 | 1 | 0 |
| hugin-RG right 1  | 0 | 0 | 0 | 0 |
| hugin-RG right 2  | 0 | 0 | 0 | 0 |
| hugin-RG left 1   | 0 | 0 | 0 | 0 |
| hugin-RG left 2   | 0 | 0 | 0 | 0 |
| hugin-VNC right 1 | 0 | 0 | 0 | 0 |
| hugin-VNC right 2 | 0 | 0 | 0 | 0 |
| hugin-VNC left 1  | 0 | 0 | 0 | 0 |
| hugin-VNC left 2  | 0 | 0 | 0 | 0 |
| hugin-PH right 1  | 0 | 0 | 0 | 0 |
| hugin-PH right 2  | 0 | 0 | 0 | 0 |
| hugin-PH left 1   | 0 | 0 | 0 | 0 |
| hugin-PH left 2   | 0 | 0 | 0 | 0 |

# K Unpaired medial interneurons

1.

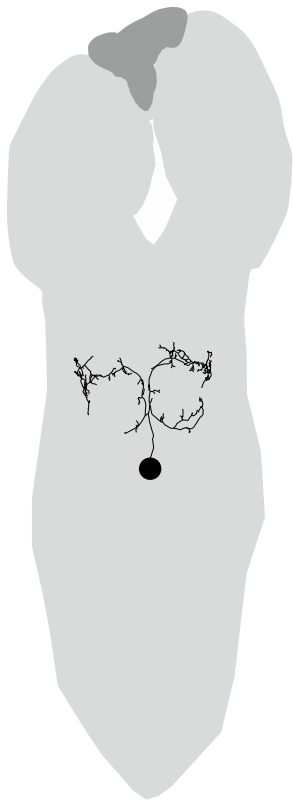

#7165165

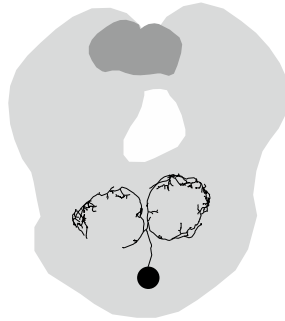

synapses to

synapses from

|                   |   |   |
|-------------------|---|---|
| hugin-PC right 1  | 0 | 0 |
| hugin-PC right 2  | 0 | 0 |
| hugin-PC right 3  | 0 | 0 |
| hugin-PC right 4  | 0 | 0 |
| hugin-PC left 1   | 0 | 0 |
| hugin-PC left 2   | 0 | 0 |
| hugin-PC left 3   | 0 | 0 |
| hugin-PC left 4   | 0 | 0 |
| hugin-RG right 1  | 0 | 0 |
| hugin-RG right 2  | 0 | 0 |
| hugin-RG left 1   | 0 | 0 |
| hugin-RG left 2   | 0 | 0 |
| hugin-VNC right 1 | 0 | 5 |
| hugin-VNC right 2 | 0 | 4 |
| hugin-VNC left 1  | 0 | 2 |
| hugin-VNC left 2  | 0 | 3 |
| hugin-PH right 1  | 0 | 0 |
| hugin-PH right 2  | 0 | 0 |
| hugin-PH left 1   | 0 | 0 |
| hugin-PH left 2   | 0 | 0 |

2.

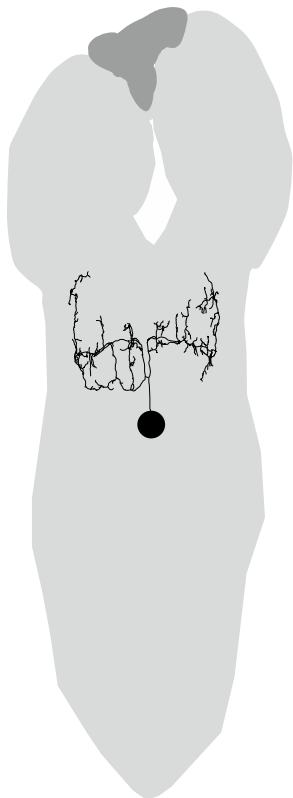

#11734960

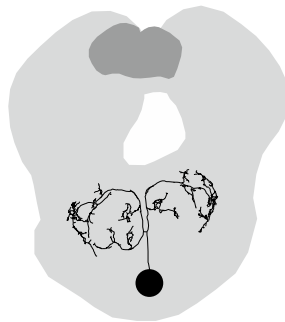

synapses to

synapses from

|                   |   |   |
|-------------------|---|---|
| hugin-PC right 1  | 0 | 0 |
| hugin-PC right 2  | 0 | 0 |
| hugin-PC right 3  | 0 | 0 |
| hugin-PC right 4  | 0 | 0 |
| hugin-PC left 1   | 0 | 0 |
| hugin-PC left 2   | 0 | 0 |
| hugin-PC left 3   | 0 | 0 |
| hugin-PC left 4   | 0 | 0 |
| hugin-RG right 1  | 0 | 0 |
| hugin-RG right 2  | 0 | 0 |
| hugin-RG left 1   | 0 | 0 |
| hugin-RG left 2   | 0 | 0 |
| hugin-VNC right 1 | 0 | 4 |
| hugin-VNC right 2 | 0 | 3 |
| hugin-VNC left 1  | 0 | 2 |
| hugin-VNC left 2  | 0 | 3 |
| hugin-PH right 1  | 0 | 0 |
| hugin-PH right 2  | 0 | 0 |
| hugin-PH left 1   | 0 | 0 |
| hugin-PH left 2   | 0 | 0 |
